# Alterations of auditory sensory gating in mice with noise-induced tinnitus treated with nicotine and cannabis extract

Barbara Ciralli<sup>1</sup>, Thawann Malfatti<sup>1,3</sup>, Thiago Z. Lima<sup>1,2</sup>, Sérgio Ruschi B. Silva<sup>1</sup>, Christopher R. Cederroth<sup>3,4</sup>, Katarina E. Leao<sup>1\*</sup>

<sup>1</sup>Brain Institute, Federal University of Rio Grande do Norte, Natal, RN, Brazil

<sup>2</sup>Department of Applied Mathematics and Statistics, Exact and Earth Sciences Center, Federal University of Rio Grande do Norte, Natal, RN, Brazil

<sup>3</sup>Experimental Audiology, Department of Physiology and Pharmacology, Karolinska Institutet, 171 77 Stockholm, Sweden

<sup>4</sup>Hearing Sciences, Division of Clinical Neuroscience, School of Medicine, University of Nottingham, NG7 2UH Nottingham, UK

\*katarina.leao@neuro.ufrn.br

Brain Institute, Federal University of Rio Grande do Norte, Av. Senador Salgado Filho, 3.000, Campus Universitário Lagoa Nova, CEP 59078-970, postal box 1524, Natal-RN, Brazil

## Abstract

**Aims/Hypothesis:** Tinnitus is a phantom sound perception affecting both auditory and limbic structures. The mechanisms of tinnitus remain unclear and it is debatable whether tinnitus alters attention to sound and the ability to inhibit repetitive sounds, a phenomenon also known as auditory gating.

**Methods:** 22 male C57BL/6J mice were used in this study. Anesthetized mice were exposed to a 9-11 kHz narrow band noise (90 dB SPL for 1 hr) and sham exposed mice were used as controls. Hearing thresholds were measured using auditory brainstem responses (ABRs) and tinnitus was assessed using Gap prepulse inhibition of acoustic startle (GPIAS). After the induction of tinnitus, mice were implanted multi-electrodes to assess auditory event-related potentials (aERPs) in the dorsal hippocampus in response to paired clicks. Alterations of aERPs under nicotine (1.0 mg/kg, intraperitoneal (i.p.) or cannabis extract (100 mg/Kg, i.p.) were evaluated (in isolation or in combination), the latter containing 47.25 mg/kg of tetrahydrocannabinol (THC); 0.43 mg/kg of cannabidiol (CBD) and 1.17 mg/kg of cannabinal (CBN), as analyzed by high-performance liquid chromatography (HPLC). Saline-treated animals were used as controls.

**Results:** Our results show that mice with behavioral evidence of tinnitus display auditory gating of repetitive click, but with larger amplitudes and longer latencies of the N40 component. In contrast, no difference was observed in the P80 amplitude and latency between groups or treatments. The combination of cannabis extract and nicotine also improved auditory gating ratio in mice with noise-induced tinnitus without permanent hearing threshold shifts by strongly increasing the first N40 click amplitude but without altering the second click response amplitude. Furthermore, the increased latency of the N40 component suggests altered temporal processing of triggered attention in mice with tinnitus due to an increased sensitivity to the exposure to cannabis extract.

**Conclusion/Interpretation:** In summary, we show that nicotine and cannabis extract alter sensory gating in mice with behavioral evidence of tinnitus and propose that the altered central plasticity in tinnitus is more sensitive to the combined actions on the cholinergic and the endocannabinoid systems. We conclude that the limbic system may play a role in the altered sensory gating responses on tinnitus since the hippocampus responses to auditory inputs are altered. These findings could enable a new understanding of which neuronal pathways could be involved in sensory gating in tinnitus.

Keywords: Tinnitus, Hippocampus, auditory event-related potentials, ABR, GPIAS, limbic

## Introduction

Subjective tinnitus is a phantom sound sensation without an external source that is related to comorbidities such as anxiety and depression (Langguth et al., 2011) and decreased quality of life (Hiller and Goebel, 2006). Tinnitus affects around 15% of the world population (Biswas et al., 2022) and so far cognitive behavioral therapy is the

only evidence-based recommended treatment (Cima et al., 2019). A relationship between tinnitus and decreased understanding of speech-in-noise has been reported (Tai and Husain, 2019) but it remains unclear whether chronic tinnitus directly interferes with speech-in-noise processing (Zeng et al., 2020), or whether this is a result of attentional problems that have been difficult to assess in tinnitus subjects (Tai and Husain, 2019). The limbic sys-

tem is implicated in the manifestation and development of chronic tinnitus (Chen et al., 2015), and PET and fMRI studies have shown greater activation of the auditory cortex, as well as non-auditory areas (frontal areas, limbic system and cerebellum) in tinnitus patients compared to controls (Lanting et al., 2009). Animal models of tinnitus point to neuronal alterations in the dorsal cochlear nucleus (Shore et al., 2016), affecting upstream auditory nuclei, with previous evidence of altered activity of the auditory cortex (Asokan et al., 2018). The auditory cortex has been shown to have significantly reduced functional connectivity with limbic structures (such as the hippocampus and amygdala) when comparing regional fMRI low-frequency activity fluctuations in a mouse model of noise-induced tinnitus (Qu et al., 2019). Still, the involvement of limbic structures in noise-induced tinnitus remains poorly investigated.

Processing of auditory input in limbic structures such as the hippocampus can be measured by event-related potential (ERP) for sensory gating, which is defined as a reduction in ERP to a repeated identical stimulus. Auditory sensory gating can be assessed with paired-click stimuli (0.5 s apart) where the auditory ERP (aERP) magnitude in response to the second click generates a smaller amplitude compared to the first. In humans, aERPs are measured using EEG, while in mice aERPs are often recorded using intra-hippocampal chronically implanted electrodes (Amann et al., 2008; Rudnick et al., 2010). An incomplete suppression of the second click represents abnormal sensory processing, and poor “gating” of paired auditory stimuli (Lijffijt et al., 2009). A decrease in sensory gating has been shown to be correlated with tinnitus severity in young adults (Campbell et al., 2018), whereas an increased latency in aERP was found in tinnitus patients (Santos Filha and Matas, 2010). Still, the neuronal correlates of aERPs are poorly understood and animal models of noise-induced tinnitus measuring auditory gating are largely lacking even though the aERP waveform of rodents, described as positive (P) or negative (N) peaks, with approximate latency in milliseconds, P20, N40 and P80 (Amann et al., 2008) or P1, N1 and P2, are analogous to the human waveforms (P50, N100 and P200).

Pharmacologically it has been shown that certain nicotinic acetylcholine receptors take part in augmenting auditory event-related potentials (Amann et al., 2008; Rudnick et al., 2010). Moreover, ERPs of subjects smoking cigarettes also containing different doses of cannabis have shown decreased ERP amplitude and to suffer acutely diminished attention and stimulus processing after smoking

cannabis (Böcker et al., 2010). On the contrary, a combined activation of the cholinergic and the endocannabinoid system has shown to improve auditory deviant detection and mismatch negativity ERPs in human subjects, but not when each drug was delivered alone (Salle et al., 2019). This indicates interactions between the two systems, however, the impact of nicotine and/or cannabis, on auditory ERPs in animal models of tinnitus, has to our knowledge not yet been studied. Here, we first hypothesized that noise-induced tinnitus interferes with auditory gating, and next that nicotine or natural extracts of cannabis could improve auditory pre-attentive processing in noise-induced tinnitus. To test this, we used a mouse model of noise-induced tinnitus without hearing impairment and measured aERPs in the dorsal hippocampus in response to paired clicks.

## Methods

### Animals

C57BL/6J mice (1 month old at the beginning of the experimental timeline) originated from an in house-breeding colony. Since female C57BL/6J mice have significantly larger aERPs than male mice (Amann et al., 2008), only males were used in order to compare results with previous literature on sensory gating (Rudnick et al., 2010). Here we used a total of 29 mice, where 7 were excluded in GPIAS initial screening due to poor GPIAS (see exclusion criteria at the GPIAS section), leading to a total of 22 mice reported in all experimental procedures. Before the beginning of experiments, the animals were randomly assigned using python scripts (see section 2.11) to the Sham (n = 11) or Noise-induced tinnitus (n = 11) group. From those, 3 animals were excluded from ERP recordings due to low signal-to-noise ratio and 2 animals died after surgery (remaining 10 Sham and 7 Noise-induced tinnitus). Animals were housed on a 12/12h day/night cycle (onset/offset at 6h/18h) at 23°C to maintain normal circadian rhythm and had free access to water and food pellets based on corn, wheat and soy (Nuvilab, Quimtia, Brazil; #100110007, Batch: 0030112110). All experiments were performed during the day cycle, ranging from 7h to 15h. Animals (2-4 per cage) were housed in IVC cages, and paper and a polypropylene tube was added as enrichment. Once implanted, animals were single-housed until the end of the experiment. Mice were tunnel handled for the experiments as it has been shown to impact stress during experimental procedures, while tail-handling was used for routine husbandry procedures. All protocols were

138 approved by and followed the guidelines of the ethical  
139 committee of the Federal University of Rio Grande do  
140 Norte, Brazil (CEUA protocol no.094.018/2018).

### 141 Auditory brainstem responses

142 The sound equipment was calibrated in a sound-shielded  
143 room with an ultrasonic microphone (4939-A-011, Brüel  
144 and Kjær) for each of the stimuli used, with background  
145 noise of  $\approx 35$  decibel sound pressure level (dBSPL). The  
146 auditory brainstem response (ABR) of mice was tested  
147 both before and after the noise exposure protocol. Mice  
148 were anesthetized with an intraperitoneal injection (10  
149  $\mu\text{l}/\text{gr}$ ) of a mixture of ketamine/xylazine (90/6 mg/kg)  
150 plus atropine (0.1 mg/kg) and placed in a stereotaxic ap-  
151 paratus on top of a thermal pad with a heater controller  
152 set to  $37^\circ\text{C}$  and ear bars holding in front of and slightly  
153 above the ears, on the temporal bone, to not block the  
154 ear canals. The head of the animal was positioned 11  
155 cm in front of a speaker (Super tweeter ST400 trio, Sele-  
156 nium Pro). To record the ABR signal, two chlorinated  
157 electrodes were used, one recording electrode and one  
158 reference (impedance 1 k $\Omega$ ) placed subdermally into small  
159 incisions in the skin covering the bregma region (reference)  
160 and lambda region (recording). Sound stimulus consisted  
161 of narrow-band gaussian white noise pulses with length  
162 of 3 ms each, presented at 10 Hz for 529 repetitions at  
163 each frequency and intensity tested. The frequency bands  
164 tested were: 8-10 kHz, 9-11 kHz, 10-12 kHz, 12-14 kHz  
165 and 14-16 kHz. Pulses were presented at 80 dB SPL in  
166 decreasing steps of 5 dB SPL to the final intensity 45 dB-  
167 SPL as previously described (Malfatti et al., 2022). The  
168 experimenter was blinded to the animal group during the  
169 ABR recordings.

### 170 Gap prepulse inhibition of acoustic startle 171 (GPIAS)

172 The Gap prepulse inhibition of acoustic startle (GPIAS)  
173 test (Turner et al., 2006), was used to infer tinnitus in  
174 noise-exposed mice. GPIAS evaluates the degree of inhi-  
175 bition of the auditory startle reflex by a short preceding  
176 silent gap embedded in a carrier background noise. Mice  
177 were initially screened 3 days before the noise exposure for  
178 their ability to detect the gap. Animals were then tested  
179 again 3 days after noise exposure or sham procedures (no  
180 noise), as previously described (Malfatti et al., 2022). In  
181 detail, animals were placed in custom-made acrylic cylin-  
182 ders perforated at regular intervals. The cylinders were  
183 placed in a sound-shielded custom-made cabinet (44 x 33  
184 x 24 cm) with low-intensity LED lights in a sound-shielded

room with  $\approx 35$  dB SPL (Z-weighted) of background noise. 185  
A single loudspeaker (Super tweeter ST400 trio, Selenium 186  
Pro, freq. response 4-18 kHz) was placed horizontally 4.5 187  
cm in front of the cylinder, and startle responses were 188  
recorded using a digital accelerometer (MMA8452Q, NXP 189  
Semiconductors, Netherlands) mounted to the base plate 190  
of the cylinder and connected to an Arduino Uno mi- 191  
crocontroller, and a data acquisition cart (Open-ephys 192  
board) analog input. Sound stimuli consisted of 60 dB SPL 193  
narrow-band filtered white noise (carrier noise); 40 ms of 194  
a silent gap (GapStartle trials); 100 ms of interstimulus 195  
interval carrier noise; and 50 ms of the same noise at 196  
105 dB SPL (startle pulse), with 0.2ms of rise and fall 197  
time. The duration of the carrier noise between each 198  
trial (inter-trial interval) was pseudo-randomized between 199  
12-22 s. Test frequencies between 8-10, 9-11, 10-12, 12-14, 200  
14-16 and 8-18 kHz were generated using a butterworth 201  
bandpass filter of 3rd order. The full session consisted of 202  
a total of 18 trials per frequency band tested (9 Startle 203  
and 9 GapStartle trials per frequency, pseudo-randomly 204  
played). It was previously shown that mice can suppress 205  
at least 30% of the startle response when the loud pulse 206  
is preceded by a silent gap in background noise (Li et al., 207  
2013), therefore we retested frequencies to which an animal 208  
did not suppress the startle by at least 30% in a 209  
second session the next day. Animals that still failed to 210  
suppress the startle following the silent gap in at least two 211  
frequencies in the initial GPIAS screening were excluded 212  
from further experiments. The experimenter was blinded 213  
to the animal group during the GPIAS recordings. 214

### Noise exposure 215

Mice were anesthetized with an intraperitoneal adminis- 216  
tration of ketamine/xylazine (90/6 mg/kg), placed inside 217  
an acrylic cylinder (4 x 8 cm) facing a speaker (4 cm 218  
distance) inside a sound-shielded cabinet (44 x 33 x 24 219  
cm) and exposed to a narrow-band white noise filtered 220  
(butterworth, -47.69dB SPL/Octave) from 9-11 kHz, at an 221  
intensity of 90 dB SPL for 1 hr, and next remained in the 222  
cylinder inside the sound shielded chamber for 2 hours, as 223  
sound-enrichment post loud noise exposure may prevent 224  
tinnitus induction (Sturm et al., 2017). Sham animals 225  
were treated equally, but without any sound stimulation. 226  
The animals were then returned to their home cages. 227

### Electrode array assembly 228

Tungsten insulated wires of 35  $\mu\text{m}$  diameter (impedance 229  
100-400 k $\Omega$ , California Wires Company) were used to man- 230  
ufacture 2 x 8 arrays of 16 tungsten wire electrodes. The 231

232 wires were assembled to a 16-channel custom made printed  
233 circuit board and fitted with an Omnetics connector (NPD-  
234 18-VV-GS). Electrode wires were spaced by 200  $\mu\text{m}$  with  
235 increasing length distributed diagonally in order to record  
236 from different hippocampal layers, such that, after im-  
237 plantation, the shortest wire were at dorsoventral (DV)  
238 depth of -1.50 mm and the longest at DV -1.96 mm. The  
239 electrodes were dipped in fluorescent dye (1,1'-dioctadecyl-  
240 3,3,3',3'-tetramethylindocarbocyanine perchlorate; DiI,  
241 Invitrogen) for 10 min (for post hoc electrode position)  
242 before implanted into the right hemisphere hippocampus.

### 243 **Electrode array implantation**

244 22 animals were used for the electrodes implantation  
245 surgery. In detail, mice were anesthetized using a mixture  
246 of ketamine/xylazine (90/6 mg/kg) and placed in a stereo-  
247 taxic frame on top of a heat pad (37°C). Dexpanthenol  
248 was applied to cover the eyes to prevent ocular dryness.  
249 When necessary, a bolus of ketamine (45 mg/kg) was  
250 applied during surgery to maintain adequate anesthesia.  
251 Iodopovidone 10% was applied on the scalp to prevent  
252 infection, and 3% lidocaine hydrochloride was injected  
253 subdermally before an incision was made. In order to  
254 expose the cranial sutures, 3% hydrogen peroxide was ap-  
255 plied over the skull. Four small craniotomies were done in  
256 a square at coordinates mediolateral (ML) 1 mm and an-  
257 teroposterior (AP) -2.4 mm; ML: 1 mm and AP: -2.6 mm;  
258 ML: 2.45 mm and AP: -2.4 mm; ML: 2.45 mm and AP:  
259 -2.6 mm, to make a cranial window were the electrodes  
260 were slowly inserted at DV coordinate of -1.9 mm (for the  
261 longest shank). Four additional holes were drilled for the  
262 placement of anchoring screws, where the screw placed  
263 over the cerebellum served as reference. The electrode im-  
264 plant was fixed to the skull with polymethyl methacrylate  
265 moldable acrylic polymer around the anchor screws. After  
266 surgery, the animals were monitored until awake and then  
267 housed individually and allowed to recover for one week  
268 before recordings. For analgesia, ibuprofen 0.04 mg/ml  
269 was administered in the water bottle 2 days before and 3  
270 days after the surgery. Subcutaneous Meloxicam 5 mg/kg  
271 was administered for 3 consecutive days after the surgery.  
272 2 animals died shortly after the surgery, remaining 10  
273 animals in the sham group and 7 in the noise-induced  
274 tinnitus group.

### 275 **Paired-click stimuli for auditory event related** 276 **potentials**

277 Mice were habituated during two days in the experimental  
278 setup and in the day of recording, anesthesia was briefly

induced with isoflurane (5% for <1 min) to gently connect  
the implanted electrode array to a head-stage (intan RHD  
2132) connected to an acquisition board (OpenEphys v2.2  
XEM6010-LX150) by a thin flexible wire. Auditory event-  
related potentials (aERPs) were recorded in freely moving  
animals placed in a low-light environment exposed to  
paired click stimulus, played by a speaker (Selenium Trio  
ST400) located 40 cm above the test area. All recordings  
were performed in standard polycarbonate cage bottom,  
which was placed inside a sound-shielded box (40 x 45 x  
40 cm). The paired clicks consisted of white noise filtered  
at 5-15 kHz presented at 85 dB SPL, 10 ms of duration,  
and 0.5 s interstimulus interval. Stimulus pairs were sepa-  
rated by 2-8 s (pseudorandomly), and a total of 50 paired  
stimuli were presented. The session duration varied from  
148 s to 442 s.

To in detail investigate auditory ERPs, average data  
from different animals, and also, compare responses from  
different experimental days and different pharmacological  
treatments, the appropriate hippocampal location for pick-  
ing up aERP was identified. As local field potentials are  
related to cell density, and thereby the resistivity of the  
tissue, it is useful to record from the hippocampus with  
its distinct layered structure that shows phase-reversals  
of local field potentials (Scheffer-Teixeira et al., 2012).  
Responses to paired clicks were recorded one week after  
surgery. The grand average of aERP (average of 50  
clicks) for each channel was plotted and the changed sig-  
nal polarity across hippocampal layers was identified, as  
the electrode array channels were distributed at different  
depths (Figure 3A-B). To facilitate comparison of aERP  
between implanted animals we selected the first channel  
above phase reversal (Figure 3B, gray dashed rectangle)  
that showed a clear negative peak followed by a positive  
peak in the deeper channel. The visualization of the  
phase reversal channel was routinely added to analysis  
as channels sometimes shifted in the same animal, likely  
due to small movements in the electrode array when con-  
necting/disconnecting mice to/from the headstage during  
different recording sessions. The experimenter was blind  
to the animal group during the ERP recordings.

### *Cannabis sativa* extract production and anal- ysis

Here we used a cannabis extract instead of pure agonists,  
which is more representative of the human exposure than  
the use of pure THC or other synthetic agonists (Wilkin-  
son et al., 2003; Salle et al., 2019). THC is the main  
psychoactive compound in cannabis and it is known to

327 be partial agonist of CB1 and CB2 receptors (Sampson,  
328 2020), while CBN activates CB1 and CB2 receptors with  
329 more affinity over the latter and CBD acts as a nega-  
330 tive allosteric modulator of CB1 (Sampson, 2020). The  
331 Cannabis sativa extract was produced from an ethanolic  
332 extraction with the flowers previously dried and crushed.  
333 After leaving them in contact with the solvent for 5 min  
334 in an ultrasonic bath, filtration was performed and the  
335 process was repeated twice. Additionally, the solvent  
336 was evaporated and recovered, leaving only the cannabis  
337 extract in resin form. Decarboxylation of the acidic com-  
338 ponents, mainly tetrahydrocannabinolic acid (THCA) into  
339 delta-9-tetrahydrocannabinol (THC), was carried out by  
340 heating the material at 90°C until the conversion to the  
341 neutral forms had been completed. The cannabis extract  
342 was analyzed by high-performance liquid chromatogra-  
343 phy (HPLC). Analytical standards of THC (Cerilliant  
344 T-005), cannabiniol (CBN, Cerilliant C-046) and cannabi-  
345 diol (CBD, Cerilliant C-045) were used in the calibration  
346 curve dilutions. An Agilent 1260 LC system (Agilent  
347 Technologies, Mississauga, ON, Canada) was used for the  
348 chromatographic analysis. A Poroshell 120 EC-C18 col-  
349 umn (50 mm × 3.0 mm, 2.7 μm, Agilent Technologies)  
350 was employed, with a mobile phase at a flow rate of 0.5  
351 mL/min and temperature at 50°C (separation and detec-  
352 tion). The compositions were (A) water and (B) methanol.  
353 0.1% formic acid was added to both water and methanol.  
354 The total analysis time was 18 min with the following  
355 gradient: 0–10 min, 60–85%B; 10–11 min, 85–100%B;  
356 11–12 min, 100%; 12–17 min, 100–60%; 17–18 min, 60%  
357 the temperature was maintained at 50°C (separation and  
358 detection). The injection volume was 5 μL and the com-  
359 ponents were quantified based on peak areas at 230 nm.  
360 During the experiments we used a single dose of cannabis  
361 extract for each animal (100 mg/Kg), containing 47.25  
362 mg/kg of tetrahydrocannabinol (THC); 0.43 mg/kg of  
363 cannabidiol (CBD) and 1.17 mg/kg of cannabiniol (CBN)  
364 as analyzed by high-performance liquid chromatography  
365 (HPLC), and kindly donated by the Queiroz lab, Brain  
366 Institute, Federal University of Rio Grande do Norte,  
367 Brazil.

## 368 Pharmacology

369 To activate the cholinergic system, and specifically brain  
370 nicotinic acetylcholine receptors, animals received a single  
371 intraperitoneal injection of nicotine (Sigma N3876) at 1.0  
372 mg/kg (Metzger et al., 2007) or saline (randomized or-  
373 der, 2 days in between session 1 and 2) 5 minutes before  
374 aERP recordings. Since THC, CBD and CBN have a

longer half-life, approximately 110 min in mouse plasma  
(Torrens et al., 2020), 3.9h in mouse plasma (Xu et al.,  
2019) and 32h in human plasma (Johansson et al., 1987)  
respectively, when compared to nicotine (approximately  
6-7 min (Petersen et al., 1984)), we treated with cannabis  
last (3rd session) at a single dose of cannabis extract (100  
mg/Kg). On the experimental day, the cannabis extract  
resin was diluted in corn oil to 10 mg/ml solution by mix-  
ing the extract and the oil and then sonicating for 5 min  
before injected intraperitoneally (at volume of 10 μl/gr  
body weight) 30 min prior to aERP recording sessions to  
reach max plasma concentration of THC (Torrens et al.,  
2020). After the third recording session, an additional  
dose of nicotine (1 mg/Kg) was injected (to study poten-  
tially synergistic effects of cannabis extract + nicotine)  
and the animals were recorded 5 min later to observe how  
the interaction of the cholinergic and endocannabinoid  
system affects aERPs. After each aERP recording session,  
mice were unconnected from the headstage and returned  
to their home cage.

## Histology

To verify expected electrode positioning, animals were  
deeply anesthetized at the end of the experimental timeline  
with a mixture of ketamine/xylazine (180/12 mg/kg) and  
transcardiac perfused with cold phosphate buffered saline  
(PBS) followed by 4% paraformaldehyde (PFA). Brains  
were dissected and placed in 4% PFA for 48 hrs. Next,  
brains were sliced using a free-floating vibratome (Leica  
VT1000S) at 75 μm thickness, and cell nuclei were stained  
with 4',6-diamidino-2-Phenylindole (DAPI, Sigma) to  
visualize cell layers and borders of the hippocampus. In  
addition to DiI-staining the electrodes, a current pulse of  
500 μA was routinely passed through the deepest electrode  
for 5 s at the end the last aERP recordings to cause a  
small lesion around the electrode tip to confirm electrode  
depth. Images were visualized using a Zeiss imager A2  
fluorescence microscope with a N-Achroplan 5x objective.

## Data Analysis

Analysis of auditory brainstem responses was done as pre-  
viously described (Malfatti et al., 2022) and consisted of  
averaging the 529 trials, filter the signal using a 3rd order  
butterworth bandpass filter from 600-1500 Hz, and slice  
the data 12 ms after the sound pulse onset. Thresholds  
were defined by automatically detecting the lowest inten-  
sity that can elicit a wave peak one standard deviation  
above the mean, and preceded by a peak in the previous  
intensity (Malfatti et al., 2022). Effect of noise exposure

422 on ABR thresholds was evaluated using the Friedman  
423 Test, and pairwise comparisons were performed using the  
424 Wilcoxon test. Effect of noise exposure on ABR thresh-  
425 old differences before and after exposure was evaluated  
426 using two-way ANOVA (Group x Frequency of stimu-  
427 lus as factors). When multiple comparisons within the  
428 same dataset were performed, p values were Bonferroni-  
429 corrected accordingly.

430 For each frequency tested in GPIAS, Startle and Gap-  
431 Starle trials responses were separated and the signal was  
432 filtered with a Butterworth lowpass filter at 100 Hz. The  
433 absolute values of the accelerometer axes, from the ac-  
434 celerometer fitted below the cylinders enclosing the mice  
435 during the modified acoustic startle test, were averaged  
436 and sliced 400 ms around the startle pulse (200 ms before  
437 and 200 ms after). The root-mean-square (RMS) of the  
438 sliced signal before the Startle (baseline) was subtracted  
439 from the RMS after the startle response (for both Startle  
440 only and GapStartle sessions). The GPIAS index for each  
441 frequency was then calculated as

$$\left(1 - \left(\frac{GapStartleRMS}{StartleRMS}\right)\right) * 100$$

442 generating percentage of suppression of startle. For each  
443 animal, the most affected frequency was determined as  
444 the frequency with the greatest difference in GPIAS index  
445 before and after noise exposure. This was done as mice  
446 did not show decreased GPIAS at the same narrow-band  
447 frequency despite being subjected to the same noise expo-  
448 sure, indicating individual differences in possible tinnitus  
449 perception (Longenecker and Galazyuk, 2016). The defi-  
450 nition of the most affected frequency followed the same  
451 procedure for both sham and noise-induced tinnitus ani-  
452 mals. The effects of group (sham or noise-exposed), epoch  
453 (before or after exposure) and frequency of stimulus were  
454 tested using 3-way mixed models ANOVA. The effect of  
455 the noise exposure on the GPIAS index of the most af-  
456 fected frequency was evaluated using the Friedman test,  
457 and pairwise comparisons were done using the Wilcoxon  
458 test.

459 Auditory event-related potentials in response to paired-  
460 clicks were filtered using a low pass filter at 60 Hz, sliced  
461 0.2 s before and 1 s after the first sound click onset, and  
462 all 50 trials were averaged. To compare signals between  
463 different animals (n=10 sham and n=7 noise-induced tin-  
464 nitus) and different treatments we always analyzed the  
465 channel above hippocampal phase reversal with a negative  
466 peak around 40 ms (N40) and a positive peak around 80  
467 ms latency (P80). Auditory ERP components were quan-  
468 tified by peak amplitude (baseline-to-peak) after stimulus

onset. The N40 was considered as the maximum negative 469  
deflection between 20 and 50 ms after the click stimulus, 470  
and P80 as the maximum positive deflection after the 471  
N40 peak. The baseline was determined by averaging all 472  
50 trials and then averaging the 200 ms of prestimulus 473  
activity (before the first click). The latency of a compo- 474  
nent was defined as the time of occurrence of the peak 475  
after stimulus onset. The ratio in percentage of the first 476  
and second click amplitude (the suppression of the second 477  
click, e.g. sensory filtering) was calculated as 478

$$\left(1 - \left(\frac{SecondClickAmplitude - Baseline}{FirstClickAmplitude - Baseline}\right)\right) * 100$$

479 and error bars represent standard error of the mean (s.e.m) 479  
for all figures. Nonparametric ANOVA was used to test 480  
pointwise measurement of amplitude and latency at N40 481  
and P80, whenever the response failed to comply with nor- 482  
mality, homoscedasticity and independence assumptions 483  
and parametric fitting was inadequate. Under the nonpara- 484  
metric framework, post-hoc multiple comparisons were 485  
adjusted by Bonferroni correction. Differences in ERPs 486  
N40-P80 peak width were evaluated using mixed-models 487  
ANOVA, and differences in occurrence of double-peak 488  
responses were evaluated using McNemar's test. 489

## 490 **Functional data analysis of auditory event-** 491 **related potentials**

492 Statistical analysis used for functional data analysis (Fig- 492  
ure S6) was carried out with R software and the functional 493  
data analysis package (see Data and Code Availability 494  
Statement). In brief, local field potentials (LFP) in the 495  
channel above phase reversal from sham and noise-induced 496  
tinnitus mice (n = 6 per group, data from first cohort 497  
with adequate signal-to-noise ratio) were downsampled 498  
to 600Hz with frequencies > 60 Hz filtered out. A time 499  
window of 200 ms before and 1 s after the first sound 500  
click was used for analysis. The LFP from each trial 501  
was individually fitted into a function corresponding to 502  
a linear combination of a Fourier expansion with a 121- 503  
basis function, whose coefficients were determined by least 504  
squares regression. Further smoothing was achieved as the 505  
mean function was computed from the repetitions from 506  
each animal at each experimental condition, and mean 507  
functions were used in further analysis. Next, a functional 508  
principal component analysis (FPCA) was carried out to 509  
explore the main patterns of variability in the data. The 510  
VARIMAX algorithm for rotation was used to improve 511  
interpretation of the principal components. In addition 512  
to providing visual clusterization of the data, principal 513

514 components were also used as the variables for inferential  
515 tests of the significance of the effects from experimental  
516 factors (Condition; noise-induced tinnitus and sham ani-  
517 mals and Treatment; saline, nicotine, cannabis extract  
518 and cannabis extract plus nicotine). Since the experiment  
519 was done in a two-factor design with repeated measures  
520 in only one, principal components were tested by means  
521 of (mixed) repeated measures ANOVA with Condition as  
522 between (or whole plot) factor and Treatment as within  
523 (or subplot) factor (and animals or replicates as a random  
524 factor). The validity of the test was checked by residual  
525 analysis and Tukey's procedure for multiple comparison  
526 was carried out as a post-hoc test to describe the effect of  
527 treatment, whenever it had been identified as statistically  
528 significant by ANOVA. A 95% joint confidence level was  
529 considered for multiple comparisons.

## 530 Results

531 We first aimed to reproduce a model of noise-induced  
532 tinnitus with a normal audiogram, as reported in both  
533 humans and animals (Longenecker and Galazyuk, 2016;  
534 Campbell et al., 2018; Qu et al., 2019). In order to  
535 investigate whether noise-exposure can affect auditory  
536 gating we established an experimental timeline for experi-  
537 ments evaluating auditory perception using three different  
538 tests: Auditory brainstem responses (ABRs), Gap pre-  
539 pulse inhibition of acoustic startle (GPIAS) and Auditory  
540 event-related potentials (aERPs). Hearing thresholds of  
541 mice were assessed using ABRs 2 days before (baseline)  
542 and 2 days after sham or noise exposure (Figure 1A).  
543 ABRs showed field potentials with distinct peaks indicat-  
544 ing neuronal activity at the auditory nerve, cochlear nuclei,  
545 superior olivary complex, and inferior colliculus (Henry,  
546 1979) in response to sound clicks presented at different fre-  
547 quencies (Figure 1B-C). Similar to sham, noise exposure  
548 did not cause any change in ABR hearing thresholds at all  
549 frequencies tested when compared to baseline (Friedman  
550 eff. size  $< 0.58$ ,  $p > 0.08$ ; Figure 1D). Threshold shifts  
551 confirmed that noise-exposed animals were impacted to a  
552 similar degree than sham mice ( $F(4,84) < 2.021$ ,  $p > 0.09$ ;  
553 Figure 1E). Unlike other models of tinnitus (Zhang et al.,  
554 2020), we did not detect any difference in ABR Wave 1  
555 amplitude (Kruskal-Wallis, eff. size  $< 0.012$ ,  $p > 0.14$ )  
556 or Wave 5 latency (Kruskal-Wallis, eff.size  $< 0.011$ ,  $p >$   
557  $0.073$ , Figure S1). These findings confirm that the noise  
558 exposure did not cause any detectable change in hearing  
559 thresholds.

560 Three days before and 3 days after noise exposure  
561 mice were tested for GPIAS (Figure 2A-C). No effect of

group (sham or noise-induced tinnitus), epoch (before or  
562 after noise exposure procedure) or frequency of stimu-  
563 lus was found in GPIAS when evaluating all frequencies  
564 from every animal ( $F(5,65) < 1.419$ ,  $p > 0.229$ ; Figure  
565 2D-E), possibly due to each individual mouse may expe-  
566 rience a different tinnitus pitch. We therefore evaluated  
567 the background frequency that interferes most with gap  
568 prepulse startle suppression for each individual mouse,  
569 which would correspond to the most likely tinnitus pitch  
570 of these animals (Figure 2F-G). Sham exposure had no ef-  
571 fect on GPIAS (Friedman test; eff.size = 0.075;  $p = 0.365$ ;  
572 Figure 2F, left), while in noise-induced tinnitus mice the  
573 noise exposure had a significant effect in GPIAS index  
574 (Friedman test; eff. size = 1.0;  $p = 1.8e-03$ ), showing a  
575 decrease in startle suppression when comparing before and  
576 after noise exposure (Wilcoxon test,  $p=9.8e-04$ ; Figure  
577 2F, right). GPIAS showed individual variability (Figure  
578 2G) similar to previously shown for noise-induced tinnitus  
579 in mice (Longenecker and Galazyuk, 2016) and confirms  
580 that tinnitus interferes with the ability to suppress the  
581 startle response in noise-induced tinnitus animals.  
582

583 After the ABR and GPIAS tests, electrodes were im-  
584 planted in the dorsal hippocampus for the assessment of  
585 sensory gating (Figure 3A). As expected, auditory event-  
586 related potential recordings showed that the second click  
587 consistently generated a smaller aERP (Figure 3B) and  
588 the magnitude of peaks around 40ms and 80ms were quan-  
589 tified from baseline as the N40 and P80 peak, respectively,  
590 for both the first and second click in the phase-reversal  
591 channel (see Methods, Figure 3B-C). Next, to investigate  
592 the impact of noise-induced tinnitus on auditory gating  
593 (11 days after noise-exposure), freely exploring mice were  
594 individually subjected to randomized paired-click stimuli  
595 where both sham and noise-induced tinnitus mice pre-  
596 sented characteristic aERP (Figure 3D). Two types of  
597 measurements were evaluated: the responses to sound  
598 clicks measured in the hippocampus (amplitude in  $\mu V$   
599 and latency in ms), which is a measurement of sound  
600 processing in the limbic system; and the ratio between  
601 the second and the first click responses (both amplitude  
602 and latency unitless), which measures the sensory gating.

603 As attention is modulated by the cholinergic system  
604 (Ballinger et al., 2016) and also the endocannabinoid sys-  
605 tem (Verrico et al., 2004), we tested the impact of two  
606 agonists to both systems (nicotine and cannabis extract,  
607 individually or in combination) in modulation of auditory  
608 ERPs in our model of noise-induced tinnitus (Figure 4A).  
609 The average of the N40 response in sham-exposed animals  
610 showed the second click to be consistently smaller in am-  
611 plitude compared to the first click ( $F(1,10) = 29.9$ ,  $p =$

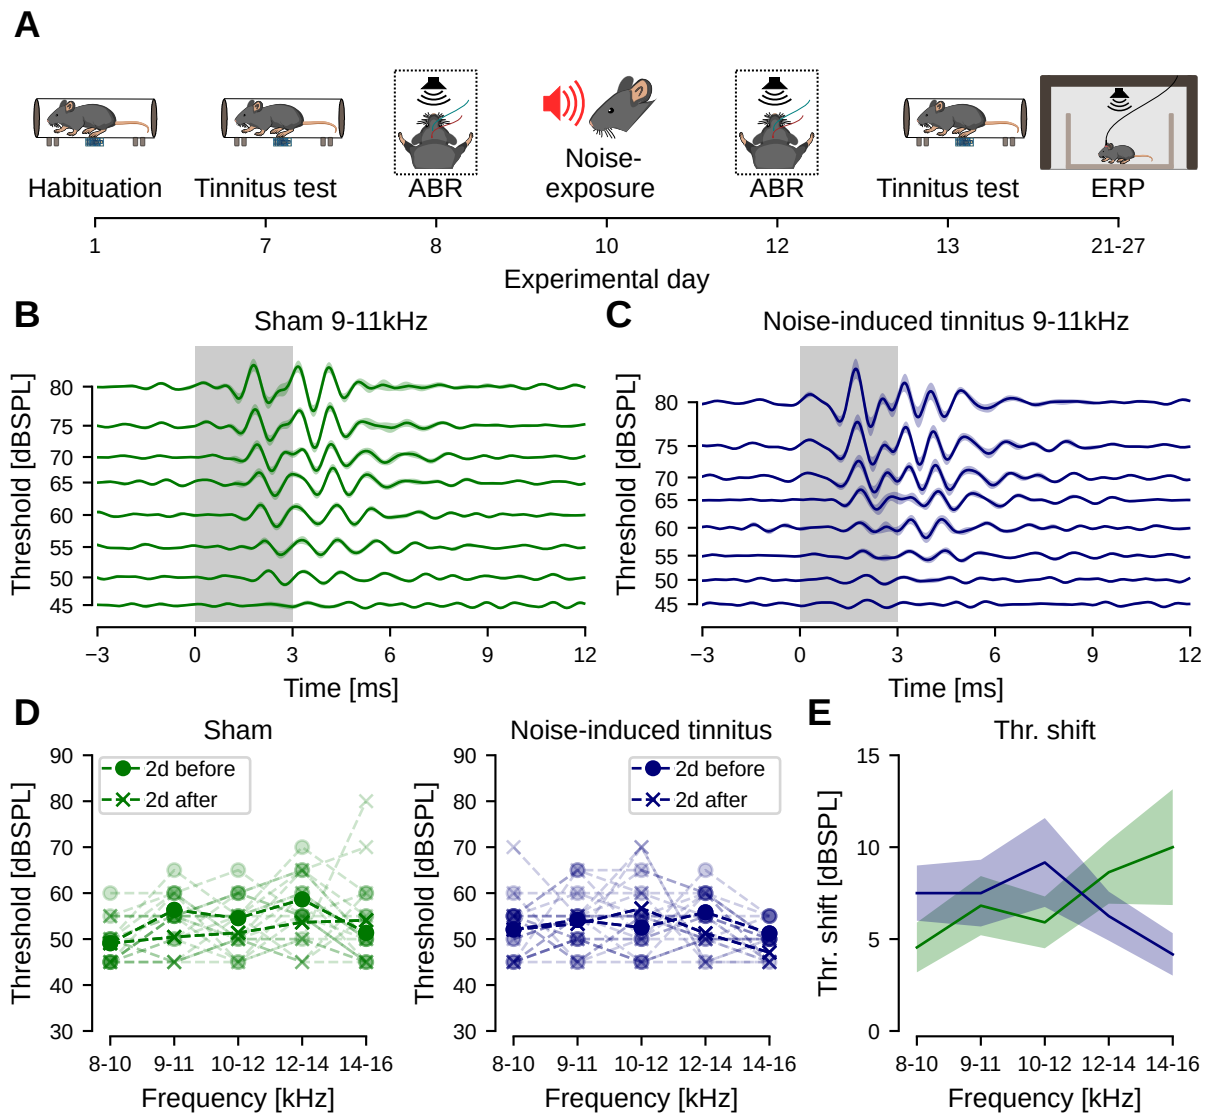

**Figure 1:** Noise exposure does not cause hearing threshold shift. A) Full experimental timeline highlighting time of ABR recordings (dotted rectangle). B-C) Mean auditory brainstem response (ABR) to 9-11kHz after noise-exposure for intensities 45-80 dBSPL for sham mice (B) and noise-induced tinnitus animals (C). Shaded traces show SEM, gray square indicates the sound pulse duration. D) Auditory thresholds quantified for sham ( $n = 11$ , left) and noise-induced tinnitus ( $n = 11$ , right) animals two days before and two days after noise exposure, showing no significant difference at any frequency tested (Wilcoxon test,  $p > 0.05$  for all frequencies in both groups). E) Threshold shift for sham and noise-induced tinnitus mice showing no significant difference between groups (Student's t-test,  $p > 0.05$  for all frequencies).

612 2.7e-04; Figure S2A, left). This significant attenuation  
 613 on the second click was also observed for noise-induced  
 614 tinnitus ( $F(1,10) = 11.2$ ,  $p = 7e-03$ ; Figure S2A, right).  
 615 The second click attenuation differed in strength depend-  
 616 ing on the pharmacological treatment between sham and  
 617 noise-induced tinnitus mice ( $F(3,60) = 3.67$ ,  $p = 1.7e-$   
 618  $02$ ; Figure S2A). For noise-induced tinnitus animals the  
 619 second click was smaller than the first in nicotine ( $p =$   
 620  $1.6e-02$ ) and cannabis extract + nicotine ( $p = 1.6e-02$ )  
 621 treatment but not in saline ( $p = 0.237$ ) or cannabis ex-  
 622 tract alone ( $p = 0.216$ ; Figure S2A, right), in contrast to  
 623 sham animals. We thereby found a significant interaction

624 between treatment and animal condition (sham or noise-  
 625 induced tinnitus) on the N40 suppression ratio ( $F(3,60) =$   
 626  $3.5$ ,  $p = 2e-02$ , Figure 4B). Looking specifically at sham  
 627 mice, no significant difference was found in the N40 aERP  
 628 ratio between treatments, while for noise-induced tinnitus  
 629 animals, pairwise comparisons showed an increased N40  
 630 amplitude ratio after administration of cannabis extract  
 631 + nicotine compared to cannabis extract alone ( $p = 1.9e-$   
 632  $02$ ), nicotine alone ( $p = 3.2e-02$ ) and NaCl treatment  
 633 ( $p = 1.9e-02$ , Figure 4B). There was also a significant  
 634 difference in N40 ratio under cannabis extract + nicotine  
 635 treatment between sham and noise-induced tinnitus mice



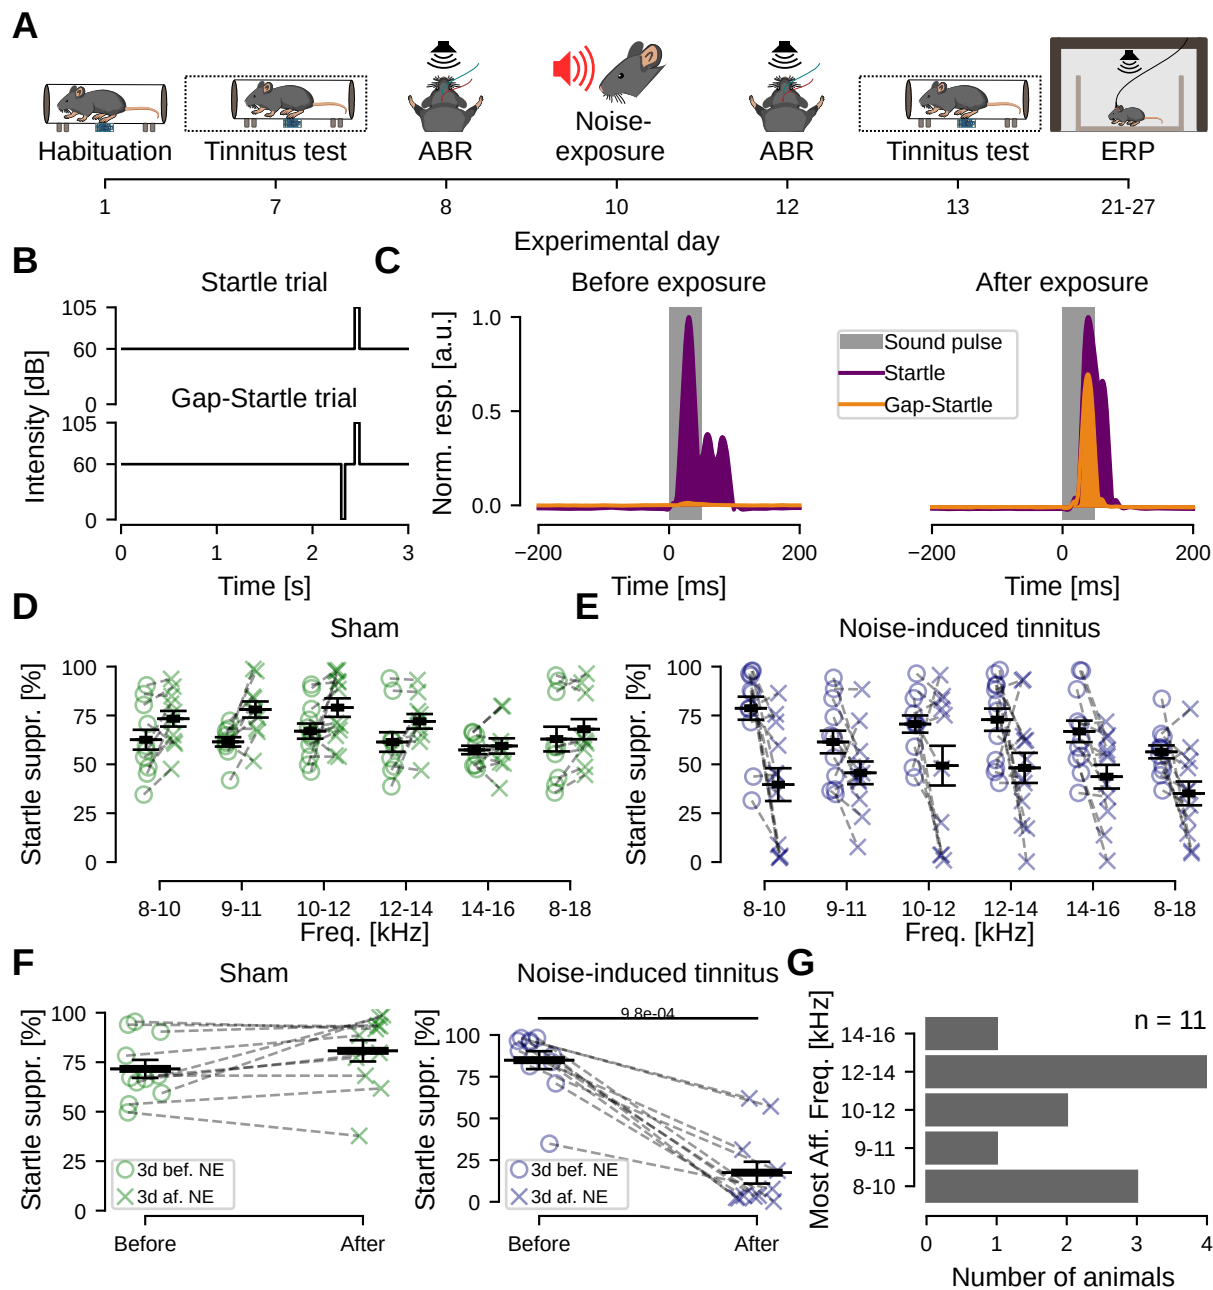

**Figure 2:** Noise-exposed animals showed decreased startle suppression. A) Timeline of experiments highlighting time point of the GPIAS tests. B) Schematic GPIAS protocol. C) Representative examples of startle suppression by the gap (left) and negative startle suppression (right) from the same animal 3 days before and 3 days after noise exposure, respectively. Filled traces represent an average of 9 trials of stimulus without gap (purple) and with gap (orange). Gray rectangle represents the 50ms startle stimulus. D-E) GPIAS index for all frequencies tested 3 days before (o) and 3 days after (x) noise exposure for sham (D) and noise-induced tinnitus (E) mice. F) The frequency with largest difference in startle suppression before and after noise exposure was used for quantification of group GPIAS performance. Sham animals show no difference in GPIAS performance before and after noise exposure (left, n=11), while noise-induced tinnitus mice (right) show a significant decrease in startle suppression by the silent gap (Wilcoxon test, n = 11, p = 9.8e-04). G) The frequency with largest difference in startle suppression before and after noise-exposure varied between individual noise-induced tinnitus mice.

636 (p = 1.0e-02; Figure 4B). We found an overall effect of  
 637 group (including all treatments and both clicks) in the N40  
 638 amplitude, where noise-induced tinnitus animals showed  
 639 a greater average when compared to sham-exposed mice  
 640 (sham-exposed amplitude: 156.3±8.7μV; noise-induced

tinnitus amplitude: 220.7±17.4μV, p = 6.3e-03; Kruskal-  
 Wallis; Figure 4C, Figure S2A). Taken together, these  
 results indicate that nicotine has a more pronounced effect  
 on the filtering of repetitive stimuli in noise-induced  
 tinnitus animals compared to sham animals, and that

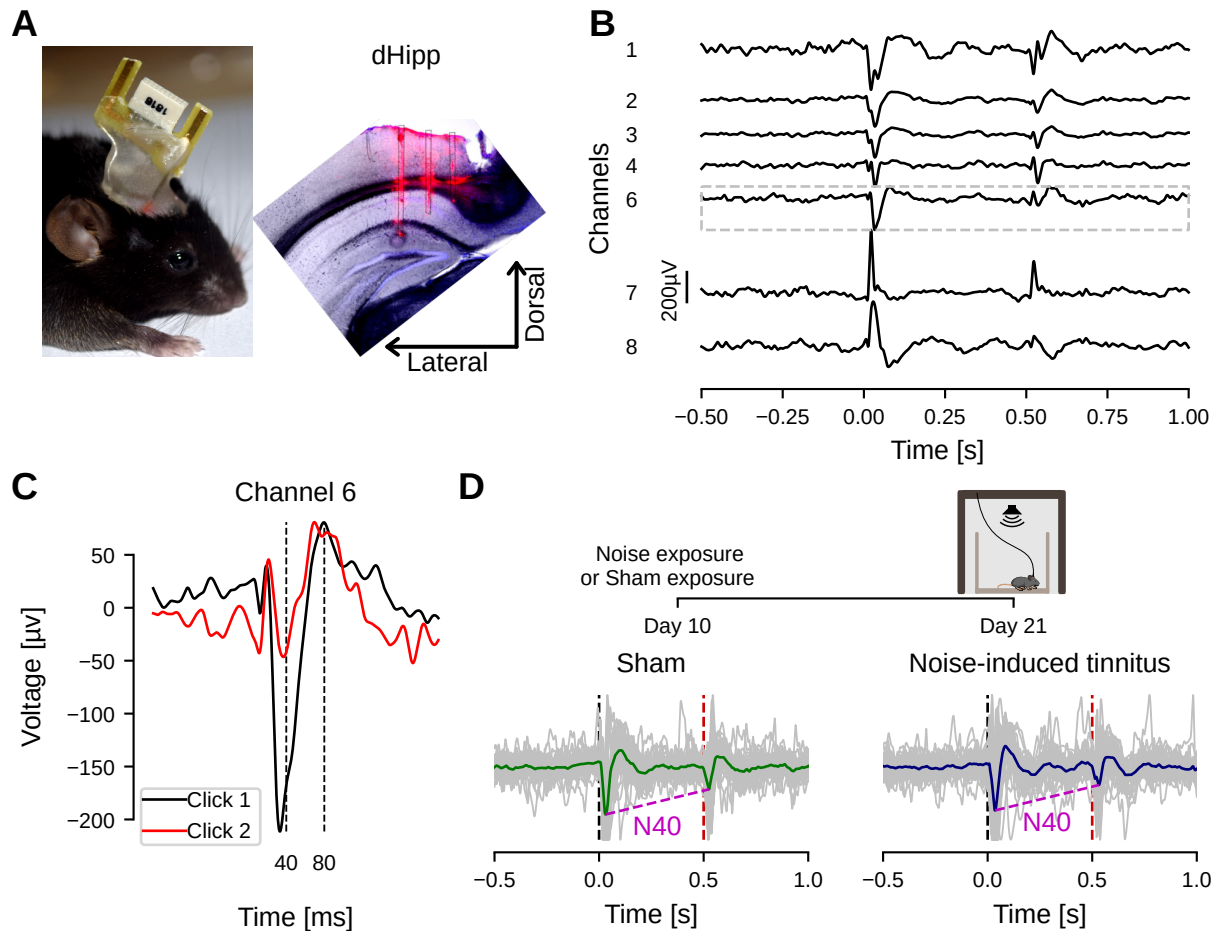

**Figure 3:** Auditory event-related potentials in sham and noise-induced tinnitus mice. A) Left, image of a mouse implanted with an electrode array. Right, coronal slice showing the dorsal hippocampus with electrode tracts stained with DiI in the CA1 region. B) Average aERPs in response to paired clicks from 8 channels at different depths from a recording session from a single animal. The channel above phase reversal (gray dotted box) was consistently used for aERP quantification. C) The reversal channel from ‘B’ at a greater magnification with click 1 (black) and 2 (red) responses superimposed. Dashed lines indicating positive and negative peaks at different characteristic latencies (N40 and P80 components). D) Top, simplified experimental timeline. Bottom, average traces of click responses in saline condition for sham (green,  $n = 10$ ) and noise-induced tinnitus animals (blue,  $n = 7$ ). Superimposed gray traces are the average response of 50 trials from each individual animal, dashed lines indicate the sound stimuli onset and amplitude difference of N40 peaks.

646 the combination of nicotine + cannabis extract strongly  
 647 enhances the first and second click ratio in noise-induced  
 648 tinnitus animals, an effect not seen in sham animals.

649 Examining latency of the N40 component showed no  
 650 differences in pairwise comparisons between clicks after  
 651 any particular treatment ( $p > 0.05$ ; Figure S2B) although  
 652 the distribution of latencies showed the second N40 latency  
 653 to be consistently shorter compared to the first (ANOVA-  
 654 type statistic = 9.0449,  $DF = 1$ ,  $p = 2.6e-03$ ). Comparing  
 655 the ratio of the first and second click latency revealed an  
 656 increased response-delay in noise-induced tinnitus animals  
 657 under cannabis treatment compared to sham animals in  
 658 the same treatment ( $p = 3.0e-03$ ) and compared to noise-  
 659 induced tinnitus mice after nicotine administration ( $p =$   
 660  $3.2e-02$ ; Figure 4D). This shows that cannabis delays the  
 661 N40 latency compared to nicotine in noise-induced tinni-

tus animals but not in sham animals (Figure 4D). Overall,  
 an effect of group on latency (including all treatments  
 and both clicks) was found, where latency was increased  
 for noise-induced tinnitus mice (sham-exposed latency:  
 $29.9 \pm 0.9$  ms, noise-induced tinnitus latency:  $32.9 \pm 0.9$  ms,  
 $p = 4.3e-02$ , Kruskal-Wallis; Figure 4E).

The P80 component of auditory ERP has been impli-  
 cated in the NMDA dysfunction theory in schizophrenia,  
 as ketamine can alter the P80 amplitude of mice (Con-  
 nolly et al., 2004). The P80 component in response to  
 the second click was consistently smaller compared to  
 the response to the first stimulus ( $F(1,20) = 6.156$ ,  $p =$   
 $2.2e-02$ ). Also, the latency for the peak was reduced by  
 the repetition of stimuli for both groups and all treat-  
 ments ( $F(1,20) = 9.79$ ,  $p = 5.2e-03$ ). However, pairwise  
 comparisons did not show any statistical differences for

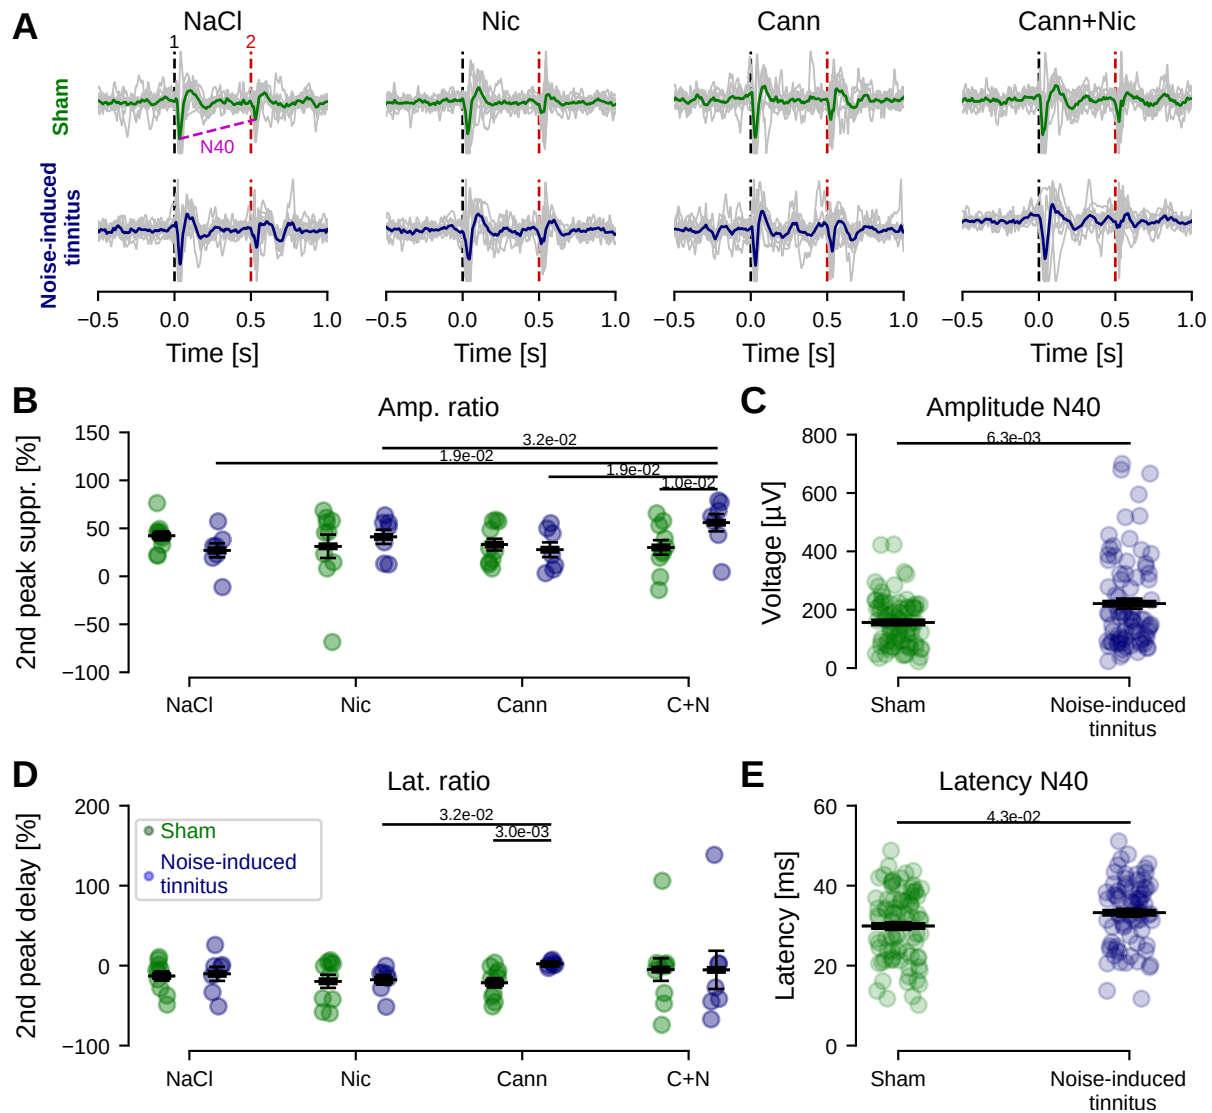

**Figure 4:** Auditory ERPs are larger and slower in noise-induced tinnitus mice after cannabis+nicotine treatment compared to sham mice. A) Auditory ERP recorded in awake mice in response to saline, nicotine, cannabis and cannabis+nicotine show characteristic suppression of the second click in both sham (top) and noise-exposed tinnitus (bottom) animals. Gray trace shows the average aERP per animal while the green and blue traces show the group average for each treatment. B) Percentage of suppression of the second click of the N40 component (supplementary Figure S2) for sham (green) and noise-induced tinnitus (blue) mice, showing largest suppression of the second peak in noise-induced tinnitus mice following cannabis+nicotine administration (Wilcoxon test). C) Group average of the N40 amplitude of sham ( $n = 10$ ) and noise-induced tinnitus animals ( $n = 7$ ) for both click 1 and click 2 for all pharmacological treatments (Kruskal-Wallis test). D) Percentage of the second N40 peak delay for both groups at each treatment showed cannabis extract to increase delay in noise-induced tinnitus mice compared to sham, as well as compared to nicotine treatment of noise-induced tinnitus mice (Wilcoxon test). E) Group average N40 latency for sham ( $n = 10$ ) and noise-induced tinnitus animals ( $n = 7$ ) for both click 1 and click 2 for all pharmacological treatments (Kruskal-Wallis test).

678 the P80 baseline to peak amplitude or latency (Figure  
 679 5A; Figure S3) nor in ratios between the two clicks for  
 680 the P80 amplitude (Figure 5B) and latency (Figure 5D).  
 681 This indicates that the P80 component is not affected by  
 682 noise-induced tinnitus.

683 As previous studies suggested that the improvement of  
 684 sensory gating by pharmacological agents is mediated by  
 685 an enhancement of the first click rather than by the sup-  
 686 pression of the second click (Amann et al., 2008; Rudnick  
 687 et al., 2010), we separated the analysis of aERPs to focus

on each click response (first; click 1 and repeated; click 2) 688  
 by comparing the amplitude and latency of the N40 or P80 689  
 components between different treatments (Figure 6; Fig- 690  
 ure S4). First, we found that sham animals increase the 691  
 response to the first click after cannabis extract + nicotine 692  
 treatment compared to just nicotine administration ( $p =$  693  
 $4e-03$ ; Figure 6A, top left). For the noise-induced tinnitus 694  
 group, the combination of cannabis extract + nicotine 695  
 increased click 1 amplitude compared to NaCl ( $p=1.2e-02$ ; 696  
 Figure 6A, top right). In noise-induced tinnitus mice 697

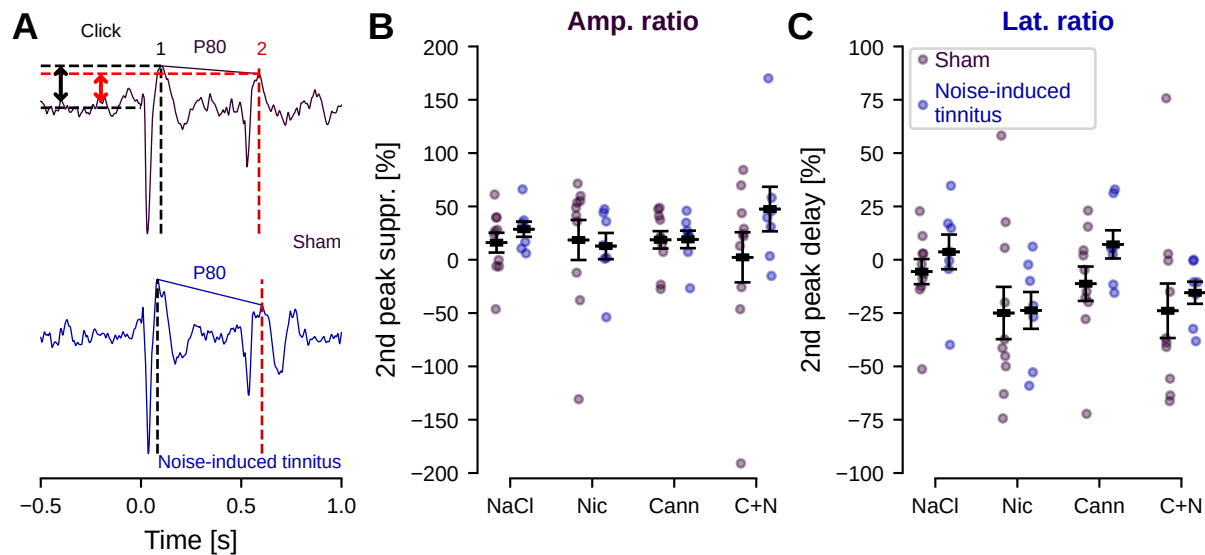

**Figure 5:** The P80 aERP amplitude and latency was not affected by noise-exposure or by nicotine and/or cannabis extract treatment. A) Representative trace highlighting the P80 component (vertical black and red dashed lines for first and second clicks, respectively). Arrows represent the calculated amplitude for each P80 response for the top trace. B) The percentage of second peak amplitude suppression showed no difference between sham and noise-induced tinnitus mice. C) Second P80 peak delay (ratio of the 1st and 2nd click responses latencies) for sham (purple) and noise-induced tinnitus (blue) animals showed no difference between groups or treatments. A negative 'delay' refers to a peak advancement. Wilcoxon test,  $n = 10$  sham and 7 noise-induced tinnitus mice,  $p > 0.05$  for all comparisons.

698 there was no increase in click 1 response by nicotine, but  
 699 still nicotine had an effect in the combination of cannabis  
 700 extract since the combination of the two increased the  
 701 response amplitude significantly compared to cannabis  
 702 extract alone ( $p = 4.7e-02$ ; Figure 6A, top right). Next,  
 703 examining the repeated click 2 response, showed that  
 704 pharmacological treatments only had effects in the sham  
 705 group. The cannabis extract increased the N40 click 2 re-  
 706 sponse amplitude compared to nicotine ( $p = 2.7e-02$ ) and  
 707 cannabis extract + nicotine also increased the N40 click  
 708 2 amplitude compared to nicotine alone ( $p=6e-03$ ; Figure  
 709 6A, bottom left). For noise-induced tinnitus mice the  
 710 second click was unaltered by nicotine and/or cannabis  
 711 extract (Figure 6A, bottom right). Examining the latency  
 712 of the N40 response to the first click instead showed not  
 713 alteration by either treatment in the sham group. For the  
 714 noise-induced tinnitus group, cannabis extract + nicotine  
 715 significantly delayed the click 1 N40 response compared to  
 716 NaCl ( $p = 3.1e-02$ ; Figure 6B, top right). For the repeated  
 717 click 2 latency, the sham group instead showed decreased  
 718 latency in the presence of cannabis extract compared to  
 719 NaCl treatment ( $p = 1.4e-02$ ; Figure 6B, bottom left).  
 720 Again, the latency of the second click N40 response was  
 721 not affected by nicotine and/or cannabis extract in noise-  
 722 induced tinnitus mice (Figure 6B, bottom right). Next,  
 723 examining the P80 amplitude and latency in detail only  
 724 showed one effect on the second click latency for noise-  
 725 induced tinnitus mice where cannabis extract + nicotine

marginally increased the latency of P80 click 2 response  
 compared to nicotine alone ( $p = 4.9e-02$ ; Figure S4). All  
 together we found the repeated second click N40 response  
 to not be consistently modulated by treatment in noise-  
 induced tinnitus mice, thereby agreeing with previous  
 literature that pharmacological improvement of sensory  
 gating affects the first click response (Amann et al., 2008;  
 Rudnick et al., 2010).

Lastly we quantified the inter-peak interval (latency be-  
 tween the N40 and P80 peaks) of the response to the paired  
 clicks (Figure S5). When double peaks were present, we  
 measured latency from the first peak in the doublet (Fig-  
 ure S5A). We did not see any difference in the number of  
 double N40 peaks recorded from sham and noise-induced  
 tinnitus animals ( $p > 0.07$  for all conditions tested; Figure  
 S5B). Also, there were no significant differences in the  
 inter-peak interval between negative and positive aERP  
 for either treatments or groups ( $F(1,20) < 2.06$ ,  $p > 0.1$ ;  
 Figure S5C). Thereby the average aERP waveform ap-  
 pears robust for latencies, despite individual variability.  
 We confirmed our results by deriving the functional princi-  
 pal components from aERP data from a subset of animals  
 where the pharmacologic treatment was found to affect  
 the shape and smoothness specifically of the N40 compo-  
 nent of auditory ERPs (effect size,  $\eta^2 = 0.118$ ,  $F(3,30) =$   
 $3.776$ ,  $p = 2.1e-02$ ; Figure S6).

Taken together, this study found mice with noise-  
 induced tinnitus to normally gate repetitive auditory stim-

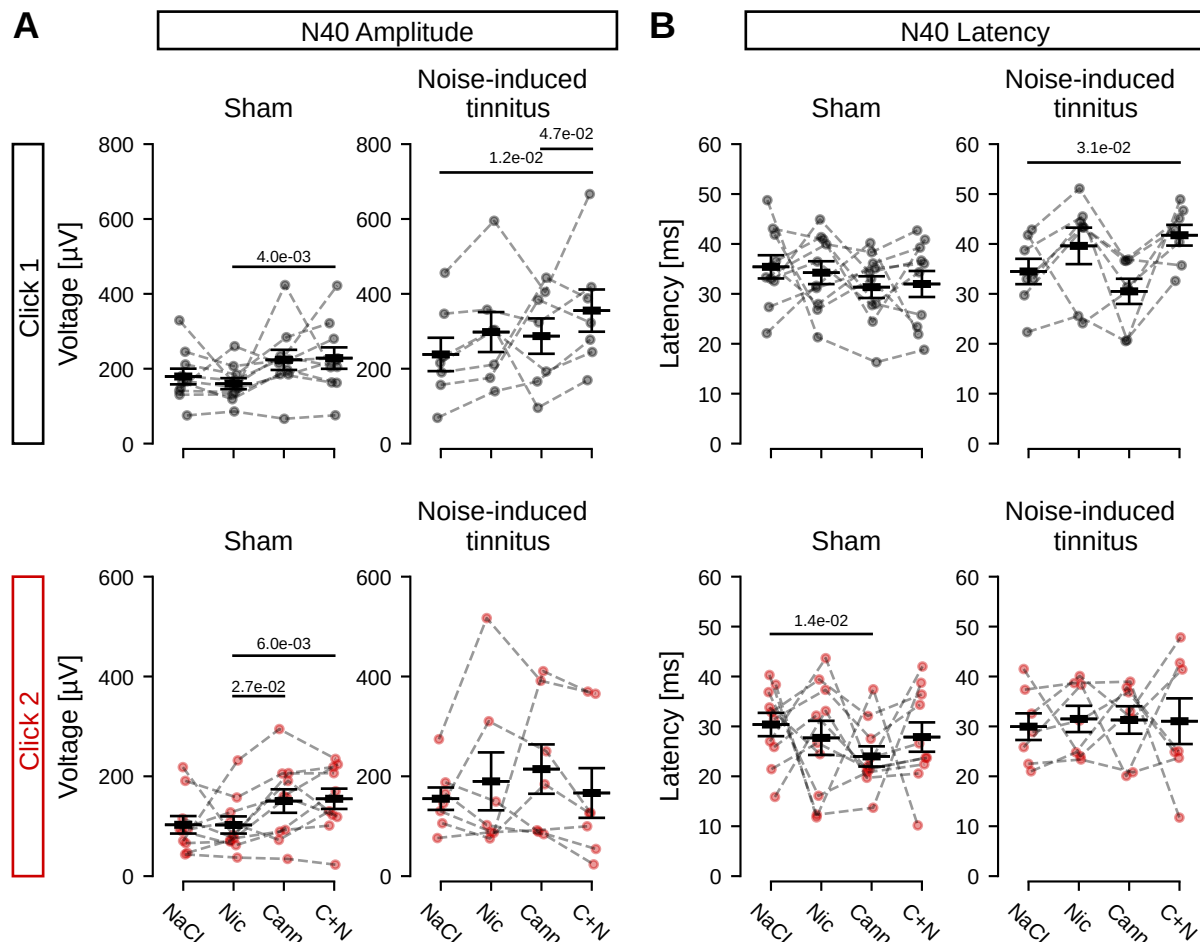

**Figure 6:** Noise-induced tinnitus mice only show modulation of the first click N40 response following cannabis+nicotine treatment. A) Comparison of the N40 amplitude in response to the first click (top) and second click (bottom) after saline, nicotine, cannabis extract and cannabis+nicotine administration for sham (left) and noise-induced tinnitus (right) mice. B) Latency comparisons between the first (top) and second (bottom) click responses in sham (left) and noise-induced tinnitus (right) animals across treatments. Only sham animals showed alterations of the second click amplitude and latency upon nicotine and cannabis treatment. Wilcoxon test,  $n = 10$  sham and 7 noise-induced tinnitus mice.

754 uli, but showing larger amplitudes and slower processing of  
 755 attention to repetitive clicks after pharmacological pertur-  
 756 bations of the cholinergic and endocannabinoid systems,  
 757 compared to sham-treated animals. The modulation of  
 758 aERPs under nicotine and/or cannabis treatment was  
 759 specifically related to the first click of the N40 component  
 760 amplitude in noise-induced tinnitus mice.

## 761 Discussion

762 Using a mouse model of noise-induced tinnitus in ab-  
 763 sence of hearing threshold changes, we found that the  
 764 N40 amplitude and latency is increased in animals with  
 765 behavioral evidence of tinnitus. These mice showed in-  
 766 creased ratio of the amplitude of first and second click N40  
 767 components upon cannabis and nicotine administration  
 768 compared to sham animals, which indicates improvement  
 769 in sensory gating. Cannabis administration also increased

the latency ratio of the N40 component of aERPs for tin-  
 nitus compared to sham mice, indicating altered tempo-  
 ral processing. Our findings imply that the cholinergic and  
 endocannabinoid systems are involved in perturbed sound  
 processing in noise-induced tinnitus.

Tinnitus is a highly heterogeneous condition in humans  
 (Cederroth et al., 2019), and the underlying pathophysio-  
 logical mechanisms remain unclear. Recent evidence in  
 animals and humans cumulate towards the involvement of  
 the limbic system in tinnitus (Chen et al., 2015), however  
 the confounding effects of hearing loss and hyperacusis  
 make the disentangling of each contributing factor on the  
 outcomes quite challenging (Khan et al., 2021). Here, we  
 used a mouse model of noise-induced tinnitus in which  
 hearing thresholds are kept at normal levels two days after  
 noise-exposure, in order to avoid the confounding effect  
 of hearing loss in temporal processing. To our knowledge,  
 this is the first study to investigate sensory gating in the

788 hippocampus in mice with behavioral evidence of tinnitus  
789 and to evaluate how the cholinergic and endocannabinoid  
790 system interferes with sensory gating in these animals.  
791 A strength of this study is that hippocampal location  
792 for quantifying aERPs was standardized by anatomical  
793 post hoc examination and by electrophysiological profile  
794 (Scheffer-Teixeira et al., 2012) at each treatment session,  
795 thereby opening up for systematically testing a variety  
796 of compounds affecting limbic processing of attention to  
797 sound.

798 This study has several limitations. The assessment of  
799 tinnitus relied on GPIAS, which has been validated in rats  
800 against conditioning behavioral paradigms. In mice, such  
801 comparisons are lacking, and it remains unclear whether  
802 such measures truly reflect tinnitus. Previous studies con-  
803 ducted on CD-1 or CBA/CaJ mice exposed to noise, have  
804 revealed neural correlates for tinnitus in animals with im-  
805 paired suppression of the startle by the gap (Li et al., 2013;  
806 Longenecker and Galazyuk, 2011), although these specific  
807 genetic backgrounds are not prone to an effective PPI or  
808 GPIAS (Yu et al., 2016) suggesting a very poor temporal  
809 processing in these strains. Evidence of reliable GPIAS  
810 after noise-induced tinnitus in C57BL/6J mice is to our  
811 knowledge missing. Yu et al. (2016) have shown reliable  
812 GPIAS in C57BL/6J at baseline and moderately impaired  
813 GPIAS after salicylate administration, suggestive of a  
814 mild tinnitus. Here, noise-induced tinnitus did not yield  
815 any specific tinnitus-like tone, rather it was spread over  
816 various frequencies. However, our ABR measures were  
817 limited to 16 kHz, due to speaker limitations, therefore  
818 hearing loss may have occurred at higher frequencies. We  
819 used a paradigm to select the most impacted frequency as  
820 a means to infer tinnitus in individual animals, however a  
821 proper validation of this approach is needed. Indeed, stud-  
822 ies in animals and humans suggest that an increased ABR  
823 wave 5 latency is associated with tinnitus (Möhrle et al.,  
824 2019; Edvall et al., 2022). In spite of the lack of threshold  
825 changes after noise exposure, we found no evidence of such  
826 latency changes, nor lower Wave 1 amplitude as suggested  
827 in the literature as an indirect measure of synaptopathy  
828 (Kujawa and Liberman, 2009), potentially involved in  
829 tinnitus (Tziridis et al., 2021). It is thus possible that  
830 the tinnitus phenotype defined here is too mild to be  
831 correlated with alterations reminiscent of neural plasticity  
832 changes in the midbrain. Nonetheless, the hippocampal  
833 recordings performed here robustly detect alterations in  
834 animals with noise-induced tinnitus compared to sham,  
835 suggesting that the noise exposure had an incidence on  
836 temporal processing.

837 Another limitation is that the direct impact of nico-

tine and the cannabis extract on tinnitus were not as-  
838 sessed after the pharmacological intervention. Indeed,  
839 the connected headstage to collect ERP recordings did  
840 not allow animals to enter the restraining tube used to  
841 measure GPIAS. Previous studies have shown conflicting  
842 results (Zheng and Smith, 2019; Narwani et al., 2020).  
843 For instance, acute injection of the synthetic CB1/CB2  
844 receptor agonists (WIN55,212-2, or CP55,940), exacer-  
845 bate salicylate-induced tinnitus in rats assessed using  
846 a conditioned lick suppression paradigm (Zheng et al.,  
847 2010), whereas acute treatment with the CB1 receptor ago-  
848 nist arachidonyl-2-chloroethylamide (ACEA) had no effect  
849 (as measured by GPIAS) in guinea pigs with salicylate-  
850 induced tinnitus (Berger et al., 2017). It is possible that  
851 the confounding effects of stress on GPIAS measures  
852 caused by either salicylate or cannabis complexify the  
853 behavioral interpretation. Furthermore, cannabis extract  
854 concentration has shown U-shaped dose-response antide-  
855 pressant effects in mice (El-Alfy et al., 2010), thereby  
856 evaluation of dose-dependent effects of activating the en-  
857 docannabinoid system in different tinnitus models, as  
858 well as comparisons of administration routes of cannabis  
859 extract, is necessary in future studies.  
860

861 Here we found that pharmacological manipulations  
862 of aERPs with both nicotine and cannabis extract im-  
863 prove sensory gating in noise-induced tinnitus mice but  
864 not in sham-treated animals. Our findings suggest that  
865 the higher N40 ratio under cannabis extract together with  
866 nicotine treatment in noise-induced tinnitus mice is related  
867 to an elevated click 1 amplitude and a lack of consistent  
868 modulation of the response to the second click, suggesting  
869 an increased registration (sensorial input processing) of  
870 the stimulus (Brockhaus-Dumke et al., 2008). Still, the  
871 cellular mechanisms underlying such alterations in sensory  
872 gating remain poorly understood.

873 In general, the endocannabinoid system dampens neu-  
874 ron activity by activation of Gi-protein coupled presyn-  
875 aptic CB1 receptors that decrease neurotransmitter re-  
876 lease through blocking of presynaptic voltage-gated cal-  
877 cium channels and opening of voltage-gated potassium  
878 (GIRK) channels, allowing potassium to flow out of the  
879 terminal (Kendall and Yudowski, 2016). For example, nat-  
880 ural cannabis extracts can reduce neuronal hyperactivity  
881 in in vitro models of spasticity and epilepsy (Wilkinson  
882 et al., 2003) which is interesting since noise-induced tin-  
883 nitus is related to neuronal hyperactivity of the auditory  
884 system (Shore et al., 2016). Still, the circuit effect of CB1  
885 receptor activation depends on what type of presynaptic  
886 neuron expresses CB1 receptors (etc. glutamatergic or  
887 GABAergic cells) which can affect local plasticity differ-

888 ently (Kano, 2014). It is known that pyramidal cells of the  
889 hippocampus have relatively low expression of CB1 recep-  
890 tors (Kano et al., 2009) therefore we expect the cannabis  
891 extract to increase auditory input due to decreased in-  
892 hibition, since CB1 receptors are strongly coexpressed  
893 with GAD65 in the hippocampus (Kano et al., 2009; Li  
894 et al., 2020), especially with strong CB1R expression on  
895 cholecystokinin positive interneurons (Li et al., 2020).

896 Furthermore this study use a THC-rich extract, which  
897 needs to be put in contrast to anxiolytic evaluation of  
898 THC at much lower doses (Kasten et al., 2019) and stud-  
899 ies of seizure reduction by THC at doses as high as 100  
900 mg/kg (Rosenberg et al., 2017). Still the concentration  
901 of THC in a cannabis extract cannot be compared to  
902 THC alone, but should be considered in relation to other  
903 cannabinoids present. For example, a systematic review  
904 of cannabinoid treatment of chronic pain found products  
905 with high-THC-to-CBD ratios the most useful for short-  
906 term relief of neuropathic chronic pain (McDonagh et al.,  
907 2022).

908 Here, we found the ability to suppress repetitive audi-  
909 tory stimuli to be preserved in noise-exposed mice, sug-  
910 gesting that noise-induced tinnitus without changes in  
911 hearing thresholds does not interfere with auditory gating;  
912 but that noise-induced tinnitus renders the response to  
913 auditory clicks abnormal in the presence of cannabis by  
914 delaying temporal coding. We also found that nicotine  
915 improves amplitude-ratio of aERPs in noise-exposed tin-  
916 nitus mice, but in general, smoking is associated with  
917 greater risk of tinnitus (Biswas et al., 2022). Interest-  
918 ingly, human subjects administered orally a combination  
919 of a THC analog and nicotine have shown improved au-  
920 ditory deviant detection and mismatch negativity ERPs,  
921 but not when each drug was delivered alone (Salle et al.,  
922 2019). This interplay between the cholinergic and endo-  
923 cannabinoid system has been shown in basal forebrain  
924 cholinergic neurons expressing CB1Rs (Harkany et al.,  
925 2003). In detail, isolated cell studies showed decreased  
926 nicotinic currents generated by nicotinic  $\alpha 7$  and  $\alpha 4\beta 2$   
927 subunit containing acetylcholine receptors in the presence  
928 of the endocannabinoid anandamide (Spivak et al., 2007).

## Conflict of Interest Statement

The authors declare that the research was conducted in the absence of any commercial or financial relationships that could be construed as a potential conflict of interest.

929 This could explain why the co-administration of nicotine  
930 and cannabis extract improves gating when compared  
931 to each isolated compound. Still, how the combination  
932 of nicotine and cannabis extract affects tinnitus patients  
933 needs to be better understood.

934 There has been an increased interest in studying the  
935 endocannabinoid system in animals models of tinnitus  
936 (Berger et al., 2017; Narwani et al., 2020). Due to the  
937 availability of a transgenic line targeting Cre expression at  
938 cells expressing the alpha-2 nicotinic receptor (Leao et al.,  
939 2012), the role of the cholinergic system in tinnitus could  
940 be investigated by using chemogenetics to locally manipu-  
941 late the excitability of these cells during aERP recordings;  
942 or in tinnitus induction performing similar manipulations  
943 during noise exposure. A similar approach would be dif-  
944 ficult for investigating the role of the endocannabinoid  
945 system in tinnitus due to the unavailability of specific tar-  
946 geting of, for example, CB1-expressing cells. However, the  
947 depletion of GLAST to exacerbate the tinnitus phenotype,  
948 may also be more appropriate to investigate in greater  
949 details the underlying cellular and molecular mechanisms  
950 (Yu et al., 2016). Still, it is becoming clear that loud noise  
951 activates both auditory and limbic pathways (Zhang et al.,  
952 2018) but how prolonged noise-exposure alters sound pro-  
953 cessing of each system needs to be further examined, as  
954 well as how the limbic and auditory systems interact in  
955 tinnitus (Qu et al., 2019).

956 In conclusion, our study shows that provoking au-  
957 ditory event-related potentials pharmacologically, using  
958 nicotine and/or cannabis extract rich in THC, showed  
959 noise-induced tinnitus mice to improve gating of the N40  
960 component especially under the combined influence of  
961 cannabis extract and nicotine, by increasing the first click  
962 response amplitude. However, cannabis extract also in-  
963 creased the latency ratio of the N40 component in noise-  
964 induced tinnitus mice compared to sham animals, indicat-  
965 ing delayed temporal processing of paired clicks. Thereby  
966 the activation of the cholinergic and endocannabinoid sys-  
967 tem have distinct and different effects on auditory gating  
968 in the context of tinnitus.

## Author Contributions

KEL and BC designed the study. BC and TM performed experiments; SRBS analyzed the cannabis extract; BC, TM and TZL analyzed the data; BC, CRC and KEL wrote the manuscript with important input from TM and TZL.

## Funding

This work is supported by the American Tinnitus Association and the Brazilian funding agency CAPES - Coordenação de Aperfeiçoamento de Pessoal de Nível Superior. CRC is supported by the GENDER-Net Co-Plus Fund (GNP-182), the European Union's Horizon 2020 Research and Innovation Programme, Grant Agreement No 848261 and the European Union's Horizon 2020 research and innovation programme under the Marie Skłodowska-Curie grant agreement No 722046. TM is supported by the Wenner-Gren Stiftelserna (UPD2020-0006 and UPD2021-0114).

## Acknowledgments

The authors thank Dr Cláudio Queiroz at the Brain Institute-UFRN for providing the cannabis extract and Dr Jessica Winne for technical assistance in electrode manufacturing.

## Data Availability Statement

The datasets generated and/or analyzed in the current study are available on request. Recordings were done using the Open-ephys GUI (Siegle et al., 2015). Stimulation and data analysis were performed using SciScripts (Malfatti, 2022), Scipy (Virtanen et al., 2020) and Numpy (Harris et al., 2020). Statistical analysis used for functional data analysis (Figure S6) was carried out with R software (R Core Team, 2020) and the functional data analysis package (Ramsay et al., 2009). All plots were produced using Matplotlib (Hunter, 2007), and schematics were done using Inkscape (Inkscape Project, 2022). All scripts used for recordings and analysis are available online (Ciralli et al., 2022).

## References

- Amann, L. C., Phillips, J. M., Halene, T. B., and Siegel, S. J. (2008). Male and female mice differ for baseline and nicotine-induced event related potentials. *Behavioral neuroscience* 122, 982
- Asokan, M., Williamson, R., Hancock, K., and Polley, D. (2018). Sensory overamplification in layer 5 auditory corticofugal projection neurons following cochlear nerve synaptic damage. *Nat. Commun* 9, 2468. doi:10.1038/s41467-018-04852-y.
- Ballinger, E., Ananth, M., Talmage, D., and Role, L. (2016). Basal forebrain cholinergic circuits and signaling in cognition and cognitive decline. *Neuron* 91, 1199–1218. doi: 10.1016/j.neuron.2016.09.006.
- Berger, J. I., Coomber, B., Hill, S., Alexander, S. P., Owen, W., Palmer, A. R., et al. (2017). Effects of the cannabinoid cb1 agonist acea on salicylate ototoxicity, hyperacusis and tinnitus in guinea pigs. *Hearing research* 356, 51–62
- Biswas, R., Lugo, A., Akeroyd, M. A., Schlee, W., Gallus, S., and Hall, D. (2022). Tinnitus prevalence in europe: a multi-country cross-sectional population study. *The Lancet Regional Health-Europe* 12, 100250
- Böcker, K., Gerritsen, J., Hunault, C., Kruidenier, M., Mensinga, T. T., and Kenemans, J. (2010). Cannabis with high  $\Delta^9$ -thc contents affects perception and visual selective attention acutely: an event-related potential study. *Pharmacology Biochemistry and Behavior* 96, 67–74
- Brockhaus-Dumke, A., Mueller, R., Faigle, U., and Klosterkoetter, J. (2008). Sensory gating revisited: relation between brain oscillations and auditory evoked potentials in schizophrenia. *Schizophr. Res* 99, 238–249. doi:10.1016/j.schres.2007.10.034.
- Campbell, J., Bean, C., and LaBrec, A. (2018). Normal hearing young adults with mild tinnitus: Reduced inhibition as measured through sensory gating. *Audiology research* 8
- Cederroth, C. R., PirouziFard, M., Trpchevska, N., Idrizbegovic, E., Canlon, B., Sundquist, J., et al. (2019). Association of genetic vs environmental factors in swedish adoptees with clinically significant tinnitus. *JAMA Otolaryngology-Head & Neck Surgery* 145, 222. doi:10.1001/jamaoto.2018.3852
- Chen, Y.-C., Li, X., Liu, L., Wang, J., Lu, C.-Q., Yang, M., et al. (2015). Tinnitus and hyperacusis involve hyperactivity and enhanced connectivity in auditory-limbic-arousal-cerebellar network. *elife* 4, e06576. doi:10.7554/elife.06576.001
- Cima, R., Mazurek, B., Haider, H., Kikidis, D., Lapira, A., and Noreña, A. (2019). A multidisciplinary european guideline for tinnitus: diagnostics, assessment, and treatment. *HNO* 67, 10–42. doi:10.1007/s00106-019-0633-7.
- [Dataset] Ciralli, B., Malfatti, T., and Lima, T. Z. (2022). Sensorygatingontinnitus2022. doi:10.5281/ZENODO.6645914
- Connolly, P., Maxwell, C., Liang, Y., Kahn, J., Kanes, S., and Abel, T. (2004). The effects of ketamine vary among inbred mouse strains and mimic schizophrenia for the p80, but not p20 or n40 auditory erp components. *Neurochem. Res* 29, 1179–1188
- Edvall, N., Mehraei, G., Claeson, M., Lazar, A., Bulla, J., and Leineweber, C. (2022). Alterations in auditory brainstem response distinguish occasional and constant tinnitus. *J. Clin. Invest* doi:10.1172/JCI155094.



- El-Alfy, A. T., Ivey, K., Robinson, K., Ahmed, S., Radwan, M., Slade, D., et al. (2010). Antidepressant-like effect of  $\delta 9$ -tetrahydrocannabinol and other cannabinoids isolated from cannabis sativa l. *Pharmacology Biochemistry and Behavior* 95, 434–442. doi:10.1016/j.pbb.2010.03.004
- Harkany, T., Härtig, W., Berghuis, P., Dobszay, M., Zilberter, Y., and Edwards, R. (2003). Complementary distribution of type 1 cannabinoid receptors and vesicular glutamate transporter 3 in basal forebrain suggests input-specific retrograde signalling by cholinergic neurons. *Eur. J. Neurosci* 18, 1979–1992. doi:10.1046/j.1460-9568.2003.02898.x.
- Harris, C. R., Millman, K. J., van der Walt, S. J., Gommers, R., Virtanen, P., Cournapeau, D., et al. (2020). Array programming with NumPy. *Nature* 585, 357–362. doi:10.1038/s41586-020-2649-2
- Henry, K. (1979). Auditory brainstem volume-conducted responses: origins in the laboratory mouse. *J. Am. Aud. Soc* 4, 173–178
- Hiller, W. and Goebel, G. (2006). Factors influencing tinnitus loudness and annoyance. *Arch. Otolaryngol. Head Neck Surg* 132, 1323–1330. doi:10.1001/archotol.132.12.1323.
- Hunter, J. D. (2007). Matplotlib: A 2d Graphics Environment. *Computing in Science & Engineering* 9, 90–95. doi:10.1109/MCSE.2007.55
- [Dataset] Inkscape Project (2022). Inkscape
- Johansson, E., Ohlsson, A., Lindgren, J.-E., Agurell, S., Gillespie, H., and Hollister, L. E. (1987). Single-dose kinetics of deuterium-labelled cannabinal in man after intravenous administration and smoking. *Biological Mass Spectrometry* 14, 495–499. doi:10.1002/bms.1200140904
- Kano, M. (2014). Control of synaptic function by endocannabinoid-mediated retrograde signaling. *Proc. Jpn. Acad. Ser. B Phys. Biol. Sci* 90, 235–250
- Kano, M., Ohno-Shosaku, T., Hashimoto, Y., Uchigashima, M., and Watanabe, M. (2009). Endocannabinoid-mediated control of synaptic transmission. *Physiol. Rev* 89, 309–380. doi:10.1152/physrev.00019.2008.
- Kasten, C., Zhang, Y., and Boehm, S. (2019). Acute cannabinoids produce robust anxiety-like and locomotor effects in mice, but long-term consequences are age- and sex-dependent. *Front. Behav. Neurosci* 13, 32. doi:10.3389/fnbeh.2019.00032.
- Kendall, D. and Yudowski, G. (2016). Cannabinoid receptors in the central nervous system: Their signaling and roles in disease. *Front. Cell. Neurosci* 10, 294. doi:10.3389/fncel.2016.00294.
- Khan, R. A., Sutton, B. P., Tai, Y., Schmidt, S. A., Shahsavarani, S., and Husain, F. T. (2021). A large-scale diffusion imaging study of tinnitus and hearing loss. *Scientific Reports* 11. doi:10.1038/s41598-021-02908-6
- Kujawa, S. G. and Liberman, M. C. (2009). Adding insult to injury: Cochlear nerve degeneration after "temporary" noise-induced hearing loss. *Journal of Neuroscience* 29, 14077–14085. doi:10.1523/jneurosci.2845-09.2009
- Langguth, B., Landgrebe, M., Kleinjung, T., Sand, G., and Hajak, G. (2011). Tinnitus and depression. *World J. Biol. Psychiatry Off. J. World Fed. Soc. Biol. Psychiatry* 12, 489–500. doi:10.3109/15622975.2011.575178.
- Lanting, C., Kleine, E., and Dijk, P. (2009). Neural activity underlying tinnitus generation: results from pet and fmri. *Hear. Res* 255, 1–13. doi:10.1016/j.heares.2009.06.009.
- Leao, R., Mikulovic, S., Leao, K., Munguba, H., Gezelius, H., and Enjin, A. (2012). Olm interneurons differentially modulate ca3 and entorhinal inputs to hippocampal ca1 neurons. *Nat. Neurosci* 15, 1524–1530. doi:10.1038/nn.3235.
- Li, H., Yang, J., Tian, C., Diao, M., Wang, Q., and Zhao, S. (2020). Organized cannabinoid receptor distribution in neurons revealed by super-resolution fluorescence imaging. *Nat. Commun* 11, 5699. doi:10.1038/s41467-020-19510-5.
- Li, S., Choi, V., and Tzounopoulos, T. (2013). Pathogenic plasticity of kv7.2/3 channel activity is essential for the induction of tinnitus. *Proc. Natl. Acad. Sci. U. S. A* 110, 9980–9985. doi:10.1073/pnas.1302770110.
- Lijffijt, M., Lane, S., Meier, S., Boutros, N., Burroughs, S., and Steinberg, J. (2009). P50, n100, and p200 sensory gating: Relationships with behavioral inhibition, attention, and working memory. *Psychophysiology* 46, 1059. doi:10.1111/j.1469-8986.2009.00845.x.
- Longenecker, R. and Galazyuk, A. (2016). Variable effects of acoustic trauma on behavioral and neural correlates of tinnitus in individual animals. *Front. Behav. Neurosci* 10, 207. doi:10.3389/fnbeh.2016.00207.
- Longenecker, R. J. and Galazyuk, A. V. (2011). Development of tinnitus in CBA/CaJ mice following sound exposure. *Journal of the Association for Research in Otolaryngology* 12, 647–658. doi:10.1007/s10162-011-0276-1
- [Dataset] Malfatti, T. (2022). Sciscripts. doi:10.5281/ZENODO.4045872
- Malfatti, T., Ciralli, B., Hilscher, M. M., Leao, R. N., and Leao, K. E. (2022). Decreasing dorsal cochlear nucleus activity ameliorates noise-induced tinnitus perception in mice. *BMC Biology* 20. doi:10.1186/s12915-022-01288-1
- McDonagh, M. S., Morasco, B. J., Wagner, J., Ahmed, A. Y., Fu, R., Kansagara, D., et al. (2022). Cannabis-based products for chronic pain: A systematic review. *Annals of Internal Medicine* doi:https://doi.org/10.7326/M21-4520
- Metzger, K. L., Maxwell, C. R., Liang, Y., and Siegel, S. J. (2007). Effects of nicotine vary across two auditory evoked potentials in the mouse. *Biological psychiatry* 61, 23–30
- Möhrle, D., Hofmeier, B., Amend, M., Wolpert, S., Ni, K., Bing, D., et al. (2019). Enhanced central neural gain compensates acoustic trauma-induced cochlear impairment, but unlikely correlates with tinnitus and hyperacusis. *Neuroscience* 407, 146–169. doi:10.1016/j.neuroscience.2018.12.038
- Narwani, V., Bourdillon, A., Nalamada, K., Manes, R., and Hildrew, D. (2020). Does cannabis alleviate tinnitus? a review of the current literature. *Laryngoscope Investig. Otolaryngol* 5, 1147–1155. doi:10.1002/lio2.479.
- Petersen, D., Norris, K., and Thompson, J. (1984). A comparative study of the disposition of nicotine and its metabolites in three inbred strains of mice. *Drug Metabolism and Disposition* 12, 725–731
- Qu, T., Qi, Y., Yu, S., Du, Z., Wei, W., and Cai, A. (2019). Dynamic changes of functional neuronal activities between the auditory pathway and limbic systems contribute to noise-induced tinnitus with a normal audiogram. *Neuroscience* 408, 31–45. doi:10.1016/j.neuroscience.2019.03.054.

- [Dataset] R Core Team (2020). R: A language and environment for statistical computing
- Ramsay, J., Hooker, G., and Graves, S. (2009). Introduction to functional data analysis. In *Functional Data Analysis with R and MATLAB Use R*, eds. J. Ramsay, G. Hooker, and S. Graves (New York, NY: Springer). 1–19. doi:10.1007/978-0-387-98185-7\_1.
- Rosenberg, E. C., Patra, P. H., and Whalley, B. J. (2017). Therapeutic effects of cannabinoids in animal models of seizures, epilepsy, epileptogenesis, and epilepsy-related neuroprotection. *Epilepsy and Behavior* 70, 319–327. doi:10.1016/j.yebeh.2016.11.006
- Rudnick, N., Strasser, A., Phillips, J., Jepson, C., Patterson, F., and Frey, J. (2010). Mouse model predicts effects of smoking and varenicline on event-related potentials in humans. *Nicotine Tob. Res. Off. J. Soc. Res. Nicotine Tob* 12, 589–597. doi:10.1093/ntr/ntq049.
- Salle, S., Inyang, L., Impey, D., Smith, D., Choueiry, J., and Nelson, R. (2019). Acute separate and combined effects of cannabinoid and nicotinic receptor agonists on mmn-indexed auditory deviance detection in healthy humans. *Pharmacol. Biochem. Behav* 184, 172739. doi:10.1016/j.pbb.2019.172739.
- Sampson, P. B. (2020). Phytocannabinoid pharmacology: Medicinal properties of cannabis sativa constituents aside from the big two. *Journal of Natural Products* 84, 142–160. doi:10.1021/acs.jnatprod.0c00965
- Santos Filha, V. and Matas, C. (2010). Late auditory evoked potentials in individuals with tinnitus. *Braz. J. Otorhinolaryngol* 76, 263–270
- Scheffer-Teixeira, R., Belchior, H., Caixeta, F., Souza, B., Ribeiro, S., and Tort, A. (2012). Theta phase modulates multiple layer-specific oscillations in the ca1 region. *Cereb. Cortex N. Y. N* 22, 2404–2414. doi:10.1093/cercor/bhr319.
- Shore, S., Roberts, L., and Langguth, B. (2016). Maladaptive plasticity in tinnitus—triggers, mechanisms and treatment. *Nat. Rev. Neurol* 12, 150–160. doi:10.1038/nrneurol.2016.12.
- Siegle, J. H., Hale, G. J., Newman, J. P., and Voigts, J. (2015). Neural ensemble communities: open-source approaches to hardware for large-scale electrophysiology. *Current Opinion in Neurobiology* 32, 53–59. doi:10.1016/j.conb.2014.11.004
- Spivak, C., Lupica, C., and Oz, M. (2007). The endocannabinoid anandamide inhibits the function of alpha4beta2 nicotinic acetylcholine receptors. *Mol. Pharmacol* 72, 1024–1032. doi:10.1124/mol.107.036939.
- Sturm, J., Zhang-Hooks, Y.-X., Roos, H., Nguyen, T., and Kandler, K. (2017). Noise trauma-induced behavioral gap detection deficits correlate with reorganization of excitatory and inhibitory local circuits in the inferior colliculus and are prevented by acoustic enrichment. *J. Neurosci. Off. J. Soc. Neurosci* 37, 6314–6330. doi:10.1523/JNEUROSCI.0602-17.2017.
- Tai, Y. and Husain, F. T. (2019). The role of cognitive control in tinnitus and its relation to speech-in-noise performance. *Journal of audiology & otology* 23, 1
- Torrens, A., Vozella, V., Huff, H., McNeil, B., Ahmed, F., and Ghidini, A. (2020). Comparative pharmacokinetics of  $\Delta$ 9-tetrahydrocannabinol in adolescent and adult male mice. *J. Pharmacol. Exp. Ther* 374, 151–160. doi:10.1124/jpet.120.265892.
- Turner, J., Brozoski, T., Bauer, C., Parrish, J., Myers, K., and Hughes, L. (2006). Gap detection deficits in rats with tinnitus: a potential novel screening tool. *Behav. Neurosci* 120, 188–195. doi:10.1037/0735-7044.120.1.188.
- Tziridis, K., Forster, J., Buchheidt-DÄ¶rfler, I., Krauss, P., Schilling, A., Wendler, O., et al. (2021). Tinnitus development is associated with synaptopathy of inner hair cells in mongolian gerbils. *European Journal of Neuroscience* 54, 4768–4780. doi:10.1111/ejn.15334
- Verrico, C., Jentsch, J., Roth, R., and Taylor, J. (2004). Repeated, intermittent delta(9)-tetrahydrocannabinol administration to rats impairs acquisition and performance of a test of visuospatial divided attention. *Neuropsychopharmacol. Off. Publ. Am. Coll. Neuropsychopharmacol* 29, 522–529. doi:10.1038/sj.npp.1300316.
- Virtanen, P., Gommers, R., Oliphant, T. E., Haberland, M., Reddy, T., Cournapeau, D., et al. (2020). SciPy 1.0: Fundamental Algorithms for Scientific Computing in Python. *Nature Methods* 17, 261–272. doi:10.1038/s41592-019-0686-2
- Wilkinson, J., Whalley, B., Baker, D., Pryce, G., Constanti, A., and Gibbons, S. (2003). Medicinal cannabis: is  $\Delta$ 9-tetrahydrocannabinol necessary for all its effects? *J. Pharm. Pharmacol* 55, 1687–1694. doi:10.1211/0022357022304.
- Xu, C., Chang, T., Du, Y., Yu, C., Tan, X., and Li, X. (2019). Pharmacokinetics of oral and intravenous cannabidiol and its antidepressant-like effects in chronic mild stress mouse model. *Environmental Toxicology and Pharmacology* 70, 103202. doi:10.1016/j.etap.2019.103202
- Yu, H., Vikhe Patil, K., Han, C., Fabella, B., Canlon, B., and Someya, S. (2016). Glax deficiency in mice exacerbates gap detection deficits in a model of salicylate-induced tinnitus. *Front. Behav. Neurosci* 10, 158. doi:10.3389/fnbeh.2016.00158.
- Zeng, F., Richardson, M., and Turner, K. (2020). Tinnitus does not interfere with auditory and speech perception. *J. Neurosci* doi:10.1523/JNEUROSCI.0396-20.2020.
- Zhang, G.-W., Sun, W.-J., Zingg, B., Shen, L., He, J., Xiong, Y., et al. (2018). A non-canonical reticular-limbic central auditory pathway via medial septum contributes to fear conditioning. *Neuron* 97, 406–417.e4. doi:10.1016/j.neuron.2017.12.010
- Zhang, W., Peng, Z., Yu, S., Song, Q.-L., Qu, T.-F., Liu, K., et al. (2020). Exposure to sodium salicylate disrupts VGLUT3 expression in cochlear inner hair cells and contributes to tinnitus. *Physiological Research* , 181–190doi:10.33549/physiolres.934180
- Zheng, Y. and Smith, P. (2019). Cannabinoid drugs: will they relieve or exacerbate tinnitus? *curr. Opin. Neurol* 32, 131–136. doi:10.1097/WCO.0000000000000631.
- Zheng, Y., Stiles, L., Hamilton, E., Smith, P., and Darlington, C. (2010). The effects of the synthetic cannabinoid receptor agonists, win55,212-2 and cp55,940, on salicylate-induced tinnitus in rats. *Hear. Res* 268, 145–150. doi:10.1016/j.heares.2010.05.015.
