# Alterations of auditory sensory gating in mice with noise-induced tinnitus treated with nicotine and cannabis extract

Barbara Ciralli<sup>1</sup>, Thawann Malfatti<sup>1,3</sup>, Thiago Z. Lima<sup>1,2</sup>, Sérgio Ruschi B. Silva<sup>1</sup>, Christopher R. Cederroth<sup>3,4</sup>, Katarina E. Leao<sup>1\*</sup>

<sup>1</sup>Brain Institute, Federal University of Rio Grande do Norte, Natal, RN, Brazil

<sup>2</sup>Department of Applied Mathematics and Statistics, Exact and Earth Sciences Center, Federal University of Rio Grande do Norte, Natal, RN, Brazil

<sup>3</sup>Experimental Audiology, Department of Physiology and Pharmacology, Karolinska Institutet, 171 77 Stockholm, Sweden

<sup>4</sup>Translational Hearing Research, Tübingen Hearing Research Center, Department of Otolaryngology, Head and Neck Surgery, University of Tübingen, Tübingen, Germany.

\*katarina.leao@neuro.ufrn.br

Brain Institute, Federal University of Rio Grande do Norte, Av. Senador Salgado Filho, 3.000, Campus Universitário Lagoa Nova, CEP 59078-970, postal box 1524, Natal-RN, Brazil

## Abstract

1 Tinnitus is a phantom sound perception affecting both auditory and limbic structures. The mechanisms of tinnitus  
2 remain unclear and it is debatable whether tinnitus alters attention to sound and the ability to inhibit repetitive  
3 sounds, a phenomenon also known as auditory gating. Here we investigate if noise exposure interferes with auditory  
4 gating and whether natural extracts of cannabis or nicotine could improve auditory pre-attentional processing in  
5 noise-exposed mice. We used 22 male C57BL/6J mice divided into noise-exposed (exposed to a 9-11 kHz narrow  
6 band noise for 1 hour) and sham (no sound during noise exposure) groups. Hearing thresholds were measured using  
7 auditory brainstem responses, and tinnitus-like behavior was assessed using Gap prepulse inhibition of acoustic  
8 startle. After noise exposure, mice were implanted with multi-electrodes in the dorsal hippocampus to assess auditory  
9 event-related potentials in response to paired clicks. The results showed that mice with tinnitus-like behavior displayed  
10 auditory gating of repetitive clicks, but with larger amplitudes and longer latencies of the N40 component of the  
11 aERP waveform. The combination of cannabis extract and nicotine improved auditory gating ratio in noise-exposed  
12 mice without permanent hearing threshold shifts. Lastly, the longer latency of the N40 component appears due  
13 to an increased sensitivity to cannabis extract in noise-exposed mice compared to sham mice. The study suggests  
14 that the altered central plasticity in tinnitus is more sensitive to the combined actions on the cholinergic and the  
15 endocannabinoid systems. Overall, the findings contribute to a better understanding of pharmacological modulation  
16 of auditory sensory gating.

Keywords: Tinnitus, Hippocampus, auditory event-related potentials, ABR, GPIAS

## 17 Introduction

18 Subjective tinnitus is a phantom sound sensation without  
19 an external source that is related to comorbidities such  
20 as anxiety and depression [1] and decreased quality of  
21 life [2]. Tinnitus affects around 15% of the world popu-  
22 lation [3] and so far cognitive behavioral therapy is the  
23 only evidence-based recommended treatment [4]. A rela-  
24 tionship between tinnitus and decreased understanding  
25 of speech-in-noise has been reported [5] but it remains  
26 unclear whether chronic tinnitus directly interferes with  
27 speech-in-noise processing [6], or whether this is a result  
28 of attentional problems that have been difficult to assess  
29 in tinnitus subjects [5]. The limbic system is implicated  
30 in the manifestation and development of chronic tinnitus

[7], and positron emission tomography (PET) and func- 31  
tional magnetic resonance imaging (fMRI) studies have 32  
shown greater activation of the auditory cortex, as well 33  
as non-auditory areas (frontal areas, limbic system and 34  
cerebellum) in tinnitus patients compared to controls [8]. 35  
Animal models of tinnitus point to neuronal alterations 36  
in the dorsal cochlear nucleus [9], affecting upstream au- 37  
ditory nuclei, with previous evidence of altered activity 38  
of the auditory cortex [10]. The auditory cortex has been 39  
shown to have significantly reduced functional connectiv- 40  
ity with limbic structures (such as the hippocampus and 41  
amygdala) when comparing regional fMRI low-frequency 42  
activity fluctuations in a mouse model of noise-induced tin- 43  
nitus [11]. Still, the involvement of limbic structures, such 44  
as the hippocampus, in noise-induced tinnitus remains 45

46 poorly investigated.

47 Auditory information reaches the hippocampus  
48 through two distinct pathways: the lemniscal and non-  
49 lemniscal pathways, which converge in the entorhinal  
50 cortex before reaching the hippocampus [12]. Processing  
51 of auditory input in the hippocampus can be measured  
52 by auditory event-related potentials (aERP) for sensory  
53 gating, which is defined as a reduction in aERP to a re-  
54 peated identical stimulus. Mouse aERP recordings are  
55 commonly performed on the CA1 and CA3 hippocampal  
56 regions [13, 14, 15]. Notably, the CA1 region maintains  
57 direct connections with the primary auditory cortex and  
58 auditory association areas [16]. This unique connectivity  
59 establishes the hippocampus as an important interface  
60 between the auditory and limbic systems, potentially im-  
61 pacted in neurological conditions such as tinnitus.

62 Auditory sensory gating can be assessed with paired-  
63 click stimuli (0.5 s apart) where the aERP magnitude in  
64 response to the second click generates a smaller amplitude  
65 compared to the first. In humans, aERPs are measured  
66 using electroencephalogram (EEG), while in mice aERPs  
67 are often recorded using intra-hippocampal chronically  
68 implanted electrodes [17, 13]. An incomplete suppression  
69 of the second click represents abnormal sensory process-  
70 ing, and poor “gating” of paired auditory stimuli [18]. A  
71 decrease in sensory gating measured by cortical aERPs in  
72 response to paired tones has been shown to be correlated  
73 with tinnitus severity in young adults [19], whereas an  
74 increased latency in aERP was found in tinnitus patients  
75 [20]. Still, the neuronal correlates of aERPs are poorly  
76 understood and animal models of noise-induced tinnitus  
77 measuring auditory gating are largely lacking even though  
78 the aERP waveform of rodents, described as positive (P)  
79 or negative (N) peaks, with approximate latency in mil-  
80 liseconds, P20, N40 and P80 [17] or P1, N1 and P2, are  
81 analogous to the human waveforms (P50, N100 and P200).

82 Pharmacologically it has been shown that certain  
83 nicotinic acetylcholine receptors take part in augment-  
84 ing aERPs [17, 13]. Furthermore, it was shown that  
85 smoking cigarettes containing different doses of cannabis  
86 led to a reduction in the amplitude of event-related po-  
87 tentials. Additionally, subjects experienced an acutely  
88 diminished attention and stimulus processing after smok-  
89 ing cannabis [21]. On the contrary, a combined activation  
90 of the cholinergic and the endocannabinoid system has  
91 shown to improve auditory deviant detection and mis-  
92 match negativity aERPs in human subjects, but not when  
93 each drug was delivered alone [22]. This indicates inter-  
94 actions between the two systems, however, the impact of  
95 nicotine and/or cannabis, on aERPs in animal models

of tinnitus, has to our knowledge not yet been studied. 96  
Here, we first hypothesized that noise-induced tinnitus 97  
interferes with auditory gating, and next that nicotine 98  
or natural extracts of cannabis could improve auditory 99  
pre-attentional processing in noise-induced tinnitus. To 100  
test this, we used a mouse model of noise-induced tinnitus 101  
without hearing impairment and measured aERPs in the 102  
dorsal hippocampus in response to paired clicks. 103

## 104 **Methods**

### 105 **Animals**

106 All protocols were approved by and followed the guide-  
107 lines of the ethical committee of the Federal University of  
108 Rio Grande do Norte, Brazil (Comit e de  tica no Uso de  
109 Animais - CEUA; protocol no.094.018/2018). C57BL/6J  
110 male mice (1 month old at the beginning of the exper-  
111 imental timeline) originated from an in house-breeding  
112 colony. Here we used a total of 29 mice, where 7 were  
113 excluded in the Gap-prepulse inhibition of acoustic startle  
114 (GPIAS) test initial screening due to poor GPIAS (see  
115 exclusion criteria at the GPIAS section), leading to a  
116 total of 22 mice reported in all experimental procedures.  
117 Before the beginning of experiments, the animals were  
118 randomly assigned using python scripts (see section 2.11)  
119 to the Sham (n = 11) or Noise-exposed (n = 11) group.  
120 From those, 3 animals were excluded from aERP record-  
121 ings due to low signal-to-noise ratio and 2 animals died  
122 after surgery (remaining 10 Sham and 7 Noise-exposed).  
123 Animals were housed on a 12/12h day/night cycle (on-  
124 set/offset at 6h/18h) at 23 C to maintain normal circa-  
125 dian rhythm and had free access to water and food pellets  
126 based on corn, wheat and soy (Nuvilab, Quimtia, Brazil;  
127 #100110007, Batch: 0030112110). All experiments were  
128 performed during the day cycle, ranging from 7h to 15h.  
129 Animals (2-4 per cage) were housed in IVC cages, and  
130 paper and a polypropylene tube was added as enrichment.  
131 Once implanted, animals were single-housed until the end  
132 of the experiment. Mice were tunnel handled for the ex-  
133 periments as it has been shown to impact stress during  
134 experimental procedures, while tail-handling was used for  
135 routine husbandry procedures.

### 136 **Sound calibration**

137 The sound equipment used for Auditory brainstem re-  
138 sponses (ABRs), noise exposure, GPIAS and aERPs was  
139 calibrated in their respective arenas, all inside a sound-  
140 shielded room with background noise of 35 decibel sound  
141 pressure level (dB SPL). We used an ultrasonic micro-

142 phone (4939-A-011, Brüel and Kjær) to record each of the  
143 stimuli used at 300 voltage steps logarithmically spaced  
144 in the 0-1V range, allowing to play all needed stimuli at  
145 the voltage necessary to achieve the needed intensity in  
146 dB SPL.

### 147 **Auditory brainstem responses**

148 The ABRs of mice was tested both before and after the  
149 noise exposure protocol. Mice were anesthetized with an  
150 intraperitoneal injection (10  $\mu$ l/gr) of a mixture of ke-  
151 tamine/xylazine (90/6 mg/kg) plus atropine (0.1 mg/kg)  
152 and placed in a stereotaxic apparatus on top of a thermal  
153 pad with a heater controller (Supertech Biological Tem-  
154 perature Controller, TMP-5b) set to 37°C and ear bars  
155 holding in front of and slightly above the ears, on the tem-  
156 poral bone, to not block the ear canals. The head of the  
157 animal was positioned 11 cm in front of a speaker (Super  
158 tweeter ST400 trio, Selenium Pro). To record the ABR  
159 signal, two chlorinated electrodes were used, one record-  
160 ing electrode and one reference (impedance 1 k $\Omega$ ) placed  
161 subdermally into small incisions in the skin covering the  
162 bregma region (reference) and lambda region (recording).  
163 Sound stimulus consisted of narrow-band uniform white  
164 noise pulses with length of 3 ms each, presented at 10  
165 Hz for 529 repetitions at each frequency and intensity  
166 tested. The frequency bands tested were: 8-10 kHz, 9-11  
167 kHz, 10-12 kHz, 12-14 kHz and 14-16 kHz. Pulses were  
168 presented at 80 dB SPL in decreasing steps of 5 dB SPL  
169 to the final intensity 45 dB SPL as previously described  
170 [23]. The experimenter was blinded to the animal group  
171 during the ABR recordings.

### 172 **Gap prepulse inhibition of acoustic startle**

173 The GPIAS test [24] is known to reliably measure tinnitus-  
174 like behavior on rodents such as rats, mice and guinea-pigs  
175 [25, 26, 27, 28], and was used here to infer tinnitus in noise-  
176 exposed mice. GPIAS evaluates the degree of inhibition  
177 of the auditory startle reflex by a short preceding silent  
178 gap embedded in a carrier background noise. Before the  
179 first recording session, the animals were habituated to  
180 the experimenter and experimental setup for 3 consec-  
181 utive days. Then, mice were acclimatized during the  
182 next 3 consecutive days by running the entire GPIAS  
183 session with all frequencies and trials but without the  
184 startle pulse. Animals were allowed 5 minutes inside the  
185 recording chamber before each recording session. Mice  
186 were then screened 3 days before the noise exposure for  
187 their ability to detect the gap. Animals were then tested  
188 again 3 days after noise exposure or sham procedures (no

189 noise), as previously described [23]. Animals were placed  
190 in custom-made acrylic cylinders perforated at regular  
191 intervals. The cylinders were placed in a sound-shielded  
192 custom-made cabinet (44 x 33 x 24 cm) with low-intensity  
193 LED lights in a sound-shielded room with  $\approx$ 35 dB SPL  
194 (Z-weighted) of background noise. A single loudspeaker  
195 (Super tweeter ST400 trio, Selenium Pro, freq. response  
196 4-18 kHz) was placed horizontally 4.5 cm in front of the  
197 cylinder, and startle responses were recorded using a dig-  
198 ital accelerometer (MMA8452Q, NXP Semiconductors,  
199 Netherlands) mounted to the base plate of the cylinder  
200 and connected to an Arduino Uno microcontroller, and  
201 a data acquisition cart (Open-ephys board) analog input.  
202 Sound stimuli consisted of 60 dB SPL narrow-band filtered  
203 white noise (carrier noise); 40 ms of a silent gap (Gap-  
204 Startle trials); 100 ms of interstimulus interval carrier  
205 noise; and 50 ms of the same noise at 105 dB SPL (startle  
206 pulse), with 0.2ms of rise and fall time. The duration of  
207 the carrier noise between each trial (inter-trial interval)  
208 was pseudo-randomized between 12-22 s. Test frequencies  
209 between 8-10, 9-11, 10-12, 12-14, 14-16 and 8-18 kHz were  
210 generated using a butterworth bandpass filter of 3rd order.  
211 The full session consisted of a total of 18 trials per fre-  
212 quency band tested (9 Startle and 9 GapStartle trials per  
213 frequency, pseudo-randomly played). It was previously  
214 shown that mice can suppress at least 30% of the startle  
215 response when the loud pulse is preceded by a silent gap  
216 in background noise [29], therefore we retested frequencies  
217 to which an animal did not suppress the startle by at least  
218 30% in a second session the next day. Animals that still  
219 failed to suppress the startle following the silent gap in at  
220 least two frequencies in the initial GPIAS screening were  
221 excluded from further experiments. The experimenter was  
222 blinded to the animal group during the GPIAS record-  
223 ings. Since we only assessed mice three days after noise  
224 exposure, while others suggest that chronic tinnitus arises  
225 after seven weeks in C57Bl6 mice [30], we infer our GPIAS  
226 relate to acute tinnitus.

### 227 **Noise exposure**

228 Mice were anesthetized with an intraperitoneal adminis-  
229 tration of ketamine/xylazine (90/6 mg/kg), placed inside  
230 an acrylic cylinder (4 x 8 cm) facing a speaker (4 cm  
231 distance) inside a sound-shielded cabinet (44 x 33 x 24  
232 cm) and exposed to a narrow-band white noise filtered  
233 (butterworth, -47.69dB SPL/Octave) from 9-11 kHz, at an  
234 intensity of 90 dB SPL for 1h. This protocol was previously  
235 shown to trigger a tinnitus-phenotype in C57BL/6 mice  
236 that could be decreased by chemogenetically modulating

237 the firing rate of CaMKII $\alpha$ + DCN units [23]. Next, mice  
238 remained in the cylinder inside the sound shielded cham-  
239 ber for 2 hours, due to the fact that sound-enrichment  
240 post loud noise exposure may prevent tinnitus induction  
241 [31]. Sham animals were treated equally, but without  
242 any sound stimulation. We used 11 noise-exposed and 11  
243 sham animals. The animals were then returned to their  
244 home cages.

## 245 Electrode array assembly

246 Tungsten insulated wires of 35  $\mu$ m diameter (impedance  
247 100-400 k $\Omega$ , California Wires Company) were used to man-  
248 ufacture 2 x 8 arrays of 16 tungsten wire electrodes. The  
249 wires were assembled to a 16-channel custom made printed  
250 circuit board and fitted with an Omnetics connector (NPD-  
251 18-VV-GS). Electrode wires were spaced by 200  $\mu$ m with  
252 increasing length distributed diagonally in order to record  
253 from different hippocampal layers, such that, after im-  
254 plantation, the shortest wire were at dorsoventral (DV)  
255 depth of -1.50 mm and the longest at DV -1.96 mm. The  
256 electrodes were dipped in fluorescent dye (1,1'-dioctadecyl-  
257 3,3,3',3'-tetramethylindocarbocyanine perchlorate; DiI,  
258 Invitrogen) for 10 min (for post hoc electrode position)  
259 before implanted into the right hemisphere hippocampus.

## 260 Electrode array implantation

261 22 animals were used for the electrodes implantation  
262 surgery. In detail, mice were anesthetized using a mixture  
263 of ketamine/xylazine (90/6 mg/kg) and placed in a stereo-  
264 taxic frame on top of a heat pad (37°C). Dexpanthenol  
265 was applied to cover the eyes to prevent ocular dryness.  
266 When necessary, a bolus of ketamine (45 mg/kg) was  
267 applied during surgery to maintain adequate anesthesia.  
268 Iodopovidone 10% was applied on the scalp to prevent  
269 infection, and 3% lidocaine hydrochloride was injected  
270 subdermally before an incision was made. In order to  
271 expose the cranial sutures, 3% hydrogen peroxide was ap-  
272 plied over the skull. Four small craniotomies were done in  
273 a square at coordinates mediolateral (ML) 1 mm and an-  
274 teroposterior (AP) -2.4 mm; ML: 1 mm and AP: -2.6 mm;  
275 ML: 2.45 mm and AP: -2.4 mm; ML: 2.45 mm and AP:  
276 -2.6 mm, to make a cranial window where the electrodes  
277 were slowly inserted at DV coordinate of -1.96 mm (for  
278 the longest shank). Four additional holes were drilled for  
279 the placement of anchoring screws, where the screw placed  
280 over the cerebellum served as reference. The electrode im-  
281 plant was fixed to the skull with polymethyl methacrylate  
282 moldable acrylic polymer around the anchor screws. After  
283 surgery, the animals were monitored until awake and then

284 housed individually and allowed to recover for one week  
285 before recordings. For analgesia, ibuprofen 0.04 mg/ml  
286 was administered in the water bottle 2 days before and 3  
287 days after the surgery. Subcutaneous Meloxicam 5 mg/kg  
288 was administered for 3 consecutive days after the surgery.  
289 2 animals died shortly after the surgery, remaining 10  
290 animals in the sham group and 7 in the noise-exposed  
291 group.

## 292 Paired-click stimuli for auditory event related 293 potentials

294 Mice were habituated during two days in the experimental  
295 setup and in the day of recording, anesthesia was briefly  
296 induced with isoflurane (5% for <1 min) to gently connect  
297 the implanted electrode array to a head-stage (Intan RHD  
298 2132) connected to an acquisition board (OpenEphys v2.2  
299 XEM6010-LX150) by a thin flexible wire. aERPs were  
300 recorded in freely moving animals placed in a low-light  
301 environment exposed to paired click stimulus, played by  
302 a speaker (Selenium Trio ST400) located 40 cm above  
303 the test area. All recordings were performed in standard  
304 polycarbonate cage bottom, which was placed inside a  
305 sound-shielded box (40 x 45 x 40 cm). The paired clicks  
306 consisted of white noise filtered at 5-15 kHz presented  
307 at 85 dB SPL, 10 ms of duration with 0.2 ms rise/fall  
308 ramp, and 0.5 s interstimulus interval. Stimulus pairs  
309 were separated by 2-8 s (pseudorandomly), and a total of  
310 50 paired stimuli were presented. The session duration  
311 varied from 148 s to 442 s.

312 To investigate aERPs, average data from different  
313 animals, and also, compare responses from different ex-  
314 perimental days and different pharmacological treatments,  
315 the appropriate hippocampal location for picking up aERP  
316 was identified. As local field potentials are related to cell  
317 density, and thereby the resistivity of the tissue, it is useful  
318 to record from the hippocampus with its distinct layered  
319 structure that shows phase-reversals of local field poten-  
320 tials [32]. Responses to paired clicks were recorded one  
321 week after surgery. The grand average of aERP (average  
322 of 50 clicks) for each channel was plotted and the changed  
323 signal polarity across hippocampal layers was identified, as  
324 the electrode array channels were distributed at different  
325 depths. To facilitate comparison of aERP between im-  
326 planted animals we selected the first channel above phase  
327 reversal that showed a clear negative peak followed by a  
328 positive peak in the deeper channel. The visualization of  
329 the phase reversal channel was routinely added to analysis  
330 as channels sometimes shifted in the same animal, likely  
331 due to small movements in the electrode array when con-

necting/disconnecting mice to/from the headstage during  
different recording sessions. The experimenter was blind  
to the animal group during the aERP recordings.

### **Cannabis sativa extract production and analysis**

$\Delta^9$ -tetrahydrocannabinol (THC) is the main psychoactive compound in cannabis and it is known to be partial agonist of cannabinoid receptor types 1 and 2 (CB1 and CB2) [33], while cannabidiol (CBD) activates CB1 and CB2 receptors with more affinity over the latter and cannabidiol (CBD) acts as a negative allosteric modulator of CB1 [33]. The Cannabis sativa extract was produced from an ethanolic extraction with the flowers previously dried and crushed. After leaving them in contact with the solvent for 5 min in an ultrasonic bath, filtration was performed and the process was repeated twice. Additionally, the solvent was evaporated and recovered, leaving only the cannabis extract in resin form. Decarboxylation of the acidic components, mainly tetrahydrocannabinolic acid into THC, was carried out by heating the material at 90°C until the conversion to the neutral forms had been completed. The cannabis extract was analyzed by high-performance liquid chromatography (HPLC). Analytical standards of THC (Cerilliant T-005), cannabidiol (Cerilliant C-046) and CBD (Cerilliant C-045) were used in the calibration curve dilutions. An Agilent 1260 LC system (Agilent Technologies, Mississauga, ON, Canada) was used for the chromatographic analysis. A Poroshell 120 EC-C18 column (50 mm × 3.0 mm, 2.7 μm, Agilent Technologies) was employed, with a mobile phase at a flow rate of 0.5 mL/min and temperature at 50°C (separation and detection). The compositions were (A) water and (B) methanol. 0.1% formic acid was added to both water and methanol. The total analysis time was 18 min with the following gradient: 0–10 min, 60–85%B; 10–11 min, 85–100%B; 11–12 min, 100%; 12–17 min, 100–60%; 17–18 min, 60% the temperature was maintained at 50°C (separation and detection). The injection volume was 5 μL and the components were quantified based on peak areas at 230 nm. During the experiments we used a single dose of cannabis extract for each animal (100 mg/kg), containing 47.25 mg/kg of THC; 0.43 mg/kg of CBD and 1.17 mg/kg of CBN as analyzed by HPLC, and kindly donated by the Queiroz lab, Brain Institute, Federal University of Rio Grande do Norte, Brazil.

### **Pharmacology**

To activate the cholinergic system, and specifically brain nicotinic acetylcholine receptors, animals received a single intraperitoneal injection of nicotine (Sigma N3876) at 1.0 mg/kg [34] or saline (randomized order, 2 days in between session 1 and 2) 5 minutes before aERP recordings. In comparison to nicotine, which has a half-life of approximately 6–7 minutes in mouse plasma [35], THC, CBD, and CBN have longer half-lives. Specifically, THC has a half-life of approximately 110 minutes in mouse plasma [36], CBD has a half-life of 3.9 hours in mouse plasma [37], and CBN has a half-life of 32 hours in human plasma [38]. Here we administered a single dose of cannabis extract (100 mg/kg) and recorded responses after 30 minutes, similar to previously reported [39, 40, 41]. On the experimental day, the cannabis extract resin was diluted in corn oil to 10 mg/ml solution by mixing the extract and the oil and then sonicating for 5 min before injected intraperitoneally (at volume of 10 μl/g body weight) 30 min prior to aERP recording sessions to reach max plasma concentration of THC [36]. After the third recording session, an additional dose of nicotine (1 mg/kg) was injected (to study potentially synergistic effects of cannabis extract + nicotine) and the animals were recorded 5 min later to observe how the interaction of the cholinergic and endocannabinoid system affects aERPs. After each aERP recording session, mice were unconnected from the headstage and returned to their home cage.

### **Histology**

To verify expected electrode positioning, animals were deeply anesthetized at the end of the experimental timeline with a mixture of ketamine/xylazine (180/12 mg/kg) and transcardiac perfused with cold phosphate buffered saline (PBS) followed by 4% paraformaldehyde (PFA). Brains were dissected and placed in 4% PFA for 48h. Next, brains were sliced using a free-floating vibratome (Leica VT1000S) at 75 μm thickness, and cell nuclei were stained with 4',6-diamidino-2-Phenylindole (DAPI, Sigma) to visualize cell layers and borders of the hippocampus. In addition to DiI-staining the electrodes, a current pulse of 500 μA was routinely passed through the deepest electrode for 5 s at the end the last aERP recordings to cause a small lesion around the electrode tip to confirm electrode depth. Images were visualized using a Zeiss imager A2 fluorescence microscope with a N-Achroplan 5x objective.

## 422 Data Analysis

423 Analysis of auditory brainstem responses was done as  
424 previously described [23] and consisted of averaging the  
425 529 trials, filter the signal using a 3rd order butterworth  
426 bandpass filter from 600-1500 Hz, and slice the data 12  
427 ms after the sound pulse onset. Thresholds were defined  
428 by automatically detecting the lowest intensity that can  
429 elicit a wave peak one standard deviation above the mean,  
430 and preceded by a peak in the previous intensity [23]. Ef-  
431 fect of noise exposure and frequency of stimulus on ABR  
432 thresholds was evaluated using the Friedman Test, and  
433 pairwise comparisons were performed using the Wilcoxon  
434 signed-rank test. Effect of group was evaluated using the  
435 Kruskal-Wallis test, and pairwise comparisons were per-  
436 formed using the Mann-Whitney U test. Effect of group  
437 and frequency of stimulus on ABR threshold differences  
438 before and after exposure was evaluated using two-way  
439 analysis of variance (ANOVA). When multiple compar-  
440 isons within the same dataset were performed, p values  
441 were Bonferroni-corrected accordingly.

442 For each frequency tested in GPIAS, Startle and Gap-  
443 Starle trials responses were separated and the signal was  
444 filtered with a Butterworth lowpass filter at 100 Hz. The  
445 absolute values of the accelerometer axes, from the ac-  
446 celerometer fitted below the cylinders enclosing the mice  
447 during the modified acoustic startle test, were averaged  
448 and sliced 400 ms around the startle pulse (200 ms before  
449 and 200 ms after). The root-mean-square (RMS) of the  
450 sliced signal before the Startle (baseline) was subtracted  
451 from the RMS after the startle response (for both Startle  
452 only and GapStartle sessions). The GPIAS index for each  
453 frequency was then calculated as

$$\left(1 - \left(\frac{GapStartleRMS}{StartleRMS}\right)\right) * 100$$

454 generating percentage of suppression of startle. For each  
455 animal, the most affected frequency was determined as  
456 the frequency with the greatest difference in GPIAS index  
457 before and after noise exposure. This was done as mice  
458 did not show decreased GPIAS at the same narrow-band  
459 frequency despite being subjected to the same noise expo-  
460 sure, indicating individual differences in possible tinnitus  
461 perception [26]. The definition of the most affected fre-  
462 quency followed the same procedure for both sham and  
463 noise-exposed animals. The effects of group (sham or  
464 noise-exposed), epoch (before or after exposure) and fre-  
465 quency of stimulus were tested using 3-way mixed models  
466 ANOVA. The effect of the group and epoch on the GPIAS  
467 index of the most affected frequency was evaluated using  
468 the Kruskal-Wallis and the Friedman test, respectively;

and pairwise comparisons were done using the Mann- 469  
Whitney U and Wilcoxon signed-rank test, respectively. 470

Auditory event-related potentials in response to paired- 471  
clicks were filtered using a low pass filter at 60 Hz, sliced 472  
0.2 s before and 1 s after the first sound click onset, and 473  
all 50 trials were averaged. To compare signals between 474  
different animals ( $n = 10$  sham and  $n = 7$  noise-exposed) 475  
and different treatments we always analyzed the channel 476  
above hippocampal phase reversal with a negative peak 477  
around 40 ms (N40) and a positive peak around 80 ms 478  
latency (P80). aERP components were quantified by peak 479  
amplitude (baseline-to-peak) after stimulus onset. The 480  
N40 was considered as the maximum negative deflection 481  
between 20 and 50 ms after the click stimulus, and P80 as 482  
the maximum positive deflection after the N40 peak. The 483  
baseline was determined by averaging all 50 trials and 484  
then averaging the 200 ms of prestimulus activity (before 485  
the first click). The latency of a component was defined 486  
as the time of occurrence of the peak after stimulus onset. 487  
The ratio in percentage of the first and second click am- 488  
plitude (the suppression of the second click, e.g. sensory 489  
filtering) was calculated as 490

$$\left(1 - \left(\frac{SecondClickAmplitude - Baseline}{FirstClickAmplitude - Baseline}\right)\right) * 100$$

and error bars represent standard error of the mean (s.e.m) 491  
for all figures. A gating improvement was considered when 492  
the aERP peak amplitude suppression ratio(s) increased 493  
compared to sham (when comparing between groups) or 494  
to saline (when comparing between treatments). Effect 495  
of group, treatment and click on amplitude and latency 496  
of aERP components were evaluated using 3-way mixed- 497  
models ANOVA; effect of group and treatment in aERP 498  
components suppression, delay and N40-P80 width were 499  
evaluated using 2-way mixed-models ANOVA; and Stu- 500  
dent's t-test was used for pairwise comparisons. Whenever 501  
the response failed to comply with normality, homoscedas- 502  
ticity and independence assumptions and parametric fit- 503  
ting was inadequate, the Kruskal-Wallis test was used to 504  
evaluate the effect of group, and the Mann-Whitney U test 505  
was used for pairwise comparisons; and the Friedman test 506  
was used to evaluate the effect of treatment and click, and 507  
Wilcoxon signed-rank test was used for pairwise compar- 508  
isons. Statistical power for the tests ranged from 78.5 to 509  
92.2%, and post-hoc multiple comparisons were adjusted 510  
by Bonferroni correction. Differences in occurrence of 511  
double-peak responses were evaluated using McNemar's 512  
test. 513

## 514 Results

515 In order to investigate whether noise-exposure can affect  
516 auditory gating we established an experimental timeline  
517 for experiments evaluating auditory perception using three  
518 different tests in mice exposed to a mild noise (90 dB-  
519 SPL, 9-11 kHz, 1h): ABRs, GPIAS and aERPs. Hearing  
520 thresholds of mice were assessed using ABRs 2 days be-  
521 fore (baseline) and 2 days after sham or noise exposure  
522 (Figure 1A). ABRs showed field potentials with distinct  
523 peaks indicating neuronal activity at the auditory nerve,  
524 cochlear nuclei, superior olivary complex, and inferior  
525 colliculus [42] in response to sound clicks presented at dif-  
526 ferent frequencies (Figure 1B-C). Similar to sham, noise  
527 exposure did not cause any change in ABR hearing thresh-  
528 olds at all frequencies tested when compared to baseline  
529 (Group, Kruskal-Wallis eff. size = 4.1e-05,  $p = 0.923$ ;  
530 Epoch, Friedman eff. size = 0.058,  $p = 0.08$ ; Frequency,  
531 Friedman eff. size = 0.007,  $p = 0.164$ ; Figure 1D). When  
532 plotting threshold shifts, we confirmed that noise-exposed  
533 animals were impacted to a similar degree than sham mice  
534 (ANOVA; Group,  $F(1,21) = 0.047$ ,  $p = 0.83$ ; Frequency,  
535  $F(4,84) = 0.2$ ,  $p = 0.938$ ; Group:Frequency,  $F(4,84) =$   
536  $2.021$ ,  $p = 0.09$ ; Figure 1E). Unlike other models of tinnit-  
537 us [43], we did not detect any effect of noise exposure in  
538 ABR Wave 1 amplitude (Epoch, Friedman test, eff. size  
539 = 0.037,  $p = 0.118$ ; Group, Kruskal-Wallis test, eff. size  
540 = 0.0002,  $p = 0.821$ ) or Wave 5 latency (Epoch, Friedman  
541 eff. size = 0.002,  $p = 0.55$ ; Group, Kruskal-Wallis eff.size  
542 = 0.014,  $p = 0.073$ , Supplemental Figure S1). These  
543 findings confirm that the noise exposure did not cause  
544 any detectable change in hearing thresholds, and suggest  
545 a negligible impact on cochlear synaptopathy.

546 Three days before and 3 days after noise exposure  
547 mice were tested for GPIAS (Figure 2A-C). No effect of  
548 group (sham or noise-exposed), epoch (before or after  
549 noise exposure procedure) or frequency of stimulus was  
550 found in GPIAS when evaluating all frequencies from ev-  
551 ery animal (the closest to significance being the stimulus  
552 frequency factor;  $F(5,65) = 1.419$ ,  $p = 0.229$ ; Figure 2D-E)  
553 and no pairwise differences between any group, epoch or  
554 frequency, possibly due to each individual mouse may ex-  
555 perience a different tinnitus pitch. We therefore evaluated  
556 the background frequency that interferes most with gap  
557 prepulse startle suppression for each individual mouse,  
558 which would correspond to the most likely tinnitus pitch  
559 of these animals (Figure 2F-G). Sham exposure had no ef-  
560 fect on GPIAS (Friedman test; eff.size = 0.075;  $p = 0.365$ ;  
561 Figure 2F, left), while in noise-exposed mice the noise ex-  
562 posure had a significant effect in GPIAS index (Friedman

test; eff. size = 1.0;  $p = 1.8e-03$ ), showing a decrease in  
startle suppression when comparing before and after noise  
exposure (Wilcoxon signed-rank test,  $p=9.8e-04$ ; Figure  
2F, right). Accordingly, the group (sham vs noise-exposed)  
had a significant effect on GPIAS measured after noise  
exposure (Kruskal-Wallis; eff. size = 0.663,  $p = 3.2e-04$ ),  
with noise-exposed mice showing lower GPIAS suppression  
than sham mice (Mann-Whitney U; eff. size = 0.805;  $p =$   
4.0e-05); but not before noise exposure (Kruskal-Wallis;  
eff. size = 0.117,  $p = 0.066$ ). GPIAS showed individual  
variability in the most affected frequency (Figure 2G),  
consistent with previous reports [26] and confirms that  
tinnitus interferes with the ability to suppress the startle  
response in noise-exposed animals.

After the ABR and GPIAS tests, electrodes were im-  
planted in the dorsal hippocampus for the assessment of  
sensory gating (Figure 3A). As expected, auditory event-  
related potential recordings showed that the second click  
consistently generated a smaller aERP (Figure 3B) and  
the magnitude of peaks around 40ms and 80ms were quan-  
tified from baseline as the N40 and P80 peak, respectively,  
for both the first and second click in the phase-reversal  
channel (see Methods, Figure 3B-C). Next, to investigate  
the impact of noise-induced tinnitus on auditory gating  
(11 days after noise-exposure), freely exploring mice were  
individually subjected to randomized paired-click stimuli  
where both sham and noise-exposed mice presented char-  
acteristic aERP (Figure 3D). Two types of measurements  
were evaluated: the responses to sound clicks measured  
in the hippocampus (amplitude in  $\mu V$  and latency in ms),  
which is a measurement of sound processing in the lim-  
bic system; and the ratio between the second and the  
first click responses (both amplitude and latency unitless),  
which measures the sensory gating.

As attention is modulated by the cholinergic system  
[44] and also the endocannabinoid system [45], we tested  
the impact of two agonists to both systems (nicotine and  
cannabis extract, individually or in combination) in mod-  
ulation of aERPs in our model of noise-induced tinnitus  
(Figure 4A). Animals were given a single injection of nico-  
tine (1 mg/kg) or saline before aERP recordings on the  
first two sessions. During the third session, the remaining  
two aERP recordings were conducted, with the initial  
recording taking place 30 minutes after the administra-  
tion of cannabis extract (100 mg/kg). Subsequently, an  
additional dose of nicotine (1 mg/kg) was injected to in-  
vestigate the potential synergistic effects of combining  
cannabis extract with nicotine. The average of the N40  
response in sham-exposed animals showed the second click  
to be consistently smaller in amplitude compared to the

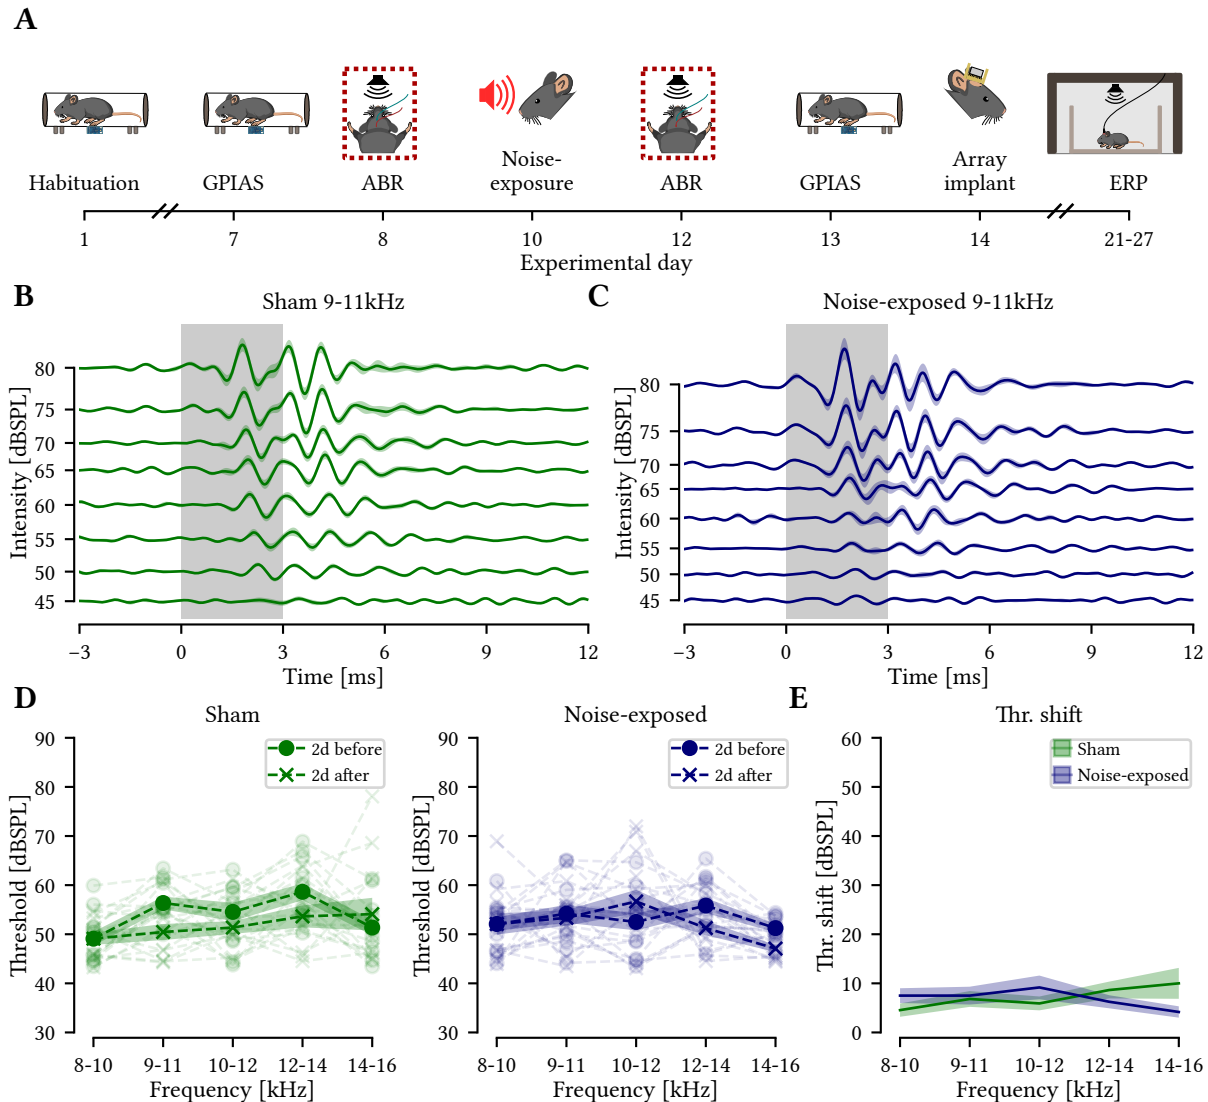

**Figure 1:** Noise exposure did not cause hearing threshold shift. A) Full experimental timeline highlighting time of ABR recordings (dotted rectangle). B-C) Mean auditory brainstem response (ABR) to 9-11kHz after noise-exposure for intensities 45-80 dB SPL for all 529 trials of all sham mice (B) and noise-exposed animals (C). Shaded traces show SEM, gray square indicates the sound pulse duration. D) Mean+SEM (line and shade) displaying auditory thresholds quantified for sham ( $n = 11$ , left) and noise-exposed ( $n = 11$ , right) animals two days before and two days after noise exposure, showing no significant difference at any frequency tested (Wilcoxon signed-rank test,  $p > 0.05$  for all frequencies in both groups). E) Mean+SEM (line and shade) threshold shift for sham and noise-exposed mice showing no significant difference between groups at any frequency (Student's t-test,  $p > 0.05$  for all frequencies).

613 first click ( $F(1,10) = 29.9$ ,  $p = 2.7e-04$ ; Supplemental  
 614 Figure S2A, left). This significant attenuation on the  
 615 second click was also observed for noise-exposed ( $F(1,10)$   
 616  $= 11.2$ ,  $p = 7e-03$ ; Supplemental Figure S2A, right). The  
 617 second click attenuation differed in strength depending on  
 618 the pharmacological treatment between sham and noise-  
 619 exposed mice ( $F(3,60) = 3.67$ ,  $p = 1.7e-02$ ; Supplemental  
 620 Figure S2A). For noise-exposed animals the second click  
 621 response was decreased compared to the first in nicotine  
 622 ( $p = 1.6e-02$ ) and cannabis extract + nicotine ( $p = 1.6e-$   
 623  $02$ ) treatment but not in saline ( $p = 0.237$ ) or cannabis  
 624 extract alone ( $p = 0.216$ ; Supplemental Figure S2A,

right), in contrast to sham animals. We thereby found  
 a significant interaction between treatment and animal  
 condition (sham or noise-exposed) on the N40 suppres-  
 sion ratio ( $F(3,60) = 3.5$ ,  $p = 2e-02$ , Figure 4B). Looking  
 specifically at sham mice, no significant difference was  
 found in the N40 aERP ratio between treatments, while  
 for noise-exposed animals, pairwise comparisons showed  
 an increased N40 amplitude ratio after administration of  
 cannabis extract + nicotine compared to cannabis extract  
 alone ( $p = 1.9e-02$ ), nicotine alone ( $p = 3.2e-02$ ) and NaCl  
 treatment ( $p = 1.9e-02$ , Figure 4B). There was also a sig-  
 nificant difference in N40 ratio under cannabis extract +



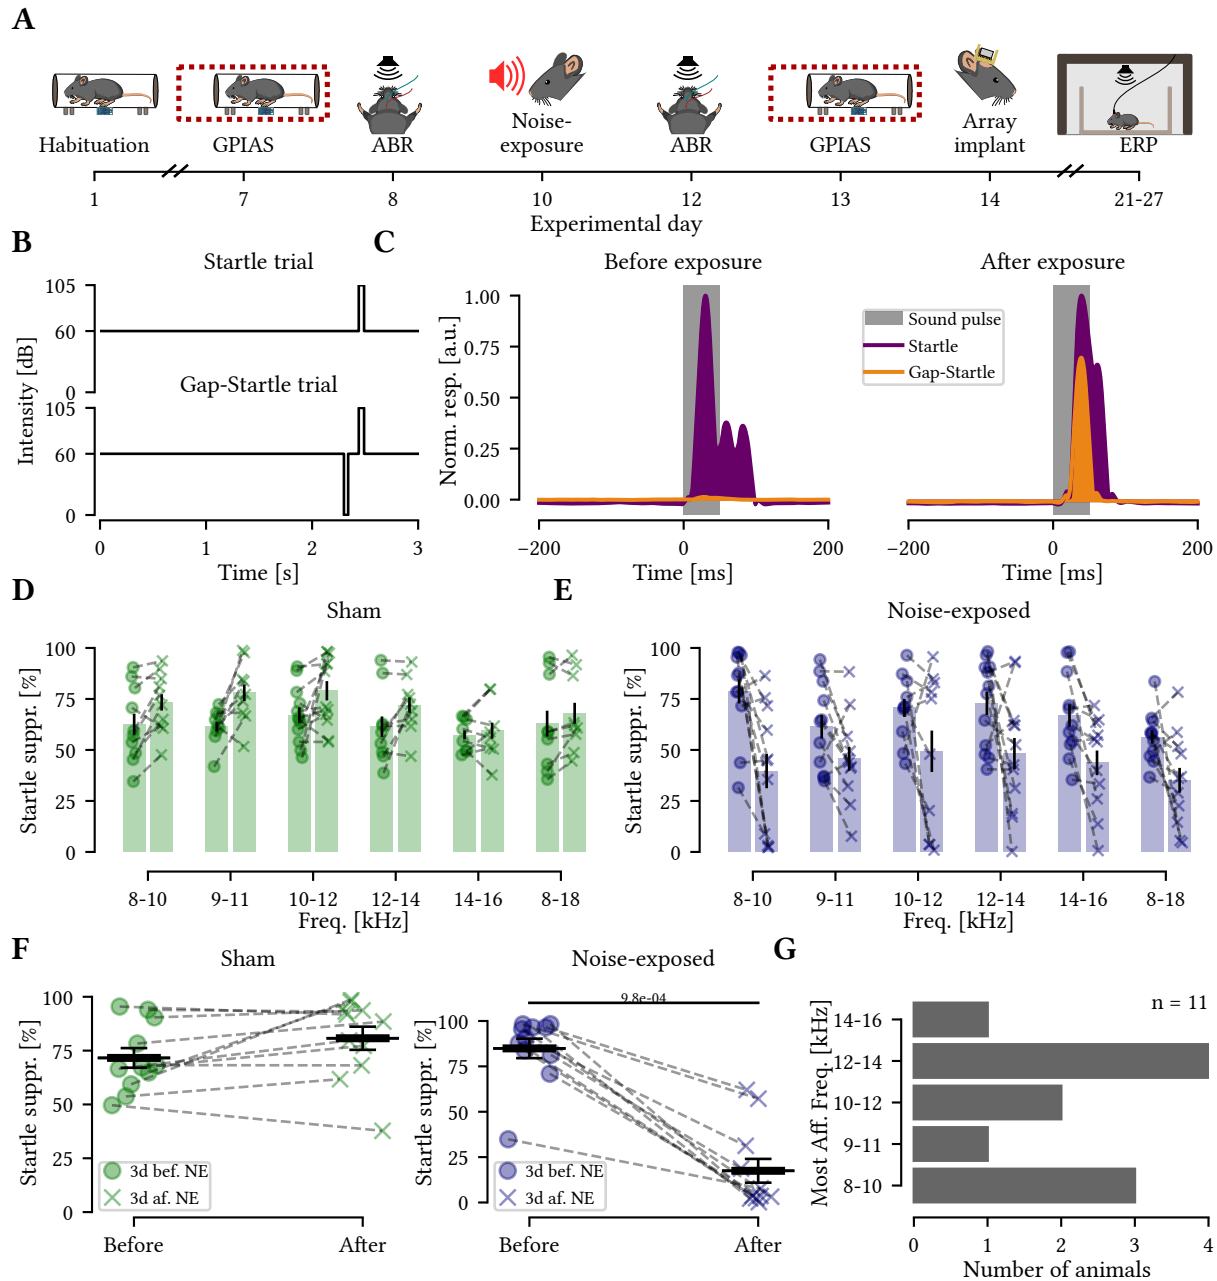

**Figure 2:** Noise-exposed animals showed decreased startle suppression. A) Timeline of experiments highlighting time point of the GPIAS tests. B) Schematic GPIAS protocol. C) Representative examples of startle suppression by the gap (left) and negative startle suppression (right) from the same animal 3 days before and 3 days after noise exposure, respectively. Filled traces represent an average of 9 trials of stimulus without gap (purple) and with gap (orange). Gray rectangle represents the 50ms startle stimulus. D-E) GPIAS index for all frequencies tested 3 days before (o) and 3 days after (x) noise exposure for sham (D) and noise-exposed (E) mice. F) The frequency with largest difference in startle suppression before and after noise-exposure was used for quantification of group GPIAS performance. Sham animals show no difference in GPIAS performance before and after noise exposure (left, n=11), while noise-exposed mice (right) show a significant decrease in startle suppression by the silent gap (Wilcoxon signed-rank test, n = 11, p = 9.8e-04). G) The frequency with largest difference in startle suppression before and after noise-exposure varied between individual noise-exposed mice.

637 nicotine treatment between sham and noise-exposed mice  
 638 (p = 1.0e-02; Figure 4B). We found a general effect of  
 639 group in the N40 amplitude, where noise-exposed animals  
 640 consistently showed a greater average when compared to  
 641 sham-exposed mice (F(1,20) = 7.467; p = 6.3e-03; Figure

4C, Supplemental Table S1). Taken together, these results  
 indicate that nicotine has a more pronounced effect on  
 the filtering of repetitive stimuli in noise-exposed animals  
 compared to sham animals, and that the combination of  
 nicotine + cannabis extract strongly enhances the first

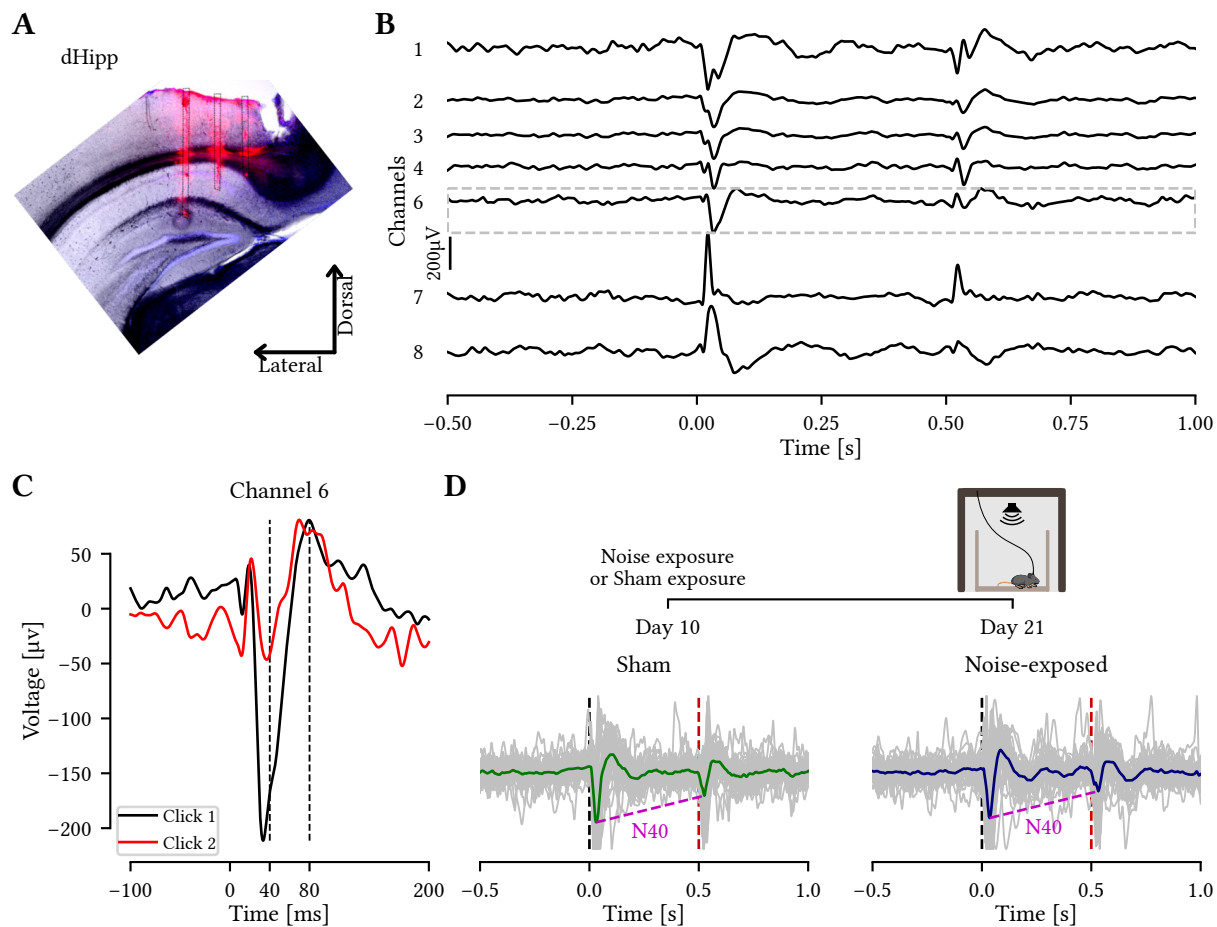

**Figure 3:** Auditory event-related potentials in sham and noise-exposed mice. A) Left, image of a mouse implanted with an electrode array. Right, coronal slice showing the dorsal hippocampus with electrode tracts stained with DII in the CA1 region. B) Average aERPs in response to paired clicks from 8 channels at different depths from a recording session from a single animal. The channel above phase reversal (gray dotted box) was consistently used for aERP quantification. C) The reversal channel from ‘B’ at a greater magnification with click 1 (black) and 2 (red) responses superimposed. Dashed lines indicating positive and negative peaks at different characteristic latencies (N40 and P80 components). D) Top, simplified experimental timeline. Bottom, average traces of click responses in saline condition for sham (green, n = 10) and noise-exposed animals (blue, n = 7). Superimposed gray traces are the average response of 50 trials from each individual animal, dashed lines indicate the sound stimuli onset and amplitude difference of N40 peaks.

647 and second click ratio in noise-exposed animals, an effect  
648 not seen in sham animals.

649 Examining latency of the N40 component showed no  
650 differences in pairwise comparisons between clicks after  
651 any particular treatment ( $p > 0.05$ ; Supplemental Figure  
652 S2B) although the distribution of latencies showed the  
653 second N40 latency to be consistently shorter compared  
654 to the first ( $p = 2.6e-03$ , Friedman test). Comparing  
655 the ratio of the first and second click latency revealed an  
656 increased response-delay in noise-exposed animals under  
657 cannabis treatment compared to sham animals in the  
658 same treatment ( $p = 3.0e-03$ ) and compared to noise-  
659 exposed mice after nicotine administration ( $p = 3.2e-02$ ;  
660 Figure 4D). This shows that cannabis delays the N40  
661 latency compared to nicotine in noise-exposed animals  
662 but not in sham animals (Figure 4D). Overall, an effect

of group on latency was found, where latency was consis-  
663 tently increased for noise-exposed mice ( $p = 4.3e-02$ ,  
664 Kruskal-Wallis test; Figure 4E, Supplemental Table S2).  
665

The P80 component of auditory aERP has been impli-  
666 cated in the NMDA dysfunction theory in schizophrenia,  
667 as ketamine can alter the P80 amplitude of mice [46].  
668 The P80 component in response to the second click was  
669 consistently smaller compared to the response to the first  
670 stimulus ( $F(1,20) = 6.156$ ,  $p = 2.2e-02$ ). Also, the latency  
671 for the peak was reduced by the repetition of stimuli  
672 for both groups and all treatments ( $F(1,20) = 9.79$ ,  $p =$   
673  $5.2e-03$ ). However, pairwise comparisons did not show  
674 any statistical differences for the P80 baseline to peak  
675 amplitude or latency (Figure 5A; Supplemental Figure  
676 S3) nor in ratios between the two clicks for the P80 ampli-  
677 tude (Figure 5B) and latency (Figure 5C). This indicates  
678

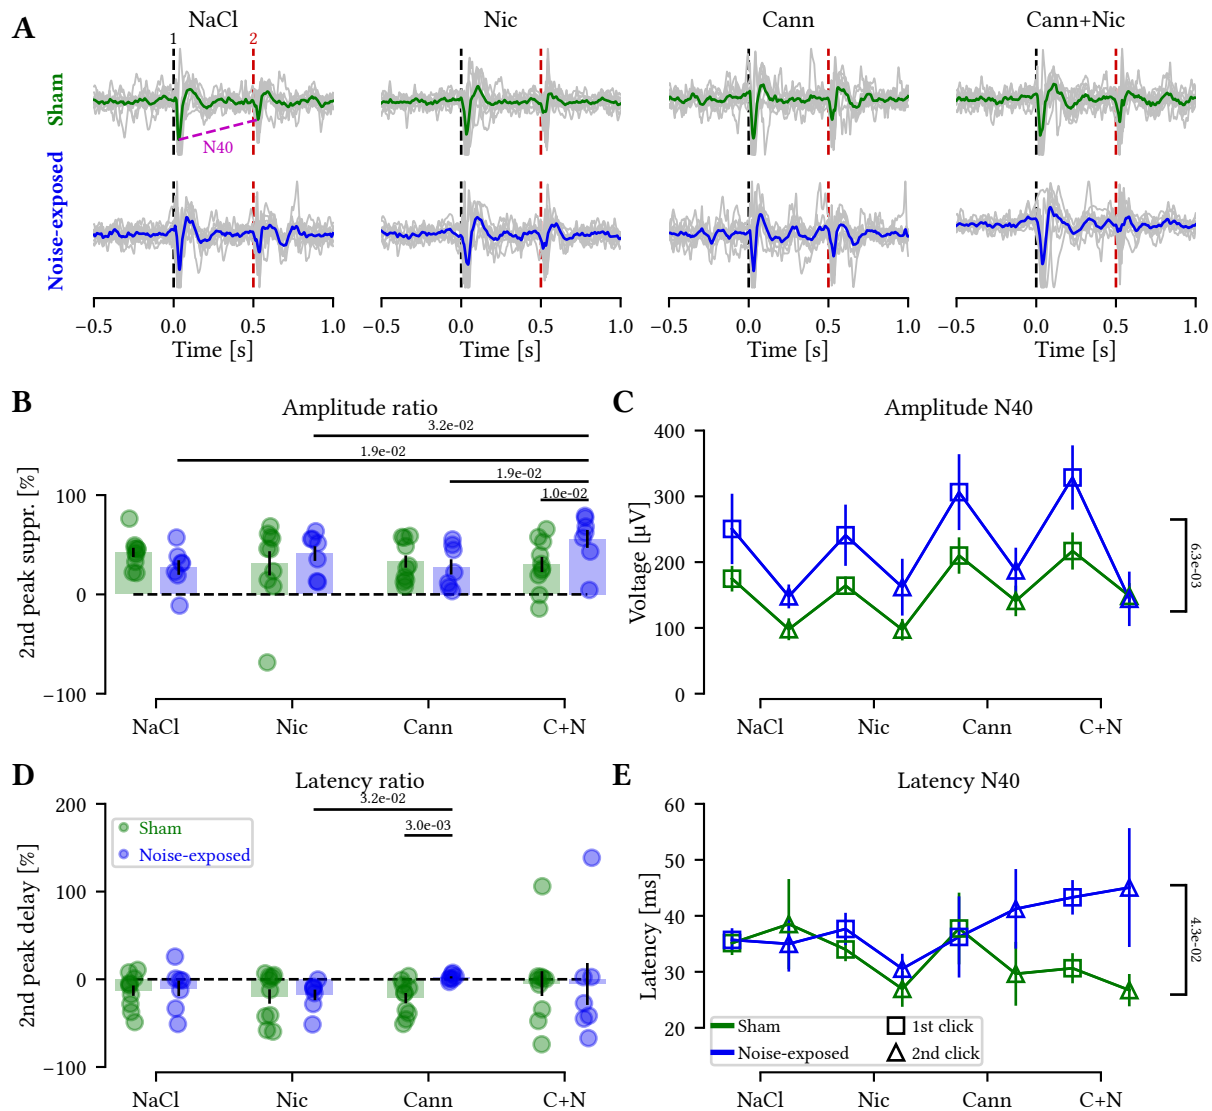

**Figure 4:** Noise-exposed mice have improved auditory gating under cannabis+nicotine treatment and showed overall larger and slower ERP responses. A) Auditory ERP recorded in awake mice in response to saline, nicotine, cannabis and cannabis+nicotine show characteristic suppression of the second click in both sham (top) and noise-exposed (bottom) animals. Gray trace shows the average aERP per animal while the green and blue traces show the group average for each treatment. B) Percentage of suppression of the second click of the N40 component (supplementary Figure S2) for sham (green) and noise-exposed (blue) mice, showing largest suppression of the second peak in noise-exposed mice following cannabis+nicotine administration (Student's t-test). C) N40 amplitude is consistently increased for noise-exposed ( $n = 7$ ) compared to sham animals ( $n = 10$ ). D) Percentage of the second N40 peak delay for both groups at each treatment showed cannabis extract to increase delay in noise-exposed mice compared to sham (Mann-Whitney U test), as well as compared to nicotine treatment of noise-exposed mice (Wilcoxon signed-rank test). E) N40 latency is consistently increased for noise-exposed ( $n = 7$ ) compared to sham animals ( $n = 10$ ).

679 that the P80 component is not affected by noise-induced  
680 tinnitus.

681 As previous studies suggested that the improvement  
682 of sensory gating by pharmacological agents is mediated  
683 by an enhancement of the first click rather than by the  
684 suppression of the second click [17, 13], we separated the  
685 analysis of aERPs to focus on each click response (first;  
686 click 1 and repeated; click 2) by comparing the amplitude  
687 and latency of the N40 or P80 components between differ-  
688 ent treatments (Figure 6; Supplemental Figure S4). First,

689 we found that sham animals increased the response to  
690 the first click after cannabis extract + nicotine treatment  
691 compared to just nicotine administration ( $p = 4e-03$ ; Fig-  
692 ure 6A, top left). Next, examining the repeated click 2  
693 response, showed that the cannabis extract increased the  
694 N40 click 2 response amplitude compared to nicotine ( $p$   
695  $= 2.7e-02$ ) and cannabis extract + nicotine also increased  
696 the N40 click 2 amplitude compared to nicotine alone ( $p$   
697  $= 6e-03$ ; Figure 6A, top right). For the noise-exposed  
698 group, the combination of cannabis extract + nicotine in-

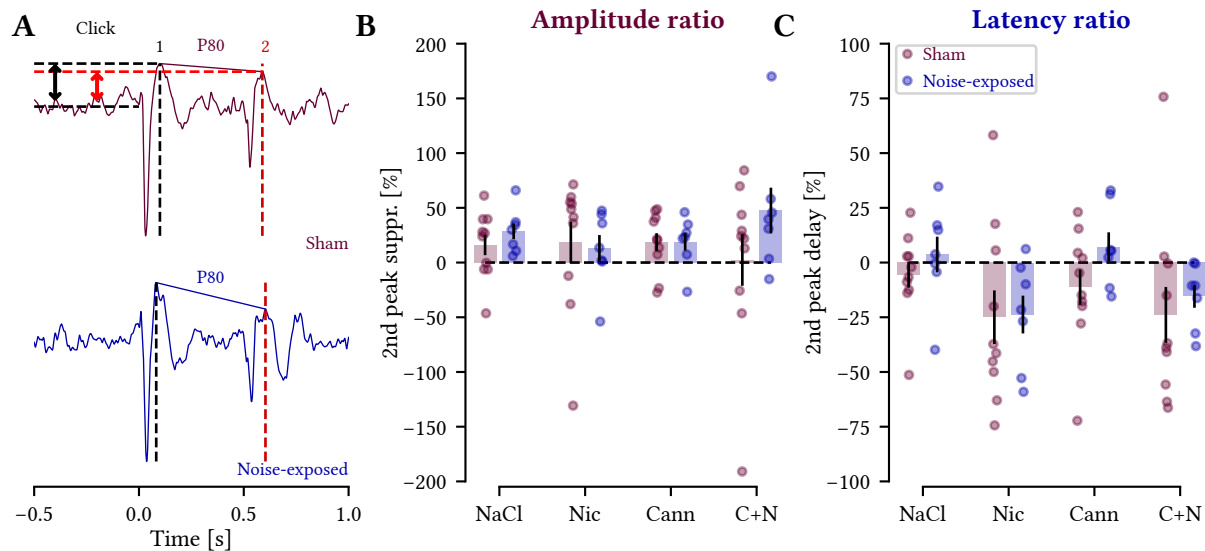

**Figure 5:** The P80 aERP amplitude and latency was not affected by noise-exposure or by nicotine and/or cannabis extract treatment. A) Representative trace highlighting the P80 component (vertical black and red dashed lines for first and second clicks, respectively). Arrows represent the calculated amplitude for each P80 response for the top trace. B) The percentage of second peak amplitude suppression showed no difference between sham and noise-exposed mice. C) Second P80 peak delay (ratio of the 1st and 2nd click responses latencies) for sham (purple) and noise-exposed (blue) animals showed no difference between groups or treatments. A negative 'delay' refers to a peak advancement. Wilcoxon signed-rank test,  $n = 10$  sham and 7 noise-exposed mice,  $p > 0.05$  for all comparisons.

699 creased click 1 amplitude compared to NaCl ( $p = 1.2e-02$ ;  
 700 Figure 6A, bottom left). There was no increase in click 1  
 701 response by nicotine, but still nicotine had an effect in the  
 702 combination of cannabis extract since the combination  
 703 of the two increased the response amplitude significantly  
 704 compared to cannabis extract alone ( $p = 4.7e-02$ ; Fig-  
 705 ure 6A, bottom left). The second click was unaltered by  
 706 nicotine and/or cannabis extract for noise-exposed mice  
 707 (Figure 6A, bottom right). Examining the latency of the  
 708 N40 response to the first click showed no alteration by  
 709 either treatment in the sham group (Figure 6B, top left).  
 710 For the repeated click 2 latency, the sham group instead  
 711 showed decreased latency in the presence of cannabis ex-  
 712 tract compared to NaCl treatment ( $p = 1.4e-02$ ; Figure  
 713 6B, top right). For the noise-exposed group, cannabis  
 714 extract + nicotine significantly delayed the click 1 N40  
 715 response compared to NaCl ( $p = 3.1e-02$ ; Figure 6B, bot-  
 716 tom left). Again, the latency of the second click N40  
 717 response was not affected by nicotine and/or cannabis  
 718 extract in noise-exposed mice (Figure 6B, bottom right).  
 719 Next, examining the P80 amplitude and latency in detail  
 720 only showed one effect on the second click latency for  
 721 noise-exposed mice where cannabis extract + nicotine  
 722 marginally increased the latency of P80 click 2 response  
 723 compared to nicotine alone ( $p = 4.9e-02$ ; Supplemental  
 724 Figure S4). All together we found the repeated second  
 725 click N40 response to not be consistently modulated by  
 726 treatment in noise-exposed mice, thereby agreeing with

previous literature that pharmacological improvement of  
 sensory gating affects the first click response for this set  
 of animals [17, 13].

Lastly we quantified the inter-peak interval (latency  
 between the N40 and P80 peaks) of the response to the  
 paired clicks (Supplemental Figure S5). When double  
 peaks were present, we measured latency from the first  
 peak in the doublet (Supplemental Figure S5A). We did  
 not see any difference in the number of double N40 peaks  
 recorded from sham and noise-exposed animals ( $p > 0.07$   
 for all conditions tested; Supplemental Figure S5B). Also,  
 there were no significant differences in the inter-peak  
 interval between negative and positive aERP for either  
 treatments or groups ( $F(1,20) < 2.06$ ,  $p > 0.1$ ; Supple-  
 mental Figure S5C). Thereby the average aERP waveform  
 appears robust for latencies, despite individual variability.

Taken together, this study found noise-exposed mice  
 to normally gate repetitive auditory stimuli, but showing  
 larger amplitudes and slower processing of attention to  
 repetitive clicks after pharmacological perturbations of  
 the cholinergic and endocannabinoid systems, compared  
 to sham-treated animals. The modulation of aERPs under  
 cannabis + nicotine treatment was specifically related to  
 the first click of the N40 component amplitude in noise-  
 exposed mice.

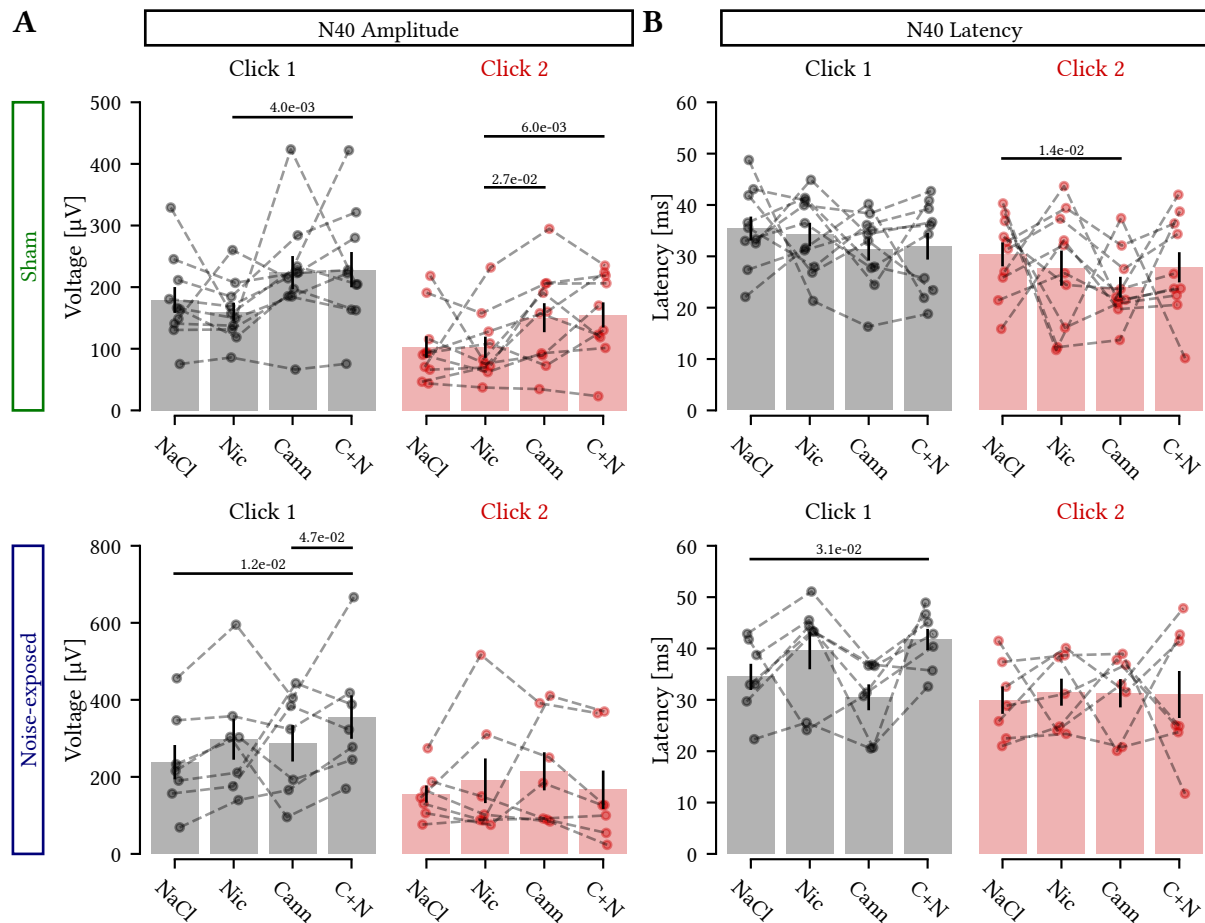

**Figure 6:** Noise-exposed mice only show modulation of the first click N40 response following cannabis+nicotine treatment. A) Comparison of the N40 amplitude in response to the first click (left) and second click (right) after saline, nicotine, cannabis extract and cannabis+nicotine administration for sham (top) and noise-exposed (bottom) mice. B) Latency comparisons between the first (left) and second (right) click responses in sham (top) and noise-exposed (bottom) animals across treatments. Only sham animals showed alterations of the second click amplitude and latency upon nicotine and cannabis treatment. Student's t-test (A) and Wilcoxon signed-rank test (B),  $n = 10$  sham and 7 noise-exposed mice.

## 752 Discussion

753 We found that the N40 amplitude and latency is increased  
 754 in animals with mild noise-exposure (Figure 7A-B). These  
 755 mice showed increased ratio of the amplitude of first and  
 756 second click N40 components upon cannabis and nicotine  
 757 administration compared to sham animals (Figure 7C),  
 758 which indicates improvement in sensory gating. Cannabis  
 759 administration also increased the latency ratio of the N40  
 760 component of aERPs for noise-exposed mice compared  
 761 to sham mice (Figure 7D), indicating altered temporal  
 762 processing. Our findings imply that cholinergic and endo-  
 763 cannabinoid signaling and/or downstream pathways are  
 764 involved in perturbed sound processing after mild noise  
 765 exposure. Still, the cannabis extract may contain sub-  
 766 stances that act on non-endocannabinoid targets [47], and  
 767 further studies utilizing isolated endocannabinoid receptor  
 768 agonists could elucidate the involvement of these receptors

in sound processing.

Tinnitus is a highly heterogeneous disorder in humans  
 [48], and the underlying pathophysiological mechanisms  
 remain unclear. Recent evidence in animals and humans  
 cumulate towards the involvement of the limbic system  
 in tinnitus [7], however the confounding effects of hear-  
 ing loss and hyperacusis make the disentangling of each  
 contributing factor quite challenging [49]. Our data is con-  
 sistent with findings described by Campbell et al. (2018),  
 studying young individuals with mild tinnitus and a nor-  
 mal audiogram. They found poorer auditory processing,  
 indicating impaired sensory gating, due to no significant  
 difference between response amplitudes of the first and  
 second P50 aERP for tinnitus patients [19], similar to  
 what we found for N40 under saline treatment (Supple-  
 mental Figure S2). Thereby our animal model results  
 match patients with mild tinnitus. To our knowledge, this  
 is the first study to investigate sensory gating in the hip-

787 pocusampus in noise-exposed mice and to evaluate how the  
788 cholinergic and endocannabinoid system interferes with  
789 sensory gating in these animals. A strength of this study  
790 is that hippocampal location for quantifying aERPs was  
791 standardized by anatomical post hoc examination and by  
792 electrophysiological profile [32] at each treatment session,  
793 thereby opening up for systematically testing a variety  
794 of compounds affecting limbic processing of attention to  
795 sound.

796 Another limitation is that the direct impact of nicotine  
797 and the cannabis extract on tinnitus were not assessed  
798 after the pharmacological intervention. This limitation  
799 was due to the size of the implanted electrode, thereby  
800 not allowing animals to enter the restraining tube, de-  
801 signed to make mice stand on all four paws during GPIAS  
802 measurements. Previous studies of cannabis as a tinnitus  
803 treatment have shown conflicting results [50, 51]. For  
804 instance, acute injection of the synthetic CB1/CB2 re-  
805 ceptor agonists (WIN55,212-2, or CP55,940), exacerbate  
806 salicylate-induced tinnitus in rats assessed using a con-  
807 ditioned lick suppression paradigm [52], whereas acute  
808 treatment with the CB1 receptor agonist arachidonyl-2-  
809 chloroethylamide (ACEA) had no effect (as measured by  
810 GPIAS) in guinea pigs with salicylate-induced tinnitus  
811 [53]. It is possible that the confounding effects of stress on  
812 GPIAS measures caused by either salicylate or cannabis  
813 complexify the behavioral interpretation.

814 Based on the hypothesis that tinnitus can be similar  
815 to epilepsy due to hyperactivity in auditory and non-  
816 auditory pathways [54], here we used an extract contain-  
817 ing a high dose of THC, since it was previously demon-  
818 strated that high THC doses presented anticonvulsant  
819 effects. 50mg/kg THC was shown to prevent sponta-  
820 neous seizures in rodents [55, 56]; and THC doses up to  
821 100 mg/kg, with effective dose at 48 mg/kg, to be an-  
822 ticonvulsant after seizure generation by electroshock in  
823 mice [57]. Even 80 mg/kg THC effectively suppressed  
824 pharmacologically-induced convulsions, delayed their on-  
825 set, and prevented mortality in mice [58]. In addition,  
826 96% of patients of a Canadian study reported that they  
827 would consider cannabis as treatment for their tinnitus  
828 [59]. Furthermore, cannabis extract concentration has  
829 shown U-shaped dose-response antidepressant effects in  
830 mice [40], thereby evaluating dose-dependent effects of  
831 activating CB1 receptors in different tinnitus models, as  
832 well as comparisons of administration routes of cannabis  
833 extract, is necessary in future studies.

834 Here we found that pharmacological manipulations of  
835 aERPs with both nicotine and cannabis extract improve  
836 sensory gating in noise-exposed mice but not in sham-

837 treated animals. Our findings suggest that the higher  
838 N40 ratio under cannabis extract together with nicotine  
839 treatment in noise-exposed mice is related to an elevated  
840 click 1 amplitude and a lack of consistent modulation of  
841 the response to the second click, suggesting an increased  
842 registration (sensorial input processing) of the stimulus,  
843 as suggested previously [60]. Probably this effect was not  
844 seen in sham animals because both clicks were modulated  
845 by the treatments containing cannabis.

846 Nicotine is known to increase the amplitude of the  
847 P20 and N40 1st click in mice [13, 61]. The second click  
848 response has instead been shown to be sensitive to mus-  
849 carinic receptor antagonists, increasing the second click  
850 amplitude and disrupting sensory gating [62]. Next, the  
851 P80 response is known to be reduced by NMDA receptor  
852 antagonists such as ketamine [46, 63]. Thereby, an active  
853 cholinergic system appears to facilitate auditory gating  
854 of the N40 response, but it is important to notice that  
855 smoking is associated with greater risk of tinnitus [3]. We  
856 speculate that for tinnitus models nicotine might suppress  
857 hyperactivity in the dorsal cochlear nucleus since it has  
858 been previously demonstrated that cholinergic agonists  
859 such as carbachol can suppress noise-induced hyperactiv-  
860 ity in the DCN in rodents [64], possibly affecting sound  
861 processing in higher areas.

862 The combination of cannabis extract and nicotine  
863 could potentially cause interaction effects, since it has  
864 been shown in isolated cells that anandamide (an en-  
865 dogenous CB1 receptor agonist) decreased nicotinic cur-  
866 rents generated by nicotinic  $\alpha 7$  and  $\alpha 4\beta 2$  subunit con-  
867 taining acetylcholine receptors [65]. Also, a link between  
868 cannabis dependency and activity of subtypes of nicotinic  
869 acetylcholine receptors has recently been shown [66, 67].  
870 Furthermore, the interplay between the cholinergic and  
871 endocannabinoid system has been shown in basal fore-  
872 brain cholinergic neurons expressing CB1 receptors [68]  
873 and interestingly, human subjects administered orally a  
874 combination of a THC analog and nicotine have shown  
875 improved auditory deviant detection and mismatch neg-  
876 ativity aERPs, but not when each drug was delivered  
877 alone [22]. Since we found only noise-exposed animals  
878 to improve N40 amplitude gating ratio in response to  
879 cannabis+nictotine treatment, and since it has been demon-  
880 strated that vesicular acetylcholine transporters puncta  
881 density is decreased on both sides of the hippocampus  
882 after noise exposure [69], we hypothesize that nicotine  
883 administration could be compensating for a decrease in  
884 acetylcholine release in these animals. Still, the cellular  
885 mechanisms underlying such alterations in sensory gating  
886 remain to be further investigated.

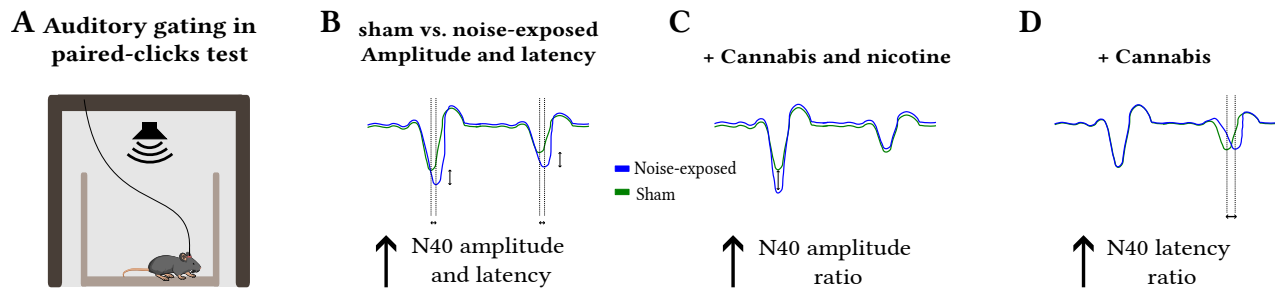

**Figure 7:** Schematics of the main findings. A) Experimental setup showing an implanted animal during the paired-click test recording. B) N40 amplitude and latency is increased in noise-exposed animals compared to sham. C) Cannabis + nicotine treatment improved N40 ratio by increasing the first click response. D) Cannabis treatment increased the second click latency ratio for noise-exposed animals compared to sham.

887 In general, the endocannabinoid system dampens neuronal activity by activation of Gi-protein coupled presynaptic CB1 receptors that decrease neurotransmitter release through blocking of presynaptic voltage-gated calcium channels and opening of voltage-gated potassium (GIRK) channels, allowing potassium to flow out of the terminal [70]. For example, high doses of natural cannabis extracts can reduce neuronal hyperactivity in in vitro models of spasticity and epilepsy [71] which is interesting since noise-induced tinnitus is related to neuronal hyperactivity of the auditory system [9]. Still, the circuit effect of CB1 receptor activation depends on what type of presynaptic neuron expresses CB1 receptors (etc. glutamatergic or GABAergic cells) which can affect local plasticity differently [72]. It is known that pyramidal cells of the hippocampus have relatively low expression of CB1 receptors [73] therefore we expect the cannabis extract to increase auditory input due to decreased inhibition, since CB1 receptors are strongly coexpressed with GAD65 in the hippocampus [73, 74], especially with strong CB1 receptor expression on cholecystokinin positive interneurons [74]. Furthermore, this study uses a THC-rich extract, which needs to be put in contrast to anxiolytic evaluation of THC at much lower doses [39] and studies of seizure reduction by THC at doses as high as 100 mg/kg [55]. Still the concentration of THC in a cannabis extract cannot be compared to THC alone, but should be considered in relation to other cannabinoids present. For example, a systematic review of cannabinoid treatment of chronic pain found products with high-THC-to-CBD ratios the most useful for short-term relief of neuropathic chronic pain [75].

919 The ability to suppress repetitive auditory stimuli was preserved in noise-exposed mice, suggesting that noise-induced tinnitus without changes in hearing thresholds does not interfere with auditory gating but that noise-induced tinnitus renders the response to auditory clicks

abnormal in the presence of cannabis by delaying temporal coding. Here we found that cannabis alone did not decrease aERP amplitude as has seen in human P300, probably due to the N40 component (human N100) reflecting triggered attention [76] and the human P300 reflecting cognitive stimulus classification [21]. It is important to pin-point cellular contribution to the aERP components and here, due to the availability of a transgenic line targeting Cre expression at cells expressing the alpha-2 nicotinic receptor [ChRNA2; 77], the role of the cholinergic system in sensory gating and tinnitus could be investigated by using chemogenetics to locally manipulate the excitability of these cells during aERP recordings; or in tinnitus induction performing similar manipulations during noise exposure. A similar approach would be difficult for investigating the role of the endocannabinoid system in tinnitus due to the unavailability of specific targeting of, for example, CB1-expressing cells. However, the depletion of glutamate aspartate transporter (GLAST) to exacerbate the tinnitus phenotype, may also be more appropriate to investigate in greater details the underlying cellular and molecular mechanisms [78]. Still, it is becoming clear that loud noise activates both auditory and limbic pathways [79] but how prolonged noise-exposure alters sound processing of each system needs to be further examined, as well as how the limbic and auditory systems interact in tinnitus [11].

951 In conclusion, our study shows that provoking auditory event-related potentials pharmacologically, using nicotine and/or cannabis extract rich in THC, showed noise-exposed mice to improve gating of the N40 component especially under the combined influence of cannabis extract and nicotine, by increasing the first click response amplitude. However, cannabis extract also increased the latency ratio of the N40 component in noise-exposed mice compared to sham animals, indicating delayed temporal processing of paired clicks. Thereby the activation of

961 the cholinergic and endocannabinoid receptors and down-  
962 stream pathways have distinct and different effects on  
963 auditory gating in the context of tinnitus phenotype. Our  
964 findings provide insights into the neural processing alter-

ations associated with tinnitus-like behavior, which may  
facilitate the future development of diagnostic methods  
and potential pharmacological interventions.

965  
966  
967

## Conflict of Interest Statement

The authors declare that the research was conducted in the absence of any commercial or financial relationships that could be construed as a potential conflict of interest.

## Author Contributions

KEL and BC designed the study. BC and TM performed experiments; SRBS analyzed the cannabis extract; BC, TM and TZL analyzed the data; BC, CRC and KEL wrote the manuscript with important input from TM and TZL.

## Funding

This work is supported by the American Tinnitus Association and the Brazilian funding agency CAPES - Coordenação de Aperfeiçoamento de Pessoal de Nível Superior. CRC is supported by the GENDER-Net Co-Plus Fund (GNP-182), the European Union's Horizon 2020 Research and Innovation Programme, Grant Agreement No 848261 and the European Union's Horizon 2020 research and innovation programme under the Marie Skłodowska-Curie grant agreement No 722046. TM is supported by the Wenner-Gren Stiftelserna (UPD2020-0006 and UPD2021-0114).

## Acknowledgments

The authors thank Dr Claudio Queiroz at the Brain Institute-UFRN for providing the cannabis extract and Dr Jessica Winne for technical assistance in electrode manufacturing.

## Data Availability Statement

The datasets generated and/or analyzed in the current study are available on request. Recordings were done using the Open-ephys GUI [80]. Stimulation and data analysis were performed using SciScripts [81], Scipy [82] and Numpy [83]. All plots were produced using Matplotlib [84], and schematics were done using Inkscape [85]. All scripts used for recordings and analysis are available online [86].

## References

- [1] Berthold Langguth, Michael Landgrebe, Tobias Kleinjung, G. Philipp Sand, and Gáran Hajak. Tinnitus and depression. *The World Journal of Biological Psychiatry*, 12(7): 489–500, may 2011. doi: 10.3109/15622975.2011.575178. URL <https://doi.org/10.3109/15622975.2011.575178>.
- [2] Wolfgang Hiller and Gerhard Goebel. Factors influencing tinnitus loudness and annoyance. *Archives of Otolaryngology-Head & Neck Surgery*, 132(12):1323, 12 2006. doi: 10.1001/archotol.132.12.1323. URL <http://dx.doi.org/10.1001/archotol.132.12.1323>.
- [3] Roshni Biswas, Alessandra Lugo, Michael A Akeroyd, Winfried Schlee, Silvano Gallus, and DA Hall. Tinnitus prevalence in europe: a multi-country cross-sectional population study. *The Lancet Regional Health-Europe*, 12:100250, 2022.
- [4] R. F. F. Cima, B. Mazurek, H. Haider, D. Kikidis, A. Lapira, A. Noreña, and D. J. Hoare. A multidisciplinary european guideline for tinnitus: diagnostics, assessment, and treatment. *HNO*, 67(S1):10–42, mar 2019. doi: 10.1007/s00106-019-0633-7. URL <https://doi.org/10.1007/s00106-019-0633-7>.
- [5] Yihsin Tai and Fatima T Husain. The role of cognitive control in tinnitus and its relation to speech-in-noise performance. *Journal of audiology & otology*, 23(1):1, 2019.
- [6] Fan-Gang Zeng, Matthew Richardson, and Katie Turner. Tinnitus does not interfere with auditory and speech perception. *The Journal of Neuroscience*, 40(31):6007–6017, jun 2020. doi: 10.1523/jneurosci.0396-20.2020. URL <https://doi.org/10.1523/jneurosci.0396-20.2020>.
- [7] Yu-Chen Chen, Xiaowei Li, Lijie Liu, Jian Wang, Chun-Qiang Lu, Ming Yang, Yun Jiao, Feng-Chao Zang, Kelly Radziwon, Guang-Di Chen, et al. Tinnitus and hyperacusis involve hyperactivity and enhanced connectivity in auditory-limbic-arousal-cerebellar network. *elife*, 4:e06576, 2015. doi: 10.7554/elife.06576.001. URL <https://doi.org/10.7554/elife.06576.001>.
- [8] C.P. Lanting, E. de Kleine, and P. van Dijk. Neural activity underlying tinnitus generation: Results from pet and fmri. *Hearing Research*, 255(1-2):1–13, sep 2009. doi:



- 10.1016/j.heares.2009.06.009. URL <https://doi.org/10.1016/j.heares.2009.06.009>.
- [9] Susan E. Shore, Larry E. Roberts, and Berthold Langguth. Maladaptive plasticity in tinnitus — triggers, mechanisms and treatment. *Nature Reviews Neurology*, 12(3):150–160, feb 2016. doi: 10.1038/nrneurol.2016.12. URL <https://doi.org/10.1038/nrneurol.2016.12>.
- [10] Meenakshi M. Asokan, Ross S. Williamson, Kenneth E. Hancock, and Daniel B. Polley. Sensory overamplification in layer 5 auditory corticofugal projection neurons following cochlear nerve synaptic damage. *Nature Communications*, 9(1), jun 2018. doi: 10.1038/s41467-018-04852-y. URL <https://doi.org/10.1038/s41467-018-04852-y>.
- [11] Tengfei Qu, Yue Qi, Shukui Yu, Zhengde Du, Wei Wei, Aoling Cai, Jie Wang, Binbin Nie, Ke Liu, and Shusheng Gong. Dynamic changes of functional neuronal activities between the auditory pathway and limbic systems contribute to noise-induced tinnitus with a normal audiogram. *Neuroscience*, 408:31–45, jun 2019. doi: 10.1016/j.neuroscience.2019.03.054. URL <https://doi.org/10.1016/j.neuroscience.2019.03.054>.
- [12] Yosra Nadhimi and Daniel A. Llano. Does hearing loss lead to dementia? a review of the literature. *Hearing Research*, 402:108038, mar 2021. doi: 10.1016/j.heares.2020.108038. URL <https://doi.org/10.1016/j.heares.2020.108038>.
- [13] Noam D. Rudnick, Andrew A. Strasser, Jennifer M. Phillips, Christopher Jepson, Freda Patterson, Joseph M. Frey, Bruce I. Turetsky, Caryn Lerman, and Steven J. Siegel. Mouse model predicts effects of smoking and varenicline on event-related potentials in humans. *Nicotine & Tobacco Research*, 12(6):589–597, apr 2010. doi: 10.1093/ntr/ntq049. URL <https://doi.org/10.1093/ntr/ntq049>.
- [14] J Smucny, K E Stevens, A Olincy, and J R Tregellas. Translational utility of rodent hippocampal auditory gating in schizophrenia research: a review and evaluation. *Translational Psychiatry*, 5(6):e587–e587, jun 2015. doi: 10.1038/tp.2015.77. URL <https://doi.org/10.1038/tp.2015.77>.
- [15] Jingyi Ma, Siew Kian Tai, and L. Stan Leung. Ketamine-induced deficit of auditory gating in the hippocampus of rats is alleviated by medial septal inactivation and antipsychotic drugs. *Psychopharmacology*, 206(3):457–467, aug 2009. doi: 10.1007/s00213-009-1623-3. URL <https://doi.org/10.1007/s00213-009-1623-3>.
- [16] Lee A. Cenquizca and Larry W. Swanson. Spatial organization of direct hippocampal field cal axonal projections to the rest of the cerebral cortex. *Brain Research Reviews*, 56(1):1–26, nov 2007. doi: 10.1016/j.brainresrev.2007.05.002. URL <https://doi.org/10.1016/j.brainresrev.2007.05.002>.
- [17] Laura C. Amann, Jennifer M. Phillips, Tobias B. Halene, and Steven J. Siegel. Male and female mice differ for baseline and nicotine-induced event related potentials. *Behavioral Neuroscience*, 122(5):982–990, 2008. doi: 10.1037/a0012995. URL <https://doi.org/10.1037/a0012995>.
- [18] Marijn Lijffijt, Scott D. Lane, Stacey L. Meier, Nash N. Boutros, Scott Burroughs, Joel L. Steinberg, F. Gerard Moeller, and Alan C. Swann. P50, n100, and p200 sensory gating: Relationships with behavioral inhibition, attention, and working memory. *Psychophysiology*, 46(5):1059–1068, sep 2009. doi: 10.1111/j.1469-8986.2009.00845.x. URL <https://doi.org/10.1111/j.1469-8986.2009.00845.x>.
- [19] Julia Campbell, Connor Bean, and Alison LaBrec. Normal hearing young adults with mild tinnitus: Reduced inhibition as measured through sensory gating. *Audiology Research*, 8(2):214, oct 2018. doi: 10.4081/audiore.2018.214. URL <https://doi.org/10.4081/audiore.2018.214>.
- [20] Valdete Alves Valentins dos Santos Filha and Carla Gentile Matas. Late auditory evoked potentials in individuals with tinnitus. *Brazilian journal of otorhinolaryngology*, 76(2):263–270, 2010.
- [21] K.B.E. Bäcker, J. Gerritsen, C.C. Hunault, M. Kruidenier, Tj.T. Mensinga, and J.L. Kenemans. Cannabis with high  $\delta$ 9-thc contents affects perception and visual selective attention acutely: An event-related potential study. *Pharmacology Biochemistry and Behavior*, 96(1):67–74, jul 2010. doi: 10.1016/j.pbb.2010.04.008. URL <https://doi.org/10.1016/j.pbb.2010.04.008>.
- [22] Sara de la Salle, Lawrence Inyang, Danielle Impey, Dylan Smith, Joelle Choueiry, Renee Nelson, Jasmit Heera, Ashley Baddeley, Vadim Ilivitsky, and Verner Knott. Acute separate and combined effects of cannabinoid and nicotinic receptor agonists on MMN-indexed auditory deviance detection in healthy humans. *Pharmacology Biochemistry and Behavior*, 184:172739, sep 2019. doi: 10.1016/j.pbb.2019.172739. URL <https://doi.org/10.1016/j.pbb.2019.172739>.
- [23] Thawann Malfatti, Barbara Ciralli, Markus M. Hilscher, Richardson N. Leao, and Katarina E. Leao. Decreasing dorsal cochlear nucleus activity ameliorates noise-induced tinnitus perception in mice. *BMC Biology*, 20(1), may 2022. doi: 10.1186/s12915-022-01288-1. URL <https://doi.org/10.1186/s12915-022-01288-1>.
- [24] Jeremy G. Turner, Thomas J. Brozoski, Carol A. Bauer, Jennifer L. Parrish, Kristin Myers, Larry F. Hughes, and Donald M. Casparly. Gap detection deficits in rats with tinnitus: A potential novel screening tool. *Behavioral Neuroscience*, 120(1):188–195, 2006. doi: 10.1037/0735-7044.120.1.188. URL <https://doi.org/10.1037/0735-7044.120.1.188>.
- [25] R.J. Longenecker and A.V. Galazyuk. Methodological optimization of tinnitus assessment using prepulse inhibition of the acoustic startle reflex. *Brain Research*, 1485:54–62, nov 2012. doi: 10.1016/j.brainres.2012.02.067. URL <https://doi.org/10.1016/j.brainres.2012.02.067>.
- [26] Ryan J. Longenecker and Alexander V. Galazyuk. Variable effects of acoustic trauma on behavioral and neural correlates of tinnitus in individual animals. *Frontiers in Behavioral Neuroscience*, 10, oct 2016. doi: 10.3389/fnbeh.2016.00207. URL <https://doi.org/10.3389/fnbeh.2016.00207>.
- [27] Ryan J. Longenecker, Inga Kristaponyte, Gregg L. Nelson, Jesse W. Young, and Alexander V. Galazyuk. Addressing variability in the acoustic startle reflex for accurate gap detection assessment. *Hearing Research*, 363:119–135, jun 2018. doi: 10.1016/j.heares.2018.03.013. URL <https://doi.org/10.1016/j.heares.2018.03.013>.
- [28] So Young Park, Min Jung Kim, Jung Mee Park, and Shi Nae Park. A mouse model of tinnitus using gap prepulse inhibition of the acoustic startle in an accelerated hearing loss strain. *Otology & Neurotology*, 41(4):e516–e525, apr 2020. doi: 10.1097/mao.0000000000002573. URL <https://doi.org/10.1097/mao.0000000000002573>.
- [29] S. Li, V. Choi, and T. Tzounopoulos. Pathogenic plasticity of kv7.2/3 channel activity is essential for the induction of

- tinnitus. *Proceedings of the National Academy of Sciences*, 110(24):9980–9985, may 2013. doi: 10.1073/pnas.1302770110. URL <https://doi.org/10.1073/pnas.1302770110>.
- [30] Jeremy Turner, Deb Larsen, Larry Hughes, Diederik Moechars, and Susan Shore. Time course of tinnitus development following noise exposure in mice. *Journal of Neuroscience Research*, 90(7):1480–1488, mar 2012. doi: 10.1002/jnr.22827. URL <https://doi.org/10.1002/jnr.22827>.
- [31] Joshua J. Sturm, Ying-Xin Zhang-Hooks, Hannah Roos, Tuan Nguyen, and Karl Kandler. Noise trauma-induced behavioral gap detection deficits correlate with reorganization of excitatory and inhibitory local circuits in the inferior colliculus and are prevented by acoustic enrichment. *The Journal of Neuroscience*, 37(26):6314–6330, jun 2017. doi: 10.1523/jneurosci.0602-17.2017. URL <https://doi.org/10.1523/jneurosci.0602-17.2017>.
- [32] Robson Scheffer-Teixeira, Hindiael Belchior, Fabio V Caixeta, Bryan C Souza, Sidarta Ribeiro, and Adriano BL Tort. Theta phase modulates multiple layer-specific oscillations in the cal region. *Cerebral cortex*, 22(10):2404–2414, 2011.
- [33] Peter B. Sampson. Phytocannabinoid pharmacology: Medicinal properties of cannabis sativa constituents aside from the “big two”. *Journal of Natural Products*, 84(1):142–160, dec 2020. doi: 10.1021/acs.jnatprod.0c00965. URL <https://doi.org/10.1021/acs.jnatprod.0c00965>.
- [34] Kayla L. Metzger, Christina R. Maxwell, Yuling Liang, and Steven J. Siegel. Effects of nicotine vary across two auditory evoked potentials in the mouse. *Biological Psychiatry*, 61(1):23–30, jan 2007. doi: 10.1016/j.biopsych.2005.12.011. URL <https://doi.org/10.1016/j.biopsych.2005.12.011>.
- [35] DR Petersen, KJ Norris, and JA Thompson. A comparative study of the disposition of nicotine and its metabolites in three inbred strains of mice. *Drug Metabolism and Disposition*, 12(6):725–731, 1984.
- [36] Alexa Torrens, Valentina Vozella, Hannah Huff, Brandon McNeil, Faizy Ahmed, Andrea Ghidini, Stephen V. Mahler, Marilyn A. Huestis, Aditi Das, and Daniele Piomelli. Comparative pharmacokinetics of  $\delta$ 9-tetrahydrocannabinol in adolescent and adult male mice. *Journal of Pharmacology and Experimental Therapeutics*, 374(1):151–160, apr 2020. doi: 10.1124/jpet.120.265892. URL <https://doi.org/10.1124/jpet.120.265892>.
- [37] Chen Xu, Tanran Chang, Yaqi Du, Chaohui Yu, Xin Tan, and Xiangdong Li. Pharmacokinetics of oral and intravenous cannabidiol and its antidepressant-like effects in chronic mild stress mouse model. *Environmental Toxicology and Pharmacology*, 70:103202, aug 2019. doi: 10.1016/j.etap.2019.103202. URL <https://doi.org/10.1016/j.etap.2019.103202>.
- [38] Eva Johansson, Agneta Ohlsson, Jan-Erik Lindgren, Stig Agurell, Hampton Gillespie, and Leo E. Hollister. Single-dose kinetics of deuterium-labelled cannabidiol in man after intravenous administration and smoking. *Biological Mass Spectrometry*, 14(9):495–499, 9 1987. doi: 10.1002/bms.1200140904. URL <http://dx.doi.org/10.1002/bms.1200140904>.
- [39] Chelsea R. Kasten, Yanping Zhang, and Stephen L. Boehm. Acute cannabinoids produce robust anxiety-like and locomotor effects in mice, but long-term consequences are age- and sex-dependent. *Frontiers in Behavioral Neuroscience*, 13, feb 2019. doi: 10.3389/fnbeh.2019.00032. URL <https://doi.org/10.3389/fnbeh.2019.00032>.
- [40] Abir T. El-Alfy, Kelly Ivey, Keisha Robinson, Safwat Ahmed, Mohamed Radwan, Desmond Slade, Ikhlas Khan, Mahmoud ElSohly, and Samir Ross. Antidepressant-like effect of  $\delta$ 9-tetrahydrocannabinol and other cannabinoids isolated from cannabis sativa l. *Pharmacology Biochemistry and Behavior*, 95(4):434–442, jun 2010. doi: 10.1016/j.pbb.2010.03.004. URL <https://doi.org/10.1016/j.pbb.2010.03.004>.
- [41] Dilshani W.N. Dissanayake, Margarita Zachariou, Charles A. Marsden, and Robert Mason. Auditory gating in rat hippocampus and medial prefrontal cortex: Effect of the cannabinoid agonist win55,212-2. *Neuropharmacology*, 55(8):1397–1404, dec 2008. doi: 10.1016/j.neuropharm.2008.08.039. URL <https://doi.org/10.1016/j.neuropharm.2008.08.039>.
- [42] Kenneth R Henry. Auditory brainstem volume-conducted responses: origins in the laboratory mouse. *Journal of the American Auditory Society*, 4(5):173–178, 1979.
- [43] W. Zhang, Z. Peng, S. Yu, Q.-L. Song, T.-F. Qu, K. Liu, and S.-S. Gong. Exposure to sodium salicylate disrupts VGLUT3 expression in cochlear inner hair cells and contributes to tinnitus. *Physiological Research*, pages 181–190, feb 2020. doi: 10.33549/physiolres.934180. URL <https://doi.org/10.33549/physiolres.934180>.
- [44] Elizabeth C. Ballinger, Mala Ananth, David A. Talmage, and Lorna W. Role. Basal forebrain cholinergic circuits and signaling in cognition and cognitive decline. *Neuron*, 91(6):1199–1218, sep 2016. doi: 10.1016/j.neuron.2016.09.006. URL <https://doi.org/10.1016/j.neuron.2016.09.006>.
- [45] Christopher D Verrico, J David Jentsch, Robert H Roth, and Jane R Taylor. Repeated, intermittent  $\delta$ 9-tetrahydrocannabinol administration to rats impairs acquisition and performance of a test of visuospatial divided attention. *Neuropsychopharmacology*, 29(3):522–529, aug 2003. doi: 10.1038/sj.npp.1300316. URL <https://doi.org/10.1038/sj.npp.1300316>.
- [46] Patrick M. Connolly, Christina Maxwell, Yuling Liang, Jonathan B. Kahn, Stephen J. Kanes, Ted Abel, Raquel E. Gur, Bruce I. Turetsky, and Steven J. Siegel. The effects of ketamine vary among inbred mouse strains and mimic schizophrenia for the p80, but not p20 or n40 auditory erp components. *Neurochemical Research*, 29(6):1179–1188, 6 2004. doi: 10.1023/b:nere.0000023605.68408.fb. URL <http://dx.doi.org/10.1023/b:nere.0000023605.68408.fb>.
- [47] Leontina Elena Filipciuc, Daniela Carmen Ababei, Teodora Alexa-Stratulat, Cosmin Vasilica Pricope, Veronica Bild, Raluca Stefanescu, Gabriela Dumitrita Stanciu, and Bogdan-Ionel Tamba. Major phytocannabinoids and their related compounds: Should we only search for drugs that act on cannabinoid receptors? *Pharmaceutics*, 13(11):1823, 11 2021. doi: 10.3390/pharmaceutics13111823. URL <http://dx.doi.org/10.3390/pharmaceutics13111823>.
- [48] Christopher R. Cederroth, MirNabi PirouziFard, Natalia Trpchevska, Esmat Idrizbegovic, Barbara Canlon, Jan Sundquist, Kristina Sundquist, and Bengt Zällér. Association of genetic vs environmental factors in swedish adoptees with clinically significant tinnitus. *JAMA Otolaryngology-Head & Neck Surgery*, 145(3):222, mar 2019. doi: 10.1001/jamaoto.2018.3852. URL <https://doi.org/10.1001/jamaoto.2018.3852>.
- [49] Rafay A. Khan, Bradley P. Sutton, Yihsin Tai, Sara A. Schmidt, Somayeh Shahsavarani, and Fatima T. Husain. A large-scale diffusion imaging study of tinnitus and hearing loss. *Scientific Reports*, 11(1), dec 2021. doi: 10.

- 1038/s41598-021-02908-6. URL <https://doi.org/10.1038/s41598-021-02908-6>.
- [50] Yiwen Zheng and Paul F. Smith. Cannabinoid drugs: will they relieve or exacerbate tinnitus? *Current Opinion in Neurology*, 32(1):131–136, feb 2019. doi: 10.1097/wco.0000000000000631. URL <https://doi.org/10.1097/wco.0000000000000631>.
- [51] Vishal Narwani, Alexandra Bourdillon, Keerthana Nalamada, R. Peter Manes, and Douglas M. Hildrew. Does cannabis alleviate tinnitus? a review of the current literature. *Laryngoscope Investigative Otolaryngology*, 5(6):1147–1155, oct 2020. doi: 10.1002/lio2.479. URL <https://doi.org/10.1002/lio2.479>.
- [52] Yiwen Zheng, Lucy Stiles, Emma Hamilton, Paul F. Smith, and Cynthia L. Darlington. The effects of the synthetic cannabinoid receptor agonists, win55,212-2 and cp55,940, on salicylate-induced tinnitus in rats. *Hearing Research*, 268(1-2):145–150, sep 2010. doi: 10.1016/j.heares.2010.05.015. URL <https://doi.org/10.1016/j.heares.2010.05.015>.
- [53] Joel I. Berger, Ben Coomber, Samantha Hill, Steve P.H. Alexander, William Owen, Alan R. Palmer, and Mark N. Wallace. Effects of the cannabinoid cb1 agonist acea on salicylate ototoxicity, hyperacusis and tinnitus in guinea pigs. *Hearing Research*, 356:51–62, dec 2017. doi: 10.1016/j.heares.2017.10.012. URL <https://doi.org/10.1016/j.heares.2017.10.012>.
- [54] Paul F. Smith and Yiwen Zheng. Cannabinoids, cannabinoid receptors and tinnitus. *Hearing Research*, 332:210–216, feb 2016. doi: 10.1016/j.heares.2015.09.014. URL <https://doi.org/10.1016/j.heares.2015.09.014>.
- [55] Evan C. Rosenberg, Pabitra H. Patra, and Benjamin J. Whalley. Therapeutic effects of cannabinoids in animal models of seizures, epilepsy, epileptogenesis, and epilepsy-related neuroprotection. *Epilepsy & Behavior*, 70:319–327, may 2017. doi: 10.1016/j.yebeh.2016.11.006. URL <https://doi.org/10.1016/j.yebeh.2016.11.006>.
- [56] Martijn Ten Ham, William J. Loskota, and Peter Lomax. Acute and chronic effects of  $\delta$ 9-tetrahydrocannabinol on seizures in the gerbil. *European Journal of Pharmacology*, 31(1):148–152, 3 1975. doi: 10.1016/0014-2999(75)90087-4. URL [http://dx.doi.org/10.1016/0014-2999\(75\)90087-4](http://dx.doi.org/10.1016/0014-2999(75)90087-4).
- [57] Melisa J Wallace, Jenny L Wiley, Billy R Martin, and Robert J DeLorenzo. Assessment of the role of cb1 receptors in cannabinoid anticonvulsant effects. *European Journal of Pharmacology*, 428(1):51–57, 9 2001. doi: 10.1016/s0014-2999(01)01243-2. URL [http://dx.doi.org/10.1016/s0014-2999\(01\)01243-2](http://dx.doi.org/10.1016/s0014-2999(01)01243-2).
- [58] R.Duane Sofia, Thomas A. Solomon, and Herbert Barry. Anticonvulsant activity of  $\delta$ 9-tetrahydrocannabinol compared with three other drugs. *European Journal of Pharmacology*, 35(1):7–16, 1 1976. doi: 10.1016/0014-2999(76)90295-8. URL [http://dx.doi.org/10.1016/0014-2999\(76\)90295-8](http://dx.doi.org/10.1016/0014-2999(76)90295-8).
- [59] Dorsa Mavedatnia, Marc Levin, Jong Wook Lee, Amr F. Hamour, Kaye Dizon, and Trung Le. Cannabis use amongst tinnitus patients: consumption patterns and attitudes. *Journal of Otolaryngology - Head & Neck Surgery*, 52(1), feb 2023. doi: 10.1186/s40463-022-00603-8. URL <https://doi.org/10.1186/s40463-022-00603-8>.
- [60] Anke Brockhaus-Dumke, Frauke Schultze-Lutter, Ralf Mueller, Indira Tendolkar, Andreas Bechdorf, Ralf Pukrop, Joachim Klosterkoetter, and Stephan Ruhrmann. Sensory gating in schizophrenia: P50 and n100 gating in antipsychotic-free subjects at risk, first-episode, and chronic patients. *Biological Psychiatry*, 64(5):376–384, sep 2008. doi: 10.1016/j.biopsych.2008.02.006. URL <https://doi.org/10.1016/j.biopsych.2008.02.006>.
- [61] Robert E. Featherstone, Jennifer M. Phillips, Tony Thieu, Richard S. Ehrlichman, Tobias B. Halene, Steven C. Leiser, Edward Christian, Edwin Johnson, Caryn Lerman, and Steven J. Siegel. Nicotine receptor subtype-specific effects on auditory evoked oscillations and potentials. *PLoS ONE*, 7(7):e39775, jul 2012. doi: 10.1371/journal.pone.0039775. URL <https://doi.org/10.1371/journal.pone.0039775>.
- [62] Inge Klinkenberg, Anke Sambeth, and Arjan Blokland. Acetylcholine and attention. *Behavioural brain research*, 221(2):430–442, 2011.
- [63] Robert E. Featherstone, Rick Shin, Jeffrey H. Kogan, Yuling Liang, Mitsuyuki Matsumoto, and Steven J. Siegel. Mice with subtle reduction of nmda nr1 receptor subunit expression have a selective decrease in mismatch negativity: Implications for schizophrenia prodromal population. *Neurobiology of Disease*, 73:289–295, jan 2015. doi: 10.1016/j.nbd.2014.10.010. URL <https://doi.org/10.1016/j.nbd.2014.10.010>.
- [64] N.F. Manzoor, Y. Gao, F. Licari, and J.A. Kaltenbach. Comparison and contrast of noise-induced hyperactivity in the dorsal cochlear nucleus and inferior colliculus. *Hearing Research*, 295:114–123, jan 2013. doi: 10.1016/j.heares.2012.04.003. URL <https://doi.org/10.1016/j.heares.2012.04.003>.
- [65] Charles E. Spivak, Carl R. Lupica, and Murat Oz. The endocannabinoid anandamide inhibits the function of  $\alpha$ 4 $\beta$ 2 nicotinic acetylcholine receptors. *Molecular Pharmacology*, 72(4):1024–1032, jul 2007. doi: 10.1124/mol.107.036939. URL <https://doi.org/10.1124/mol.107.036939>.
- [66] Giulia Donvito, Pretal P. Muldoon, Kia J. Jackson, Urslan Ahmad, Nur T. Zaveri, J. Michael McIntosh, Xiangning Chen, Aron H. Lichtman, and M. Imad Damaj. Neuronal nicotinic acetylcholine receptors mediate  $\delta$ 9-thc dependence: Mouse and human studies. *Addiction Biology*, 25(1), oct 2018. doi: 10.1111/adb.12691. URL <https://doi.org/10.1111/adb.12691>.
- [67] Ditte Demontis, Veera Manikandan Rajagopal, Thorgeir E. Thorgeirsson, Thomas D. Als, Jakob Grove, Kalle Leppälä, Daniel F. Gudbjartsson, Jonatan Pallesen, Carsten Hjorthøj, Gunnar W. Reginsson, Thorarinn Tyrifingsson, Valgerdur Runarsdottir, Per Qvist, Jane Hvarregaard Christensen, Jonas Bybjerg-Grauholm, Marie Bækvad-Hansen, Laura M. Huckins, Eli A. Stahl, Allan Timmermann, Esben Agerbo, David M. Hougaard, Thomas Werge, Ole Mors, Preben Bo Mortensen, Merete Nordentoft, Mark J. Daly, Hreinn Stefansson, Kari Stefansson, Mette Nyegaard, and Anders D. Børglum. Genome-wide association study implicates chrna2 in cannabis use disorder. *Nature Neuroscience*, 22(7):1066–1074, jun 2019. doi: 10.1038/s41593-019-0416-1. URL <https://doi.org/10.1038/s41593-019-0416-1>.
- [68] Tibor Harkany, Wolfgang Hartig, Paul Berghuis, Marton B. Dobszay, Yuri Zilberter, Robert H. Edwards, Ken Mackie, and Patrik Ernfors. Complementary distribution of type 1 cannabinoid receptors and vesicular glutamate transporter 3 in basal forebrain suggests input-specific retrograde signalling by cholinergic neurons. *European Journal of Neuroscience*, 18(7):1979–1992, oct 2003. doi: 10.1046/j.1460-9568.2003.02898.x. URL <https://doi.org/10.1046/j.1460-9568.2003.02898.x>.
- [69] Liqin Zhang, Calvin Wu, David T. Martel, Michael West, Michael A. Sutton, and Susan E. Shore. Remodeling of cholinergic input to the hippocampus after noise exposure and

- tinnitus induction in guinea pigs. *Hippocampus*, dec 2018. doi: 10.1002/hipo.23058. URL <https://doi.org/10.1002/hipo.23058>.
- [70] Debra A. Kendall and Guillermo A. Yudowski. Cannabinoid receptors in the central nervous system: Their signaling and roles in disease. *Frontiers in Cellular Neuroscience*, 10, jan 2017. doi: 10.3389/fncel.2016.00294. URL <https://doi.org/10.3389/fncel.2016.00294>.
- [71] J D Wilkinson, B J Whalley, D Baker, G Pryce, A Constanti, S Gibbons, and E M Williamson. Medicinal cannabis: is  $\delta$ 9-tetrahydrocannabinol necessary for all its effects? *Journal of Pharmacy and Pharmacology*, 55(12):1687–1694, dec 2003. doi: 10.1211/0022357022304. URL <https://doi.org/10.1211/0022357022304>.
- [72] Masanobu KANO. Control of synaptic function by endocannabinoid-mediated retrograde signaling. *Proceedings of the Japan Academy, Series B*, 90(7):235–250, 2014. doi: 10.2183/pjab.90.235. URL <https://doi.org/10.2183/pjab.90.235>.
- [73] Masanobu Kano, Takako Ohno-Shosaku, Yuki Hashimoto-dani, Motokazu Uchigashima, and Masahiko Watanabe. Endocannabinoid-mediated control of synaptic transmission. *Physiological Reviews*, 89(1):309–380, jan 2009. doi: 10.1152/physrev.00019.2008. URL <https://doi.org/10.1152/physrev.00019.2008>.
- [74] Hui Li, Jie Yang, Cuiping Tian, Min Diao, Quan Wang, Simeng Zhao, Shanshan Li, Fangzhi Tan, Tian Hua, Ya Qin, Chao-Po Lin, Dylan Deska-Gauthier, Garth J. Thompson, Ying Zhang, Wenqing Shui, Zhi-Jie Liu, Tong Wang, and Guisheng Zhong. Organized cannabinoid receptor distribution in neurons revealed by super-resolution fluorescence imaging. *Nature Communications*, 11(1), nov 2020. doi: 10.1038/s41467-020-19510-5. URL <https://doi.org/10.1038/s41467-020-19510-5>.
- [75] Marian S McDonagh, Benjamin J Morasco, Jesse Wagner, Azrah Y Ahmed, Rongwei Fu, Devan Kansagara, and Roger Chou. Cannabis-based products for chronic pain: A systematic review. *Annals of Internal Medicine*, 2022. doi: 10.7326/M21-4520. URL <https://doi.org/10.7326/M21-4520>.
- [76] Risto Naatanen and Risto Näätänen. *Attention and brain function*. Psychology Press, 1992.
- [77] Richardson N Leão, Sanja Mikulovic, Katarina E Leão, Hermany Munguba, Henrik Gezelius, Anders Enjin, Kalicharan Patra, Anders Eriksson, Leslie M Loew, Adriano B L Tort, and Klas Kullander. OLM interneurons differentially modulate CA3 and entorhinal inputs to hippocampal CA1 neurons. *Nature Neuroscience*, 15(11):1524–1530, oct 2012. doi: 10.1038/nn.3235. URL <https://doi.org/10.1038/nn.3235>.
- [78] Hong Yu, Kim Vikhe Patil, Chul Han, Brian Fabella, Barbara Canlon, Shinichi Someya, and Christopher R. Cederroth. GLAST deficiency in mice exacerbates gap detection deficits in a model of salicylate-induced tinnitus. *Frontiers in Behavioral Neuroscience*, 10, aug 2016. doi: 10.3389/fnbeh.2016.00158. URL <https://doi.org/10.3389/fnbeh.2016.00158>.
- [79] Guang-Wei Zhang, Wen-Jian Sun, Brian Zingg, Li Shen, Jufang He, Ying Xiong, Huizhong W. Tao, and Li I. Zhang. A non-canonical reticular-limbic central auditory pathway via medial septum contributes to fear conditioning. *Neuron*, 97(2):406–417.e4, jan 2018. doi: 10.1016/j.neuron.2017.12.010. URL <https://doi.org/10.1016/j.neuron.2017.12.010>.
- [80] Joshua H Siegle, Gregory J Hale, Jonathan P Newman, and Jakob Voigts. Neural ensemble communities: open-source approaches to hardware for large-scale electrophysiology. *Current Opinion in Neurobiology*, 32:53–59, jun 2015. doi: 10.1016/j.conb.2014.11.004. URL <https://doi.org/10.1016/j.conb.2014.11.004>.
- [81] T Malfatti. Sciscripts, 2023. URL <https://zenodo.org/record/4045872>. Software.
- [82] Pauli Virtanen, Ralf Gommers, Travis E. Oliphant, Matt Haberland, Tyler Reddy, David Cournapeau, Evgeni Burovski, Pearu Peterson, Warren Weckesser, Jonathan Bright, Stéfan J. van der Walt, Matthew Brett, Joshua Wilson, K. Jarrod Millman, Nikolay Mayorov, Andrew R. J. Nelson, Eric Jones, Robert Kern, Eric Larson, C J Carey, Ilhan Polat, Yu Feng, Eric W. Moore, Jake VanderPlas, Denis Laxalde, Josef Perktold, Robert Cimrman, Ian Henriksen, E. A. Quintero, Charles R. Harris, Anne M. Archibald, Antônio H. Ribeiro, Fabian Pedregosa, Paul van Mulbregt, and SciPy 1.0 Contributors. SciPy 1.0: Fundamental Algorithms for Scientific Computing in Python. *Nature Methods*, 17:261–272, 2020. doi: 10.1038/s41592-019-0686-2.
- [83] Charles R. Harris, K. Jarrod Millman, Stéfan J van der Walt, Ralf Gommers, Pauli Virtanen, David Cournapeau, Eric Wieser, Julian Taylor, Sebastian Berg, Nathaniel J. Smith, Robert Kern, Matti Picus, Stephan Hoyer, Marten H. van Kerkwijk, Matthew Brett, Allan Haldane, Jaime Fernández del Río, Mark Wiebe, Pearu Peterson, Pierre Gérard-Marchant, Kevin Sheppard, Tyler Reddy, Warren Weckesser, Hameer Abbasi, Christoph Gohlke, and Travis E. Oliphant. Array programming with NumPy. *Nature*, 585:357–362, 2020. doi: 10.1038/s41586-020-2649-2.
- [84] John D. Hunter. Matplotlib: A 2d Graphics Environment. *Computing in Science & Engineering*, 9(3):90–95, 2007. ISSN 1521-9615. doi: 10.1109/MCSE.2007.55. URL <http://ieeexplore.ieee.org/document/4160265/>.
- [85] Inkscape Project. Inkscape, 2022. URL <https://inkscape.org>. Software.
- [86] Barbara Ciralli, Thawann Malfatti, and Thiago Zaquie Lima. Sensorygatingontinnitus2022, 2022. URL <https://zenodo.org/record/6645914>. Software.
